# Supplementary material
Source: publisher figshare collection journal article supplement (https://frontiersin.figshare.com/ndownloader/files/21196110)
Supplement: Supplementary file 1 [file 21196110]

## Sheet: Caption
Data Sheet 1_v1.XLS. OTU Tables for each condition with all replicates and with replicates pooled for the microcosm experiment. The data sheet includes the taxonomy assignment for each OTU assessed by similarity (B for BLAST) and by phylogenetic tree (T for tree). p0z0.1.2 is the replicate 1 (ranging from 1 to 3) of the nanosized fraction (2; p0z0.1.10 is used for the microsized fraction) for the…

## Sheet: all_replicates
OTU	Btaxo_rank1	Btaxo_rank2	Btaxo_rank3	Btaxo_rank4	Btaxo_rank5	Bmorpho	Bacc_number	cov%	id%	Ttaxo_rank1	Ttaxo_rank2	Ttaxo_rank3	Ttaxo_rank4	Ttaxo_rank5	Tmorpho	node	Brench_L	occurrence	readnumber	To.1.2	To.1.10	To.3.2	To.3.10	p0z0.1.2	p0z0.1.10	p0z0.2.2	p0z0.2.10	p0z0.3.2	p0z0.3.10	p1z0.1.2	p1z0.1.10	p1z0.2.2	p1z0.2.10	p1z0.3.2	p1z0.3.10	p2z0.1.2	p2z0.1.10	p2z0.2.2	p2z0.2.10	p2z0.3.2	p2z0.3.10	p3z0.1.2	p3z0.1.10	p3z0.2.10	p3z0.3.2	p0z1.1.2	p0z1.1.10	p0z1.2.2	p0z1.2.10
OTU2	Euk	SAR	Str	Ba	Co	Th_Thalassiosira	KU352756	100	1	SAR	Str	Ba	Co	Th	Thalassiosira-mala	27	0.01418	72	767034	866	8303	9624	770	2112	17372	4309	16604	5546	24223	2055	16887	2297	24923	4185	17250	3325	2899	14210	17280	6571	18828	3390	15119	19878	4715	3620	21784	3739	14141
OTU1	Euk	SAR	Str	Di	Pe	Ap_Apedinella	HQ710559	100	1	SAR	Str	Di	Rh	Rh	Rhizochromulina-cf	16	0.00494	72	704394	3475	3427	4855	6085	16711	7150	15444	5857	15499	5034	14848	6489	20639	4816	18288	4356	12899	13440	7553	5316	11976	4391	9509	4395	3135	8606	15634	3305	19004	4980
OTU3	Euk	SAR	Str	Ba	Ba	Ba_Navicula	KT072983	100	1	SAR	Str	Ba	un		Bacillariophyta-sp	10	0.00075	72	182834	227	540	352	161	1811	2230	1512	2390	1680	2059	788	1192	475	1111	1206	1556	1174	1428	1536	1620	1605	1579	1321	1580	2870	2129	1865	2164	1682	2074
OTU6	Euk	SAR	Alv	Ci	In	Sp_Strombidium	KP260513	100	1	SAR	Alv	Ci	In	Sp	Strombidium-caudispina	9	0.01648	72	141305	4545	2018	2938	11865	3989	2969	2386	1459	986	501	5157	1110	3296	670	2420	1136	3217	2025	5117	776	900	922	4655	2932	698	3245	3461	1941	1410	1241
OTU5	Euk	SAR	Str	Ba	Co	Rh_Guinardia	KC309536	100	1	SAR	Str	Ba	Co	Rh	Guinardia-striata	4	0.00561	72	128745	104	4001	3808	45	134	2887	462	1888	369	2872	190	3493	274	1973	308	4769	234	42	5127	2292	682	3402	289	3210	2793	269	159	4604	139	3972
OTU7	Euk	SAR	Str	Ch	Ch	Ch_Chrysowaernella	HQ710556	100	0.96	SAR	Str	Ch	Ch	Ch	Chrysowaernella-hieroglyphica	4	0.09633	72	119915	95	194	450	593	1935	991	2630	1187	2078	733	1832	584	2983	734	2229	615	2405	4699	1923	810	2663	850	2616	836	724	3567	1928	420	2675	795
OTU8	Euk	SAR	Str	Ba	Me	Cy_Extubocellulus	AY485504	100	0.95	SAR	Str	Ba	Fr	Fr	Licmophora-remulus	15	0.10737	72	97162	2	1573	399	138	193	2469	367	2316	429	2362	228	3102	90	3123	277	2528	207	119	1613	1951	112	2115	201	2252	1813	218	177	2736	272	2527
OTU9	Euk	SAR	Alv	Ci	In	Sp_Strombidium	JF791016	100	1	SAR	Alv	Ci	In	Sp	Strombidium-hausmanni	2	0.05206	72	83707	5234	1982	1454	3735	1132	575	654	980	633	142	1369	507	772	212	501	278	1906	2480	1493	1138	591	793	4358	1205	1565	1808	1010	401	370	1503
OTU10	Euk	SAR	Str	Di	Di	Di_Dictyocha	U14385	100	0.93	SAR	Str	Ba	Fr	Fr	Licmophora-grandis	5	0.08314	72	71697	1341	97	421	716	1887	446	2250	456	1128	215	1792	413	1828	346	1419	89	1818	3306	837	392	1833	792	1528	547	192	1789	1631	200	1679	310
OTU20	Euk	SAR	Str	Oo	Ol	Ol_Olpidiopsis	KM210530	100	1	SAR	Str	PX	Xa	Mi	Botryidiopsidaceae-sp	7	0.00071	72	70102	716	371	414	860	1502	631	1588	327	2194	587	1358	528	1535	569	1702	731	1317	648	296	504	1784	390	976	442	283	920	1898	227	1934	624
OTU15	Euk	SAR	Alv	Co	Co	_Colponema	KJ598081	100	0.95	SAR	Rhi	Ce	Th		Mataza-hastifera	3	0.11574	72	62695	3045	463	848	1047	1538	249	1270	358	1122	462	957	282	1506	129	1339	122	1100	1857	487	171	961	108	1083	210	112	1329	1569	126	1603	291
OTU11	Euk	SAR	Alv	Ci	In	Sp_Helicostomella	AB640639	100	1	SAR	Alv	Ci	In	Sp	Parundella-sp	6	0.01622	71	57250	508	4552	1601	0	218	698	583	1805	18	202	688	1488	228	1613	142	825	492	878	953	1706	354	1554	315	3365	2143	223	287	1569	497	1646
OTU16	Euk	SAR	Alv	Ci	In	Sp_Strombidium	KP260510	100	1	SAR	Alv	Ci	In	Sp	Strombidium-capitatum	14	0.05425	69	52306	403	1940	105	1241	1833	549	1148	2596	202	134	3422	2918	69	79	482	1301	1223	6	2	2807	853	613	2722	1251	1763	2405	567	555	434	1076
OTU14	Euk	SAR	Alv	Di	Pe	He_Heterocapsa	KF925338	100	1	SAR	Alv	Di	Pe	He	Heterocapsa-arctica	5	0.00235	72	49659	1408	204	495	1340	824	372	606	315	859	193	589	233	636	360	923	496	920	704	294	368	854	281	805	353	215	1373	672	200	822	482
OTU17	Euk	SAR	Alv	Ci	In	Sp_Laboea	AF399154	100	1	SAR	Alv	Ci	In	Sp	Laboea-strobila	6	0.01051	72	46927	1808	735	262	136	1445	515	1149	390	424	243	893	796	651	235	665	688	1900	137	81	839	486	762	2285	1367	1663	897	993	248	557	606
OTU19	Euk	SAR	Alv	Ci	In	Pr_Pelagothrix	AB486009	100	0.98	SAR	Alv	Ci	In	Pr	Prorodon-viridis	14	0.04703	72	43562	598	365	358	1367	801	554	1091	902	1020	230	864	485	563	87	662	377	698	1694	678	395	1190	217	1804	985	687	1179	978	316	1006	349
OTU49	Euk	SAR	Str	Ch	Ch	Ch_Spumella	AJ236861	100	1	SAR	Str	Sy	Sy	Ma	Synura-americana	5	0.00078	72	43364	261	217	101	198	863	163	1009	273	1193	223	1005	375	838	145	780	142	949	1058	225	177	936	111	753	138	147	942	1130	123	1011	265
OTU13	Euk	SAR	Str	Bi	un	Ha_Halocafeteria	KT210055	100	0.92	SAR	Str	Bi	un	Ha	Halocafeteria-sp	2	0.19341	72	42743	65	308	458	1239	229	129	400	26	704	160	144	16	969	290	1117	236	936	625	149	124	1657	223	367	71	69	1383	461	120	743	226
OTU22	Euk	SAR	Str	Pe	Pe	Pe_Pelagomonas	KT861109	100	1	SAR	Str	Pe	Pe	Au	Aureococcus-anophagefferens	6	0.01337	72	37510	400	146	167	679	685	102	720	33	1659	25	612	122	817	74	1811	88	515	1201	194	142	1601	111	591	20	56	853	719	56	842	51
OTU23	Euk	SAR	Alv	Ci	In	Sp_Eutintinnus	JN831767	100	0.87	SAR	Str	Bi	un		Bicosoecida-sp	4	0.44173	72	33568	1217	1200	880	1560	361	184	525	707	274	218	732	500	478	172	344	539	1220	804	239	896	345	263	669	1225	997	818	470	356	143	731
OTU26	Euk	SAR	Alv	Ci	In	Sp_Strombidium	KJ737432	100	0.97	SAR	Alv	Ci	In	Sp	Strombidium-capitatum	18	0.0692	70	29319	2998	1395	2617	2867	353	101	248	302	128	210	316	102	278	15	104	838	352	489	248	157	96	523	563	85	271	218	427	468	124	423
OTU29	Euk	SAR	Str	Di	Pe	Ap_Apedinella	HQ710559	100	0.97	SAR	Str	Di	Rh	Rh	Rhizochromulina-cf	11	0.114	72	29197	12	19	2	255	844	169	662	81	1190	121	659	237	867	176	791	229	536	320	112	119	956	236	424	97	25	406	826	106	846	178
OTU27	Euk	SAR	Str	Di	Pe	un_Pedinellales	JF794054	100	1	SAR	Str	Di	Pe	un	Pedinellales-sp	6	0.00417	70	28856	71	0	53	420	941	476	630	315	971	280	590	257	768	202	1049	394	513	440	3	242	597	171	332	221	6	210	856	29	740	308
OTU51	Euk	SAR	Str	Ba	Ba	Ba_Stauroneis	KM998977	100	1	SAR	Str	Ba	Me	Bi	Psammoneis-obaidii	12	0.00645	72	27226	194	572	492	261	330	205	415	260	659	324	334	139	278	306	369	548	419	413	124	216	715	425	391	204	190	769	420	184	518	390
OTU30	Euk	SAR	Str	Ba	Co	Ch_Leptocylindrus	KC309538	100	1	SAR	Str	Ba	Co	Ch	Leptocylindrus-minimus	3	0.03148	72	26881	128	85	158	70	644	249	570	306	720	138	620	206	244	177	265	267	489	619	209	309	732	76	619	126	274	723	430	335	427	220
OTU32	Euk	SAR	Alv	Ci	In	Sp_Strombidium	FJ480419	100	1	SAR	Alv	Ci	In	Sp	Strombidium-basimorphum	5	0.00398	70	23192	7570	634	681	462	486	95	214	21	242	3	130	21	180	82	122	237	334	26	261	87	205	59	421	60	14	154	67	9	90	97
OTU34	Euk	SAR	Alv	Ci	In	Li_Askenasia	EU024989	100	0.98	SAR	Alv	Ci	In	Ol	Cyclidium-porcatum	4	0.05089	72	22653	787	165	79	487	481	222	845	9	230	324	940	200	647	56	325	32	1000	644	465	188	295	63	404	137	78	460	691	180	317	90
OTU38	Euk	SAR	Str	Di	Di	Di_Dictyocha	U14385	100	0.99	SAR	Str	Di	Di	Vi	Vicicitus-globosus	4	0.00081	72	20278	263	75	167	297	486	184	432	98	566	142	408	133	335	168	529	386	347	154	91	140	408	64	72	38	47	219	562	202	597	135
OTU35	Euk	SAR	Str	Ba	Co	Ch_Chaetoceros	AB430592	100	1	SAR	Str	Ba	Co	Ch	Chaetoceros-radicans	8	0.04207	65	19703	0	119	214	0	37	772	122	717	37	514	47	532	18	881	67	306	18	3	324	494	6	428	298	736	657	37	21	858	7	528
OTU40	Euk	SAR	Str	Ch	Ch	Pa_Paraphysomonas	JQ967305	100	0.94	SAR	Str	Sy	Sy	Sy	Chrysosphaerella-longispina	2	0.07661	71	19679	247	73	96	175	691	18	449	18	1048	47	637	7	489	35	625	12	493	128	1	19	628	17	368	7	12	314	758	9	589	48
OTU43	Euk	SAR	Str	Ba	Fr	Fr_Synedra	EF491890	100	1	SAR	Str	Ba	Fr	Fr	Grammonema-sp	6	0	71	18777	160	701	564	13	32	420	22	321	35	192	17	176	54	444	57	282	123	15	250	320	34	402	135	164	257	73	60	447	53	668
OTU37	Euk	SAR	Str	Ba	Co	Th_Cyclotella	AY485499	100	0.94	SAR	Str	Ba	Ba	Ba	Amphora-commutata	12	0.04452	72	17907	111	73	73	253	204	187	279	180	289	404	181	163	316	130	235	149	189	308	86	185	418	97	95	145	99	275	348	149	329	407
OTU36	Euk	SAR	Str	Ba	Co	Ch_Chaetoceros	AB847415	100	0.99	SAR	Str	Ba	Co	Ch	Chaetoceros-muellerii	6	0.0632	70	17823	0	178	161	4	34	437	43	389	24	305	45	402	18	507	18	497	19	4	422	425	15	589	35	543	535	39	23	518	37	352
OTU41	Euk	SAR	Alv	Ci	In	Pr_Plagiopogon	KC771342	100	0.96	SAR	Alv	Ci	In	Pr	Prorodon-viridis	14	0.04763	71	15771	1060	410	161	2333	242	37	337	82	187	17	542	191	228	69	248	209	533	40	51	198	249	90	228	90	85	419	158	10	138	178
OTU44	Euk	SAR	Alv	Ci	un	_Ciliate	AM412525	100	0.96	SAR	Alv	Ci	In	Pr	Prorodon-viridis	2	0.06347	69	15316	87	360	43	438	254	90	442	130	450	67	468	344	256	140	245	279	457	104	219	232	474	89	538	123	162	322	418	65	210	232
OTU58	Euk	SAR	Rhi	Ce	Im	Si_Protaspis	FJ824125	100	1	SAR	Rhi	Ce	Im	Si	Protaspis-sp	12	0.00488	72	15029	95	162	252	177	201	93	136	162	228	99	114	52	95	121	243	317	203	223	124	113	365	204	202	64	154	371	196	128	256	252
OTU42	Euk	SAR	Str	Ba	Me	Bi_Orizaformis	KR048192	100	1	SAR	Str	Ba	Me	Bi	Psammoneis-obaidii	5	0.00645	66	13248	1	1015	560	0	13	317	38	158	44	473	11	397	4	273	36	406	49	0	213	310	100	252	94	188	170	98	18	332	3	689
OTU46	Euk	SAR	Str	Ba	Co	Ch_Chaetoceros	KT860959	100	1	SAR	Str	Ba	Co	Ch	Chaetoceros-cf	2	0.02918	72	12683	50	701	380	33	82	166	44	263	42	203	70	126	67	130	63	529	77	177	106	260	101	260	44	288	349	99	67	318	214	307
OTU54	Euk	SAR	Alv	Di	Gy	Po_Polykrikos	EU418966	100	1	SAR	Alv	Di	Gy	Gy	Lepidodinium-chlorophorum	2	0.00077	71	12432	276	504	21	311	228	42	140	146	261	50	129	54	105	51	77	338	199	399	71	59	283	20	121	98	56	226	207	55	200	348
OTU48	Euk	SAR	Str	Ba	Co	Co_Corethron	KC309527	100	1	SAR	Str	Ba	Co	Co	Corethron-sp	8	0.00576	62	12304	0	102	277	0	6	372	16	291	10	351	9	364	13	304	31	247	10	14	170	222	0	531	37	270	351	26	7	390	0	127
OTU50	Euk	SAR	Str	Sy	Pa	Tr_Triparma	KR998401	100	0.99	SAR	Str	Ba	Ba	Ba	Diploneis-subovalis	5	0.03375	71	12223	5	129	330	47	26	368	26	303	117	462	24	142	25	241	89	362	10	14	78	219	15	428	90	126	218	54	35	218	41	146
OTU56	Euk	SAR	Alv	Ci	In	Sp_Stenosemella	AB640648	100	0.99	SAR	Alv	Ci	In	Sp	Stenosemella-nivalis	5	0.00642	53	11174	53	31	2244	1	1	66	0	449	0	535	3	946	1	158	0	0	0	229	0	104	0	471	141	8	96	7	7	98	0	24
OTU53	Euk	SAR	Str	Ba	Fr	Fr_Ulnaria	KF959659	100	1	SAR	Str	Ba	Fr	Fr	Grammonema-sp	5	0	69	11032	1	73	277	1	13	311	67	243	71	273	5	129	7	430	2	238	19	1	172	205	46	372	231	185	207	28	12	208	5	107
OTU52	Euk	SAR	Alv	Ci	In	Sp_Strombidinopsis	FJ790209	100	1	SAR	Alv	Ci	In	Sp	Strombidinopsis-acuminata	4	0.00236	42	10679	0	0	294	187	0	4	0	0	8	0	0	86	0	12	75	277	345	378	60	1134	113	636	0	0	0	4	0	26	0	4
OTU60	Euk	SAR	Str	Ch	Ch	Di_Dinobryon	EU024980	100	1	SAR	Str	Sy	Sy	Ma	Synura-americana	6	0.00078	69	9920	27	210	14	68	338	13	246	0	428	56	217	22	189	25	238	287	210	155	0	18	251	1	172	2	6	188	250	49	286	16
OTU61	Euk	SAR	Alv	Di	Gy	Gy_Gyrodinium	AB120004	100	0.96	SAR	Alv	Di	Gy	Gy	Gyrodinium-helveticum	2	0.0466	72	8815	41	165	249	75	64	100	76	266	190	145	56	191	84	55	66	154	114	49	244	131	193	53	136	192	155	258	89	109	146	354
OTU67	Euk	SAR	Alv	Di	Gy	Gy_Gyrodinium	AB120003	100	1	SAR	Alv	Di	Gy	Gy	Gyrodinium-rubrum	7	0	72	8335	220	666	482	431	38	43	54	142	92	119	63	230	44	121	79	32	125	33	94	150	279	8	64	119	96	237	91	135	90	308
OTU64	Euk	SAR	Alv	Ci	In	Sp_Spirostrombidium	KM222098	100	0.93	SAR	Alv	Ci	In	Sp	Pseudotontonia-simplicidens	4	0.14515	53	7155	192	1843	80	341	25	2	15	59	83	0	162	28	61	0	5	453	125	128	0	97	28	315	39	0	113	147	49	120	105	900
OTU70	Euk	SAR	Str	Ch	Ch	Ch_Ochromonas	FR865769	100	0.94	SAR	Str	Sy	Sy	Ma	Synura-uvella	2	0.13477	68	6647	3	5	1	2	149	9	160	1	269	9	141	2	132	17	206	0	136	82	0	13	164	1	128	18	4	224	133	0	129	2
OTU63	Euk	SAR	Str	Di	Fl	_Pseudochattonella	AM850218	100	1	SAR	Str	Di	Fl		Pseudochattonella-farcimen	4	0.0004	72	6557	86	44	102	147	62	122	39	64	67	172	53	82	67	107	13	78	79	173	52	109	72	45	72	90	22	98	76	70	116	137
OTU89	Euk	SAR	Alv	Ci	In	Sp_Spirostrombidium	JN712658	100	0.99	SAR	Alv	Ci	In	Sp	Pseudotontonia-simplicidens	3	0.03209	54	6302	1253	1293	28	566	23	8	47	4	38	0	32	74	39	8	39	0	170	0	0	173	37	275	30	4	45	49	65	0	106	345
OTU93	Euk	SAR	Alv	Ci	In	Sp_Strombidium	KP260510	100	0.98	SAR	Alv	Ci	In	Sp	Strombidium-capitatum	13	0.0801	23	6199	0	0	0	308	0	0	1	1	152	498	30	0	0	0	4	0	0	1086	0	1	0	0	100	0	19	0	0	56	17	279
OTU62	Euk	SAR	Str	PX	Ph	Ec_Stschapovia	AB117921	100	1	SAR	Str	PX	Ph	Di	Exallosorus-olsenii	4	0.00075	69	6171	517	456	626	90	18	80	11	22	30	125	18	79	0	77	15	77	72	2	206	91	57	149	48	14	121	71	18	122	18	71
OTU69	Euk	SAR	Alv	Ci	In	Sp_Codonaria	JQ408202	100	1	SAR	Alv	Ci	In	Sp	Schmidingerella-quequenensis	5	0.00076	39	5962	0	0	2	0	49	48	0	1	0	50	6	24	0	0	28	72	0	0	14	0	138	0	71	41	414	0	0	0	9	95
OTU78	Euk	SAR	Str	Ba	Fr	Fr_Tetracyclus	KJ577873	100	1	SAR	Str	Ba	Co	Th	Thalassiosira-mala	15	0.01418	72	5903	19	42	34	109	32	96	45	62	83	87	36	28	17	124	59	79	74	18	64	107	155	213	66	17	68	89	73	71	31	19
OTU82	Euk	SAR	Alv	Ci	In	Sp_Strombidium	KJ737432	100	0.98	SAR	Alv	Ci	In	Sp	Strombidium-paracalkinsi	4	0.022	41	5801	695	466	1522	97	67	194	54	21	15	0	130	1	215	12	7	0	44	12	19	166	47	208	16	163	155	27	41	0	0	469
OTU76	Euk	SAR	Rhi	Ce	Im	Si_Peregrinia	DQ211593	100	0.91	SAR	Rhi	Ce	Im	Si	Peregrinia-clavideferens	4	0.1159	66	5543	25	4	175	333	21	16	22	41	50	43	39	63	48	11	228	4	80	102	22	25	203	143	22	46	47	90	105	66	28	3
OTU45	Euk	SAR	Str	Di	Pe	Pt_Pteridomonas	KM516203	100	1	SAR	Str	Di	Pe	Pt	Pteridomonas-danica	3	0.00907	60	5322	0	0	0	0	105	49	137	46	81	6	154	0	68	42	193	0	64	0	0	51	100	0	43	130	11	75	85	0	104	0
OTU77	Euk	SAR	Str	Sc		_Schizocladia	AB085614	100	0.89	SAR	Rhi	Po	Sp	Sp	Spongocore-puella	2	0.43304	72	5220	177	115	93	2	82	76	100	28	93	27	56	17	135	23	45	145	115	8	103	53	102	29	84	84	22	88	109	9	107	5
OTU75	Euk	SAR	Alv	Di	Sy	Am_Amoebophrya	AY775284	100	0.94	SAR	Alv	Di	Sy	Am	Amoebophrya-sp	16	0.13619	70	4969	69	8	22	36	106	18	103	15	239	17	115	10	163	17	128	5	149	67	78	43	182	16	63	51	12	191	95	13	128	6
OTU80	Euk	SAR	Rhi	Ce	Im	Si_Corythion	EF456751	100	0.97	SAR	Rhi	Ce	Ce	Ce	Massisteria-sp	9	0.12931	71	4890	171	0	31	32	28	68	44	17	26	60	40	1	50	29	65	25	37	4	44	45	70	16	60	12	52	65	35	24	67	42
OTU81	Euk	SAR	Alv	Ci	In	Li_Askenasia	EU024989	100	0.97	SAR	Alv	Ci	In	Li	Cyclotrichium-cyclokaryon	4	0.05459	57	4792	0	0	171	79	78	39	82	0	8	0	243	0	199	50	69	0	74	466	0	50	56	0	195	87	22	152	78	0	149	39
OTU94	Euk	SAR	Rhi	Ce	Im	Si_Sphenoderia	KF539409	100	0.99	SAR	Rhi	Ce	Im	Si	Cyphoderia-major	11	0.1189	71	4717	0	8	15	18	57	42	30	60	181	47	65	32	51	64	63	52	54	22	6	54	49	19	121	22	26	78	50	35	72	72
OTU84	Euk	SAR	Alv	Ci	In	Sp_Tintinnopsis	AB640668	100	1	SAR	Alv	Ci	In	Sp	Codonellopsis-morchella	6	0.02296	37	4309	0	48	28	0	0	7	0	4	0	0	32	10	0	335	9	146	0	0	24	55	0	133	53	788	0	11	0	228	0	0
OTU83	Euk	SAR	Rhi	Ce	Pl	Pl_Phagomyxa	AF310903	100	0.97	SAR	Rhi	Ce	Pl	Pl	Spongospora-subterranea	11	0.09547	48	4235	0	1	31	135	49	18	2	0	10	36	17	0	83	1	0	1	0	0	1	0	69	0	41	3	0	14	32	0	0	1
OTU86	Euk	SAR	Str	PX	Xa	Mi_Botryochloris	AJ579341	100	0.96	SAR	Str	Bl			Blastocystis-cycluri	7	0.32732	71	4234	73	0	39	48	40	43	92	18	64	13	41	43	61	48	18	28	62	57	171	54	41	4	15	44	26	43	55	6	90	45
OTU85	Euk	SAR	Alv	Ci	In	Sp_Strobilidium	AF399123	100	1	SAR	Alv	Ci	In	Sp	Strobilidium-sp	3	0.02727	65	4073	0	71	60	56	56	120	50	73	42	58	115	238	10	6	35	3	53	53	47	148	78	25	110	155	90	76	34	111	7	2
OTU92	Euk	SAR	Str	Ba	Co	Ch_Chaetoceros	JF794044	100	0.98	SAR	Str	Ba	Co	Ch	Chaetoceros-muellerii	4	0.02951	61	3701	0	0	42	0	1	106	0	109	24	229	9	110	3	166	8	167	0	15	4	76	3	120	35	84	57	14	12	126	0	50
OTU95	Euk	SAR	Alv	Ci	In	Sp_Parastrombidinopsis	AJ786648	100	1	SAR	Alv	Ci	In	Sp	Parastrombidinopsis-shimi	3	0.00992	42	3623	0	233	408	10	0	0	55	144	3	11	0	24	68	0	12	236	43	0	0	0	123	25	58	0	0	0	0	0	10	92
OTU87	Euk	SAR	Alv	Di	Gy	Gy_Gyrodinium	AB120001	100	1	SAR	Alv	Di	Gy	Gy	Gyrodinium-cf	5	0.0011	71	3525	5	189	122	23	10	45	38	34	62	37	12	20	20	23	31	176	47	0	96	56	25	8	2	82	51	102	1	32	11	101
OTU134	Euk	SAR	Alv	Ci	In	Pr_Pelagothrix	AB486009	100	0.99	SAR	Alv	Ci	In	Pr	Prorodon-viridis	13	0.00773	52	3478	17	3	2	65	60	5	16	0	8	4	184	0	98	18	2	0	116	17	0	25	98	0	9	0	5	64	74	0	26	0
OTU96	Euk	SAR	Str	Ch	Ch	Ch_Chrysocapsa	EF165145	100	0.92	SAR	Str				Leukarachnion-sp	4	0.22044	60	3299	29	0	3	21	96	14	87	0	95	39	73	8	65	5	69	0	67	20	0	14	76	0	7	0	3	97	91	9	73	3
OTU97	Euk	SAR	Str	Ba	Ba	Ba_Fragilariopsis	KJ866919	100	1	SAR	Str	Ba	Ba	Ba	Pseudo-nitzschia-pungens	2	0.00393	71	3145	0	8	83	3	61	34	55	111	40	60	24	11	28	55	83	5	21	74	72	70	42	40	12	20	25	55	46	60	12	35
OTU90	Euk	SAR	Rhi	Ce	Th	Eb_Ebria	DQ303923	100	0.93	SAR	Rhi	un			Dimorpha-like-sp	5	0.03926	62	3067	0	50	50	0	2	29	1	115	2	22	11	41	16	50	0	91	7	1	11	67	11	98	5	50	53	43	2	87	1	53
OTU108	Euk	SAR	Alv	Di	Gy	Ka_Takayama	HM067010	100	1	SAR	Alv	Di	Gy	Ka	Karenia-bidigitata	4	0.0068	66	2512	182	16	0	190	23	3	37	14	59	2	60	1	10	9	69	1	48	119	16	7	98	1	21	15	7	84	69	1	27	6
OTU104	Euk	SAR	Str	In		_Incisomonas	JN848814	100	0.99	SAR	Str	In			Incisomonas-marina	5	0.00344	68	2461	27	9	10	54	43	26	53	10	83	2	42	17	43	12	70	35	37	194	0	22	9	3	7	0	11	19	68	29	36	3
OTU111	Euk	SAR	Str	PX	Xa	Mi_Chlorellidium	FJ030892	100	0.99	SAR	Str	PX	Xa	Mi	Botryidiopsidaceae-sp	4	0.00071	71	2439	26	5	9	129	22	45	11	47	38	19	10	37	8	50	17	10	27	41	29	25	25	225	2	24	7	16	24	18	46	100
OTU106	Euk	SAR	Alv	Ci	In	Ol_Myxophyllum	JQ956547	100	1	SAR	Alv	Ci	In	Ol	Entorhipidium-tenue	8	0.00073	55	2331	455	0	0	25	33	0	42	64	54	0	37	100	33	20	61	30	53	0	1	0	5	9	35	0	25	7	41	29	6	0
OTU118	Euk	SAR	Alv	Ci	In	Sp_Laboea	AF399154	100	0.99	SAR	Alv	Ci	In	Sp	Laboea-strobila	6	0.05206	70	2294	62	14	13	8	65	49	43	65	8	19	46	37	28	16	23	34	91	6	1	82	28	48	114	138	110	44	60	9	25	32
OTU120	Euk	SAR	Alv	Ci	In	Sp_Varistrombidium	DQ811090	100	0.9	SAR	Alv	Ci	In	Sp	Strombidium-capitatum	12	0.21129	14	2253	1160	63	53	770	0	0	0	0	2	0	1	0	0	0	0	0	0	0	0	0	0	0	0	0	0	0	3	52	0	0
OTU115	Euk	SAR	Str	Ba	Ba	Ba_Amphora	KJ463430	100	0.91	SAR	Str	Ba	Me	Bi	Talaroneis-posidoniae	3	0.12816	56	2236	0	8	0	37	63	3	50	0	92	1	66	0	34	2	47	0	22	0	0	4	54	0	29	3	0	31	46	0	82	6
OTU112	Euk	SAR	Alv	Ci	In	Ol_Miamiensis	JN885091	100	1	SAR	Alv	Ci	In	Ol	Entorhipidium-tenue	9	0.00073	53	2226	0	0	134	0	73	36	52	0	68	16	45	9	50	0	23	15	21	0	0	35	96	5	69	0	1	29	18	0	42	0
OTU119	Euk	SAR	Str	Ba	Me	Bi_Terpsinoe	KJ577872	100	0.99	SAR	Str	Ba	Co	Rh	Proboscia-indica	9	0.08217	68	2194	0	14	8	0	4	91	9	103	16	35	5	78	0	96	6	67	4	3	46	99	2	58	4	89	35	1	5	56	9	62
OTU114	Euk	SAR	Alv	Ci	In	Sp_Eutintinnus	KU715759	100	1	SAR	Alv	Ci	In	Sp	Eutintinnus-cf	4	0.0223	22	2193	0	0	0	0	0	0	0	0	0	0	0	0	121	0	12	45	0	95	0	310	29	174	0	0	163	15	0	0	5	0
OTU113	Euk	SAR	Str	Ba	Co	Th_Cyclotella	DQ514858	100	0.93	SAR	Str	Ba	Ba	Ba	Amphora-commutata	11	0.08902	64	2178	33	1	0	7	31	17	61	2	36	0	69	5	46	20	12	3	29	18	2	13	29	1	26	10	6	47	68	0	49	1
OTU101	Euk	SAR	Alv	Ci	un	_Ciliate	AM412525	100	1	SAR	Alv	Ci	un		Ciliate-sp	6	0.03082	21	2168	0	0	0	0	0	15	45	0	46	0	322	1	75	28	0	1	519	2	0	375	0	0	9	0	0	0	251	14	0	0
OTU107	Euk	SAR	Rhi	Ce	Th	Le_Lecythium	KP728379	100	0.96	SAR	Rhi	un			Dimorpha-like-sp	6	0.03979	62	1991	1	0	66	57	3	12	2	146	3	35	8	37	0	41	6	74	12	0	0	31	19	14	0	29	31	26	9	9	27	11
OTU123	Euk	SAR	Alv	Ci	In	Sp_Strombidium	KM084726	100	1	SAR	Alv	Ci	In	Sp	Strombidium-chlorophilum	2	0.01372	32	1977	9	20	24	0	0	0	108	39	54	45	0	0	0	58	0	75	300	0	0	5	69	0	4	0	0	0	126	0	115	0
OTU74	Euk	SAR	Alv	Ci	In	Sp_Strombidium	KJ737432	100	0.99	SAR	Alv	Ci	In	Sp	Oligotrichia-sp	4	0.06669	49	1965	5	2	1	12	30	24	24	0	81	28	130	44	12	0	0	0	25	0	0	6	2	0	27	72	6	11	7	0	19	1
OTU109	Euk	SAR	Rhi	Ce	Pl	Pl_Phagomyxa	AF310903	100	0.97	SAR	Rhi	Ce	Pl	Pl	Spongospora-subterranea	11	0.09586	45	1959	15	0	121	0	0	18	0	41	0	5	29	1	122	0	198	0	74	0	0	19	4	0	0	14	0	33	14	7	0	1
OTU139	Euk	SAR	Alv	Ci	In	Sp_Tintinnidium	JN831801	100	1	SAR	Alv	Ci	In	Sp	Tintinnidium-sp	2	0.00963	4	1922	1	0	1810	0	0	0	0	0	0	0	0	0	0	0	0	0	0	0	0	0	0	0	0	0	0	0	0	0	0	0
OTU129	Euk	SAR	Alv	Ci	In	Sp_Holosticha	DQ059583	100	1	SAR	Alv	Ci	In	Sp	Holosticha-diademata	5	0.0007	19	1742	0	747	0	2	0	0	0	0	0	0	0	3	0	4	0	0	32	0	0	0	0	511	0	0	0	58	0	0	20	99
OTU125	Euk	SAR	Str	Di	Pe	Ap_Apedinella	HQ710559	100	0.98	SAR	Str	Di	Rh	Rh	Rhizochromulina-cf	16	0.0641	56	1679	0	0	1	0	0	1	7	0	1	1	2	2	0	0	10	1	32	153	45	3	57	2	93	26	16	165	0	0	2	0
OTU105	Euk	SAR	Str	Ba	Fr	Fr_Licmophora	JN975248	100	0.99	SAR	Str	Ba	Fr	Fr	Licmophora-remulus	13	0.00614	51	1662	0	1	22	12	0	28	9	20	0	35	2	39	1	20	0	22	1	0	101	27	10	61	0	66	5	0	1	7	0	14
OTU131	Euk	SAR	Rhi	Ce	Ce	Ce_Massisteria	AF174370	100	0.94	SAR	Rhi	Ce	Im	Si	Trachelocorythion-pulchellum	4	0.07108	66	1660	2	49	137	67	4	36	15	46	3	54	11	32	0	4	14	18	7	9	114	31	6	20	0	0	35	15	7	12	41	6
OTU152	Euk	SAR	Str	Ba	Co	Th_Thalassiosira	KU352756	100	0.96	SAR	Str	Ba	Fr	Fr	Licmophora-remulus	18	0.08684	56	1609	0	6	11	0	1	59	1	72	2	61	2	59	0	83	2	44	0	1	34	41	2	24	1	67	50	2	3	62	1	40
OTU116	Euk	SAR	Str	Ba	Co	Co_Planktoniella	HQ912562	100	0.92	SAR	Str	Ba	Ba	Ba	Amphora-commutata	5	0.06468	71	1608	5	8	22	9	40	29	28	9	44	13	15	14	19	12	1	33	38	7	35	17	30	28	27	38	21	19	39	8	30	11
OTU133	Euk	SAR	Str	So		_Solenicola	HM163290	100	0.95	SAR	Str	So			Solenicola-setigera	3	0.02766	59	1598	3	0	25	76	15	14	31	1	2	5	56	0	2	10	51	1	59	129	0	11	34	0	21	2	1	22	15	3	38	0
OTU100	Euk	SAR	Str	Ba	Ba	Ba_Gyrosigma	KM999005	100	1	SAR	Str	Ba	Ba	Ba	Pleurosigma-planktonicum	5	0.00104	51	1587	0	10	2	0	0	26	0	4	1	22	0	79	0	46	0	117	0	0	10	17	0	31	0	4	21	0	4	47	4	21
OTU130	Euk	SAR	Str	Sc		_Schizocladia	AB085614	100	0.89	SAR	Rhi	Ac	Sy	Am	Amphibelone-cultellata	5	0.42623	66	1562	3	11	0	23	28	45	13	6	11	10	11	16	3	11	71	13	25	47	0	17	9	2	33	4	10	48	28	3	48	3
OTU149	Euk	SAR	Str	Ba	Ba	Ba_Epithemia	HQ912409	100	0.98	SAR	Str	PX	Xa	Mi	Botryidiopsidaceae-sp	6	0.00071	60	1500	2	6	18	0	1	44	8	73	2	18	4	27	4	60	2	41	3	0	35	37	5	48	1	80	49	6	0	76	3	31
OTU127	Euk	SAR	Str	Ba	Me	Bi_Cerataulina	HQ912669	100	1	SAR	Str	Ba	Me	Bi	Cerataulina-pelagica	3	0.00503	67	1434	0	9	61	0	8	34	26	4	28	16	21	12	8	19	13	16	22	20	21	47	63	52	7	27	24	6	35	28	20	26
OTU135	Euk	SAR	Alv	Ci	In	Sp_Pelagostrobilidium	FJ876963	100	0.99	SAR	Alv	Ci	In	Sp	Pelagostrobilidium-paraepacrum	2	0.0317	53	1414	29	114	86	68	0	0	2	45	34	1	14	0	13	0	3	48	9	0	1	6	21	6	43	117	61	20	20	31	0	51
OTU57	Euk	SAR	Rhi	Ce	Im	Si_Assulina	EF456749	100	0.95	SAR	Rhi	Ce	Im	Si	Cyphoderia-major	10	0.17775	50	1406	0	0	13	20	4	0	2	12	25	0	6	0	10	0	12	12	17	1	8	11	1	0	0	4	8	4	1	0	6	0
OTU136	Euk	SAR	Alv	Ci	In	Sp_Eutintinnus	AF399169	100	0.89	SAR	Str	Bi	un		Bicosoecida-sp	3	0.47213	36	1379	107	226	69	255	24	17	19	10	24	0	10	0	0	0	4	183	31	0	0	10	24	0	23	8	21	39	1	0	1	97
OTU126	Euk	SAR	Rhi	Ce	Th	Eb_Ebria	DQ303923	100	1	SAR	Rhi	Ce	Th		Mataza-hastifera	13	0.03573	47	1352	0	15	49	0	6	2	0	12	1	32	0	49	0	36	0	3	1	0	8	16	0	66	0	15	57	12	0	28	4	4
OTU184	Euk	SAR	Alv	Ci	In	Sp_Rimostrombidium	FJ876964	100	0.99	SAR	Alv	Ci	In	Sp	Rimostrombidium-veniliae	3	0.02403	20	1276	0	0	452	26	0	0	0	0	0	0	3	0	0	0	1	1	82	0	0	0	0	2	12	0	12	0	16	0	3	0
OTU143	Euk	SAR	Alv	Di	un	Pe_Pellucidodinium	LC027033	100	0.91	SAR	Alv	Di	Go	Go	Dapsilidinium-pastielsii	3	0.31448	62	1210	88	52	142	0	28	29	6	1	5	6	15	89	70	34	13	19	9	0	6	13	45	21	1	44	47	28	11	13	4	12
OTU145	Euk	SAR	Str	Ba	Ba	Ba_Halamphora	AB754832	100	0.92	SAR	Str	Ba	Ba	Ba	Phaeodactylum-sp	2	0.18949	52	1197	0	0	0	2	23	0	39	0	57	0	56	0	28	1	51	0	21	70	0	1	33	0	12	0	2	21	40	3	27	0
OTU159	Euk	SAR	Str	Ba	Co	Ch_Chaetoceros	KT860959	100	0.99	SAR	Str	Ba	Ba	Ba	Luticola-sp	3	0.07439	70	1159	6	31	32	1	10	22	2	69	7	15	9	14	4	29	5	52	6	17	18	33	14	28	8	40	27	6	9	34	18	20
OTU177	Euk	SAR	Str	Ba	Co	Th_Skeletonema	AJ632211	100	0.99	SAR	Str	Ba	Ba	Ba	Amphipleuraceae-sp	5	0.03355	53	1134	0	1	0	0	0	1	0	0	0	10	1	2	1	0	0	8	3	41	27	20	23	12	28	38	92	109	0	0	0	1
OTU140	Euk	SAR	Alv	Ci	In	Sp_Salpingella	EU399536	100	0.99	SAR	Alv	Ci	In	Sp	Salpingella-acuminata	2	0.00477	33	1131	67	11	0	0	0	118	5	16	0	33	1	116	0	21	0	19	26	0	5	21	0	13	0	57	33	25	0	0	0	12
OTU151	Euk	SAR	Str	Ba	Co	Rh_Rhizosolenia	JQ315679	100	1	SAR	Str	Ba	Co	Rh	Rhizosolenia-delicatula	2	0.00594	51	1069	0	22	7	0	1	9	3	5	0	39	0	2	1	2	0	80	4	0	27	22	0	21	0	2	22	0	0	24	3	6
OTU137	Euk	SAR	Str	Oo	Py	Py_Halophytophthora	HQ161106	100	0.94	SAR	Str	Bl			Blastocystis-cycluri	8	0.32732	55	1068	26	0	0	45	51	8	68	1	53	0	20	0	24	20	18	0	17	23	0	11	25	0	11	0	0	42	75	0	19	1
OTU148	Euk	SAR	Str	Ba	Co	Ch_Chaetoceros	KT860958	100	0.99	SAR	Str	Ba	Co	Ch	Chaetoceros-wighamii	2	0.00667	51	1057	0	0	5	4	0	9	89	15	24	20	1	0	0	12	7	0	4	0	0	18	0	82	5	4	9	4	1	46	4	0
OTU155	Euk	SAR	Str	Bi	Ca	Ps_Pseudobodo	KT860979	100	1	SAR	Str	Bi	Ca	Ca	Cafeteria-roenbergensis	2	0.02664	37	1049	3	0	0	0	0	0	0	0	25	0	0	0	0	2	0	0	0	24	2	0	0	0	1	0	0	0	27	7	0	0
OTU216	Euk	SAR	Str	Ba	Me	Bi_Hemiaulus	KC309496	100	0.95	SAR	Str	Ba	Fr	Fr	Licmophora-remulus	8	0.10737	45	1029	0	1	10	0	0	33	1	86	7	30	1	37	1	69	0	23	0	0	14	36	0	16	0	53	31	0	0	49	0	28
OTU192	Euk	SAR	Str	Ba	Co	Th_Roundia	KC284712	100	0.99	SAR	Str	Ba	Co	Ch	Chaetoceros-muellerii	7	0.08254	48	1024	0	9	12	0	0	45	0	55	0	20	0	33	0	40	0	47	1	1	18	35	3	20	3	69	40	6	2	44	3	21
OTU146	Euk	SAR	Alv	Ci	In	Ol_Paralembus	JQ956549	100	1	SAR	Alv	Ci	In	Ol	Entorhipidium-tenue	6	0.00073	23	1004	0	0	0	0	0	0	0	0	0	10	0	0	0	0	0	99	0	0	14	0	0	1	0	6	53	0	10	0	6	0
OTU132	Euk	SAR	Str	Ba	Fr	Fr_Pteroncola	AB430607	100	1	SAR	Str	Ba	Fr	Fr	Pteroncola-inane	2	0.00931	54	970	110	0	2	11	6	1	1	1	20	0	1	0	23	1	26	0	23	0	0	6	34	0	0	4	1	22	17	1	15	0
OTU141	Euk	SAR	Alv	Ci	In	Sp_Spirotrachelostyla	FJ870093	100	0.99	SAR	Alv	Ci	In	Sp	Spirotrachelostyla-tani	3	0.0095	24	952	0	0	0	0	0	0	0	0	0	0	195	2	1	0	4	0	9	0	0	33	27	0	2	6	0	75	0	3	0	0
OTU124	Euk	SAR	Alv	Ci	In	Sp_Oligotrichia	LN870057	100	1	SAR	Alv	Ci	In	Sp	Oligotrichia-sp	2	0.03113	29	936	1	326	0	1	1	17	0	0	0	0	0	0	1	0	0	0	0	1	0	1	0	282	0	0	30	0	1	59	0	45
OTU167	Euk	SAR	Rhi	Ce		_Auranticordis	EU484394	100	0.94	SAR	Rhi	Ce			Auranticordis-quadriverberis	8	0.11352	35	932	2	0	86	287	3	0	9	0	5	0	0	0	79	5	0	0	0	0	0	0	2	0	9	0	0	5	0	0	11	0
OTU153	Euk	SAR	Str	Ba	Co	Ch_Attheya	EF106785	100	1	SAR	Str	Ba	Co	Ch	Attheya-sp	3	0.02232	56	904	0	0	34	0	4	16	0	28	4	11	3	20	0	38	15	6	15	0	15	29	2	31	1	22	8	5	4	30	2	8
OTU128	Euk	SAR	Rhi	Ce	Im	Si_Sphenoderia	KF539409	100	0.99	SAR	Rhi	Ce	Th	Ch	Rhogostoma-minus	13	0.12546	57	862	0	4	58	3	3	9	5	11	21	37	11	0	5	0	0	17	4	2	4	4	6	6	3	0	5	4	20	3	8	0
OTU144	Euk	SAR	Str	Ba	Co	Rh_Rhizosolenia	AY485509	100	1	SAR	Str	Ba	Co	Rh	Rhizosolenia-similoides	2	0.05276	52	852	0	115	29	6	3	12	0	3	0	0	1	2	2	17	22	26	1	2	1	13	1	111	3	7	3	1	7	5	0	20
OTU169	Euk	SAR	Str	Ch	Ch	Di_Kephyrion	JF730878	100	0.94	SAR	Str	Ch	Ch	Di	Kephyrion-sp	2	0.064	47	834	673	2	5	1	3	2	0	2	0	0	3	2	2	0	1	1	1	0	2	0	1	0	0	2	3	3	3	2	0	1
OTU117	Euk	SAR	Str	Ba	Ba	Ba_Planothidium	KJ658411	100	1	SAR	Str	Ba	Me	Bi	Dimeregramma-sp	5	0.00106	54	833	0	0	44	0	6	25	0	19	7	8	4	0	2	14	1	83	3	0	0	8	0	10	0	4	3	5	1	12	0	3
OTU178	Euk	SAR	Str	Ba	Fr	Fr_Licmophora	AY633758	100	0.93	SAR	Str	Di	Rh	Rh	Rhizochromulina-cf	12	0.12325	43	803	0	0	2	7	39	0	19	0	43	0	33	1	16	0	31	0	19	7	0	0	28	1	14	0	0	11	32	0	22	0
OTU185	Euk	SAR	Str	Ch	Ch	Ch_Chrysowaernella	HQ710556	100	0.96	SAR	Str	PX	Ph	Sp	Choristocarpus-tenellus	2	0.07305	46	796	0	0	0	0	1	0	0	3	2	0	1	0	2	0	2	0	14	79	11	2	22	0	51	8	11	118	2	0	0	0
OTU142	Euk	SAR	Str	Oo	Ol	Ol_Olpidiopsis	KM210530	100	0.91	SAR	Str	Bi	Ca		Caecitellus-paraparvulus	5	0.31616	49	771	29	0	0	4	35	25	6	119	58	0	4	0	33	8	18	0	4	0	0	2	16	2	5	5	3	24	15	0	34	0
OTU102	Euk	SAR	Alv	Co	Co	_Colpodella	AF330214	100	0.96	SAR	Alv	Co	Co		Colpodella-tetrahymenae	3	0.0715	42	768	0	0	20	0	2	8	0	0	16	0	6	0	8	0	68	0	8	24	0	0	30	0	11	7	0	6	17	26	1	5
OTU171	Euk	SAR	Rhi	Ce	Im	Si_Euglypha	AJ418788	100	0.96	SAR	Rhi	Ce	Gy		Gymnophrys-sp	4	0.15006	10	768	0	371	0	0	7	0	0	0	0	0	0	0	0	2	0	0	0	0	0	0	96	0	0	0	0	0	34	28	0	197
OTU172	Euk	SAR	Rhi	Ce	Ce	Ce_Paracercomonas	FJ790727	100	0.98	SAR	Str	Ba	Ba	Ba	Pinnularia-brebissonii	2	0.05254	53	766	18	0	2	20	32	1	10	0	21	0	14	0	4	3	0	0	24	7	0	4	29	1	16	0	0	22	18	0	25	1
OTU176	Euk	SAR	Alv	Ci	In	Sp_Schmidingerothrix	FJ870085	100	0.99	SAR	Alv	Ci	In	Sp	Halteria-sp	3	0.0055	46	763	308	0	17	0	4	62	84	1	42	2	1	0	0	1	1	0	1	0	0	0	1	2	1	1	0	0	2	1	0	0
OTU170	Euk	SAR	Alv	Ci	In	Sp_Strombidium	KP260513	100	0.99	SAR	Alv	Ci	In	Sp	Strombidium-caudispina	9	0.05559	50	743	0	0	0	1	1	0	0	0	0	1	1	1	1	1	6	0	8	37	62	1	8	1	88	30	9	138	3	0	0	0
OTU174	Euk	SAR	Alv	Ci	In	Co_Sorogena	AF300286	100	0.87	SAR	Str	Ba	Ba	Ba	Frustulia-aotearoa	7	0.09495	52	733	3	0	18	85	9	14	55	10	10	3	21	0	9	0	17	2	6	22	0	6	18	0	3	5	0	23	26	7	19	0
OTU160	Euk	SAR	Alv	Ci	In	Ol_Anophryoides	U51554	100	1	SAR	Alv	Ci	In	Ol	Entorhipidium-tenue	10	0.00073	28	730	0	0	0	0	0	3	8	3	0	0	56	0	2	0	12	13	42	0	0	18	0	0	3	47	0	0	21	0	25	0
OTU179	Euk	SAR	Alv	Ci	In	Sp_Pseudotontonia	FJ422993	100	1	SAR	Alv	Ci	In	Sp	Pseudotontonia-simplicidens	2	0.00605	14	729	18	0	0	0	3	65	77	0	0	0	0	0	0	0	0	0	29	0	0	0	0	0	0	0	0	3	39	0	0	0
OTU193	Euk	SAR	Rhi	Ce	Ce	Ce_Paracercomonas	FJ790724	100	0.99	SAR	Rhi	Ce	Ce	Ce	Paracercomonas-oxoniensis	5	0.0229	52	712	1	0	1	4	16	2	20	12	38	0	11	0	3	1	5	0	24	1	0	8	29	0	0	0	3	36	7	0	44	0
OTU191	Euk	SAR	Str	Ba	Co	Ch_Chaetoceros	AB430592	100	0.99	SAR	Str	Ba	Co	Ch	Chaetoceros-radicans	8	0.08166	57	707	0	3	8	0	1	34	4	65	1	12	2	12	3	49	5	14	1	0	15	28	0	13	7	32	22	4	1	32	1	18
OTU138	Euk	SAR	Rhi	Ce	Th	Ch_Capsellina	GQ377676	100	0.97	SAR	Rhi	Ce	Th	Ch	Rhogostoma-minus	8	0.07806	46	702	0	62	45	0	0	2	0	13	4	0	1	5	0	16	6	0	3	5	0	19	2	1	36	2	7	0	0	24	0	2
OTU162	Euk	SAR	Str	Oo	Ol	Ol_Olpidiopsis	KM210530	100	0.91	SAR	Rhi	Fo	Mi	Mi	Peneroplis-sp	2	1.53411	51	678	0	0	0	15	9	10	27	1	9	3	21	1	12	3	7	0	11	6	3	1	13	0	5	1	2	5	31	1	29	46
OTU187	Euk	SAR	Rhi	Ce	Im	Si_Protaspis	FJ824122	100	0.95	SAR	Rhi	Ce	Im	Si	Protaspis-obliqua	4	0.09451	49	676	5	0	1	0	10	0	19	9	8	0	6	0	36	0	0	0	26	0	42	1	21	0	5	0	6	20	9	0	3	0
OTU150	Euk	SAR	Alv	Ci	In	Pr_Plagiopogon	KC771342	100	0.96	SAR	Alv	Ci	In	Na	Discotricha-papillifera	7	0.19884	21	674	0	0	0	0	2	37	0	0	0	1	20	14	0	10	27	0	0	192	0	0	22	55	112	0	7	34	0	0	0	0
OTU165	Euk	SAR	Alv	Ac		_Acavomonas	KF651077	100	0.94	SAR	Str	Ba	Fr	Fr	Licmophora-grandis	5	0.06245	58	650	36	18	18	0	10	7	0	0	4	35	1	17	5	12	2	3	2	0	0	0	17	9	1	7	5	4	0	27	0	27
OTU181	Euk	SAR	Rhi	Ce	Pl	Pl_Phagomyxa	AF310903	100	0.96	SAR	Rhi	Ce	Pl	Pl	Spongospora-subterranea	10	0.09481	6	649	0	227	0	0	0	0	0	0	0	0	0	0	0	0	0	0	17	0	0	0	0	0	0	0	29	0	0	0	0	349
OTU190	Euk	SAR	Rhi	Ce	Gl	Sa_Sandona	EU709138	100	0.88	SAR	Rhi	Ce	Ce	He	Bodomorpha-sp	3	0.22948	29	647	0	23	9	79	13	1	0	0	0	0	0	0	17	6	4	23	19	0	0	10	19	0	10	0	0	43	24	0	0	0
OTU186	Euk	SAR	Alv	Ci	In	Sp_Strombidium	JF791016	100	0.99	SAR	Alv	Ci	In	Sp	Strombidium-cf	4	0.04342	30	642	0	0	0	0	0	0	1	4	36	0	0	1	0	0	0	0	18	59	22	7	1	0	104	13	16	93	0	0	0	0
OTU180	Euk	SAR	Str	Ba	Me	Bi_Bellerochea	KJ577846	100	1	SAR	Str	Ba	Me	Me	Mediopyxis-helysia	2	0.00103	26	634	0	0	0	0	0	8	49	1	1	18	0	0	0	5	0	37	0	0	4	10	0	16	0	4	10	0	0	2	0	0
OTU198	Euk	SAR	Alv	Ci	In	Pr_Pelagothrix	AB486009	100	0.96	SAR	Alv	Ci	In	Li	Askenasia-sp	4	0.07123	24	617	0	0	4	37	0	0	0	0	0	0	0	64	0	0	0	0	20	9	94	11	19	0	0	22	31	3	49	0	0	0
OTU201	Euk	SAR	Alv	Ci	In	Pr_Plagiopogon	KC771342	100	0.97	SAR	Alv	Ci	In	Ol	Parauronema-virginianum	2	0.33913	28	603	0	0	0	0	13	15	0	0	34	0	18	35	41	0	4	0	20	0	0	2	3	0	64	0	0	55	20	0	15	0
OTU195	Euk	SAR	Alv	Ci	In	Li_Chaenea	HM140393	100	1	SAR	Alv	Ci	In	Li	Chaenea-vorax	3	0.04548	5	602	0	0	0	0	0	0	0	120	69	0	0	0	0	0	0	0	0	0	0	0	0	0	0	0	0	0	179	0	0	0
OTU175	Euk	SAR	Rhi	Ce	Th	Le_Lecythium	KP728379	100	0.99	SAR	Rhi	Ce	Th		Mataza-hastifera	10	0.03573	55	586	5	0	14	5	9	3	25	6	20	16	1	0	7	4	2	20	10	0	0	9	12	1	4	0	2	12	5	0	6	0
OTU182	Euk	SAR	Str	Di	Pe	Ap_Apedinella	HQ710559	100	0.97	SAR	Str	Di	Rh	Rh	Rhizochromulina-cf	15	0.08506	64	582	0	9	3	0	2	24	2	27	3	15	3	18	1	29	4	15	3	1	25	20	3	5	2	24	9	0	8	10	7	18
OTU158	Euk	SAR	Rhi	Ce	Pl	Pl_Woronina	KF111231	100	0.91	SAR	Rhi	Ce	Va	Va	Penardia-sp	4	0.26614	10	578	0	0	6	0	0	21	0	0	0	0	0	0	19	0	0	0	0	0	0	0	23	103	0	0	0	0	0	0	0	0
OTU197	Euk	SAR	Str	Ba	Ba	Ba_Navicula	KT072983	100	0.99	SAR	Str	Ba	Co	Ch	Chaetoceros-muellerii	3	0.14031	39	574	0	0	0	0	0	0	0	0	0	0	0	1	0	0	1	5	5	17	14	1	9	0	15	11	27	72	0	0	0	0
OTU199	Euk	SAR	Str	Sy	Sy	Ma_Mallomonas	KT852944	100	1	SAR	Str	Sy	Sy	Ma	Mallomonas-insignis	2	0.01856	34	567	288	67	5	0	1	0	55	0	1	1	0	1	1	0	1	0	0	0	2	0	0	0	1	0	0	3	0	31	1	5
OTU203	Euk	SAR	Str	Ba	Co	Rh_Guinardia	KC309536	100	0.98	SAR	Str	Ba	Co	Rh	Rhizosolenia-imbricata	2	0.07137	37	558	0	5	20	0	0	5	0	21	0	0	6	7	0	3	0	21	0	0	83	8	0	12	0	8	35	0	0	22	0	2
OTU277	Euk	SAR	Str	In		_Incisomonas	JN848814	100	1	SAR	Str	In			Incisomonas-marina	5	0.00344	54	557	48	0	22	1	5	3	5	4	1	0	1	4	0	1	11	53	2	0	19	5	0	0	2	6	0	11	3	4	8	0
OTU204	Euk	SAR	Rhi	Ce	Th	Le_Lecythium	KP728379	100	0.94	SAR	Rhi	Ce	Re	un	Reticulamoeba-sp	3	0.39334	10	553	448	0	16	14	0	0	0	0	0	13	0	0	0	0	0	0	0	0	0	0	13	0	0	0	0	0	0	0	0	0
OTU173	Euk	SAR	Str	Ba	Ba	Ba_Stauroneis	KM116116	100	0.95	SAR	Str	Ba	Co	Co	Ellerbeckia-sp	6	0.1983	27	550	0	128	14	0	0	0	0	0	11	2	0	0	0	14	0	42	0	0	0	6	43	1	0	0	4	0	0	65	0	0
OTU200	Euk	SAR	Str	La	Th	Ap_Aplanochytrium	AJ519935	100	0.98	SAR	Rhi	Ce	Im	Si	Euglypha-tuberculata	2	0.36148	42	533	0	29	0	0	3	3	0	13	9	0	9	0	1	1	13	0	14	12	0	2	0	3	14	9	19	1	35	8	35	0
OTU215	Euk	SAR	Alv	Di	Gy	Gy_Moestrupia	LC025882	100	0.99	SAR	Alv	Di	Gy	Gy	Moestrupia-sp	2	0.04544	49	530	19	1	31	97	1	0	3	8	4	1	7	4	9	0	2	0	17	0	0	6	5	0	1	3	2	14	2	0	6	0
OTU202	Euk	SAR	Str	Ba	Ba	un_Bacillariophyceae	KT861013	100	0.99	SAR	Str	Ba	Me	Bi	Plagiogramma-atomus	3	0.00847	20	520	0	129	0	0	2	0	0	1	0	2	0	13	0	2	0	0	0	0	0	0	14	120	0	6	0	1	0	0	3	77
OTU213	Euk	SAR	Rhi	Ce	Im	Ma_Abollifer	LC006124	100	1	SAR	Rhi	Ce	Im	Ma	Abollifer-globosa	6	0.04499	46	517	0	0	1	0	0	2	5	0	3	32	2	4	5	1	29	0	3	23	0	10	3	0	17	0	5	12	7	1	5	0
OTU214	Euk	SAR	Alv	Ci	un	_Ciliate	AM412525	100	0.96	SAR	Alv	Ci	un		Ciliate-sp	6	0.05001	46	507	22	0	0	43	3	2	11	0	39	0	2	3	34	6	11	0	3	1	0	3	2	0	4	2	2	14	3	0	9	6
OTU188	Euk	SAR	Alv	Ci	In	Ol_Entorhipidium	AY541688	100	1	SAR	Alv	Ci	In	Ol	Entorhipidium-tenue	4	0.00073	20	506	0	0	0	0	0	0	3	0	0	0	3	0	0	1	0	0	0	0	0	8	0	0	0	0	0	11	11	0	20	0
OTU217	Euk	SAR	Rhi	Ce	Ce	Ce_Paracercomonas	FJ790724	100	0.98	SAR	Rhi	Ce	Ce	Ce	Paracercomonas-oxoniensis	4	0.04266	44	497	17	3	6	36	20	0	9	0	10	0	10	0	6	3	12	0	6	10	0	1	2	4	0	0	0	12	22	0	2	3
OTU237	Euk	SAR	Str	Ba	Co	Co_Paralia	HQ912573	100	1	SAR	Str	Ba	Co	Co	Stephanopyxis-nipponica	4	0.01668	31	479	0	0	14	0	0	3	0	0	0	7	0	11	5	6	61	8	0	0	99	2	0	0	0	0	2	0	0	3	1	0
OTU205	Euk	SAR	Str	Ba	Ba	Ba_Navicula	KT072983	100	0.98	SAR	Str	Ba	Me	Bi	Psammoneis-obaidii	3	0.00645	45	478	0	6	25	0	2	8	0	10	0	0	10	57	5	9	0	0	0	0	22	10	3	12	7	0	15	0	9	11	0	1
OTU208	Euk	SAR	Alv	Ci	In	Co_Colpoda	KJ607915	100	0.98	SAR	Alv	Ci	In	Co	Pseudocyrtolophosis-alpestris	3	0.04668	16	473	0	0	0	2	0	0	0	0	0	0	0	0	0	0	0	0	0	0	0	0	1	21	0	0	0	14	0	0	0	125
OTU219	Euk	SAR	Alv	Ci	In	Li_Askenasia	EU024989	100	0.92	SAR	Alv	Ci	In	Li	Askenasia-sp	4	0.11067	28	454	88	0	0	23	16	0	6	27	4	0	18	0	0	0	0	0	5	0	0	7	0	0	14	0	0	21	7	16	0	0
OTU221	Euk	SAR	Rhi	Ce	Im	Si_Sphenoderia	KF539409	100	0.89	SAR	Rhi	Ce	Im	Ma	Pseudopirsonia-mucosa	9	0.2353	53	453	0	0	0	0	6	5	2	0	0	0	4	3	1	4	4	0	3	0	0	3	13	26	0	0	4	10	18	0	3	17
OTU210	Euk	SAR	Rhi	Ce	Im	Si_Sphenoderia	KF539409	100	0.94	SAR	Rhi	Ce	Im	Si	Ovulinata-parva	5	0.12042	45	453	0	0	4	0	8	14	17	0	15	0	3	0	13	10	2	0	7	19	0	7	10	0	0	0	0	9	7	9	8	5
OTU223	Euk	SAR	Str	Di	Pe	Ap_Apedinella	HQ710559	100	0.99	SAR	Str	Di	Rh	Rh	Rhizochromulina-cf	14	0.04362	27	450	0	0	8	5	10	0	42	0	0	0	3	1	0	0	0	0	2	0	0	10	0	0	0	0	0	0	3	0	1	32
OTU241	Euk	SAR	Alv	Co	Co	_Colponema	KJ598081	100	0.96	SAR	Alv	Co	Co		Colponema-vietnamica	4	0.11374	32	431	0	116	1	7	5	0	1	0	0	0	1	0	2	2	0	0	2	2	1	0	90	0	0	0	0	0	3	1	79	15
OTU284	Euk	SAR	Alv	Ci	In	Ol_Uronema	KF840517	100	1	SAR	Alv	Ci	In	Ol	Parauronema-virginianum	2	0.00846	21	428	0	0	0	0	0	0	0	0	0	0	2	0	0	0	0	0	1	0	0	0	10	58	8	0	0	0	0	6	0	0
OTU227	Euk	SAR	Str	Sc		_Schizocladia	AB085614	100	0.89	SAR	Rhi	Ce	Im	Si	Cyphoderia-major	15	0.35211	42	421	2	0	0	0	4	2	12	1	0	2	2	0	12	5	4	0	3	0	0	4	8	2	11	0	2	52	20	5	27	0
OTU222	Euk	SAR	Rhi	Ce	Th	Le_Lecythium	KP728379	100	0.98	SAR	Rhi	Ce	Th		Mataza-hastifera	9	0.03573	51	420	0	0	17	18	6	0	4	2	4	2	11	6	26	7	14	2	12	0	0	3	14	0	4	5	4	1	1	2	5	0
OTU224	Euk	SAR	Str	Ba	Co	Rh_Guinardia	KC309536	100	0.96	SAR	Str	Ba	Co	Rh	Guinardia-delicatula	4	0.11865	37	388	0	2	3	0	0	11	3	9	0	9	0	18	0	14	0	16	0	0	26	6	0	10	0	18	12	0	0	20	0	13
OTU189	Euk	SAR	Str	Ba	Co	Co_Actinoptychus	KJ577842	100	0.94	SAR	Str	Ba	Ba	Ba	Frustulia-aotearoa	4	0.03028	43	387	0	0	38	0	0	2	2	0	0	4	0	0	0	1	14	0	2	0	0	5	7	3	2	0	11	13	1	9	3	0
OTU228	Euk	SAR	Str	Pi		_Pirsonia	AJ561115	100	0.9	SAR	Str	Bi	Ca		Caecitellus-paraparvulus	3	0.37519	37	379	0	0	0	0	0	0	0	0	1	0	1	1	0	0	2	0	6	61	8	0	11	1	19	6	2	57	0	0	0	0
OTU242	Euk	SAR	Alv	Ci	In	Sp_Novistrombidium	FJ422990	100	0.97	SAR	Alv	Ci	In	Sp	Strombidium-caudispina	8	0.05561	14	373	57	0	0	0	19	0	0	0	0	0	2	7	73	2	0	0	0	0	0	0	0	0	58	0	0	36	0	0	0	0
OTU230	Euk	SAR	Alv	Ci	In	Ol_Cinetochilum	FJ870103	100	0.98	SAR	Alv	Ci	In	Ol	Cinetochilum-ovale	3	0.02754	20	372	0	0	0	99	5	8	2	0	0	0	3	0	0	6	21	0	7	1	0	12	0	0	0	0	0	0	21	0	0	0
OTU233	Euk	SAR	Str	Ba	Ba	Ba_Navicula	KT072983	100	0.96	SAR	Str	Ba	Fr	Fr	Licmophora-grandis	5	0.0947	51	358	0	2	0	0	1	5	1	12	2	9	0	1	0	11	0	9	2	0	7	2	1	6	0	8	10	3	0	9	0	11
OTU260	Euk	SAR	Str	PX	Xa	Tr_Heterococcus	JN573871	100	0.98	SAR	Str	PX	Xa	Mi	Botryidiopsidaceae-sp	7	0.00071	47	355	0	0	5	0	0	13	0	20	4	21	2	5	2	20	1	21	0	0	0	10	0	5	3	7	12	1	2	13	0	9
OTU292	Euk	SAR	Str	Ba	Co	Th_Thalassiosira	EF585582	100	0.96	SAR	Str	Ba	Co	Th	Thalassiosira-weissflogii	3	0.10789	29	352	0	0	0	0	1	13	0	2	0	0	0	22	0	5	0	0	0	0	0	6	0	3	0	7	21	0	0	12	0	0
OTU238	Euk	SAR	Str	Pe	un	_Pelagophyceae	JN934687	100	1	SAR	Str	Pe	un		Pelagophyceae-sp	4	0.00662	15	349	0	0	0	0	1	2	0	0	0	37	11	0	3	25	0	0	0	0	0	0	0	0	0	0	8	0	0	0	0	0
OTU220	Euk	SAR	Str	Ba	Fr	Fr_Tetracyclus	KJ577873	100	0.98	SAR	Str	Ba	Co	Th	Thalassiosira-mala	13	0.01418	42	344	0	0	0	0	1	3	4	0	9	1	0	0	3	6	0	0	1	0	2	3	17	36	0	0	3	14	1	8	3	5
OTU168	Euk	SAR	Rhi	Ce	Im	Ma_Pseudopirsonia	AJ561116	100	0.98	SAR	Rhi	Ce	Im	Ma	Pseudopirsonia-mucosa	8	0.05892	45	340	0	8	19	1	1	5	0	4	10	0	0	10	1	10	0	0	0	0	1	6	0	18	0	12	1	4	1	1	3	0
OTU258	Euk	SAR	Rhi	Ce	Im	Si_Thaumatomastigidae	KC243117	100	1	SAR	Rhi	Ce	Im	Si	Thaumatomonas-sp	5	0.00147	41	338	0	0	0	0	0	6	11	0	5	7	0	0	0	3	0	0	1	0	0	2	0	28	0	0	10	12	2	6	0	0
OTU255	Euk	SAR	Alv	Di	Sy	Sy_Hematodinium	EU856716	100	0.84	SAR	Alv	Di	Sy	Am	Amoebophrya-sp	16	0.34372	24	338	0	0	72	0	0	4	5	8	0	9	0	0	0	25	14	0	0	0	0	1	17	10	3	0	28	0	0	0	0	0
OTU239	Euk	SAR	Rhi	Ce	Th	Cr_Cryothecomonas	AF290539	100	1	SAR	Rhi	Ce	Th	Cr	Cryothecomonas-aestivalis	5	0.0129	35	330	2	0	0	0	0	1	1	0	2	0	4	0	0	0	10	0	3	0	0	0	35	0	12	0	2	7	7	0	18	0
OTU253	Euk	SAR	Alv	Di	Go	Am_Azadinium	JQ247707	100	0.97	SAR	Alv	Di	Bl	Bl	Blastodinium-sp	2	0.1444	39	328	13	0	9	2	10	0	2	0	9	0	2	0	0	0	0	0	5	3	1	1	1	0	67	0	6	2	1	5	6	2
OTU243	Euk	SAR	Rhi	Ce	Im	Ma_Abollifer	LC006124	100	0.98	SAR	Rhi	Ce	Im	Ma	Abollifer-globosa	5	0.04499	38	325	0	0	0	17	7	2	0	0	0	0	3	9	0	1	3	0	4	0	0	6	17	2	3	0	6	4	2	0	0	0
OTU249	Euk	SAR	Str	Ba	Ba	Ba_Fistulifera	KF417675	100	0.96	SAR	Rhi	Ce	Pl	Pl	Polymyxa-graminis	2	0.44022	7	321	0	139	0	0	0	0	0	0	0	0	0	0	0	0	0	0	0	0	0	0	73	0	0	0	0	0	0	0	22	52
OTU225	Euk	SAR	Alv	Ci	In	Sp_Anteholosticha	FJ775724	100	0.96	SAR	Alv	Ci	In	Sp	Anteholosticha-gracilis	2	0.06175	17	317	0	0	0	0	12	0	1	76	0	0	0	0	0	0	0	0	0	0	0	2	0	0	0	0	0	2	0	0	0	0
OTU254	Euk	SAR	Alv	Ci	In	Sp_Rimostrombidium	DQ986131	100	0.99	SAR	Alv	Ci	In	Sp	Rimostrombidium-lacustris	2	0.00998	2	295	294	0	0	0	0	0	0	0	0	0	0	0	0	0	0	0	0	0	0	0	1	0	0	0	0	0	0	0	0	0
OTU163	Euk	SAR	Rhi	Ce	Im	Si_Protaspis	FJ824125	100	0.95	SAR	Rhi	Ce	Th	Ch	Rhogostoma-minus	8	0.1278	12	294	0	0	0	0	0	0	0	0	0	0	0	0	0	0	0	9	0	0	0	7	0	0	0	0	12	0	0	0	0	0
OTU245	Euk	SAR	Str	Ba	Co	Rh_Guinardia	KC309536	100	0.99	SAR	Str	Ba	Co	Ch	Chaetoceros-muellerii	4	0.06232	33	269	0	5	9	0	0	10	0	9	0	0	0	6	0	7	0	22	0	0	9	10	0	4	0	19	8	0	0	18	0	9
OTU269	Euk	SAR	Str	Oo	Sa	Sa_Aquastella	KF294791	100	0.91	SAR	Str	Ca			Cantina-marsupialis	10	0.18402	35	268	13	0	0	32	5	0	12	0	4	0	3	0	0	0	1	0	6	14	0	1	23	0	2	0	0	8	1	0	9	0
OTU409	Euk	SAR	Str	Ba	Co	Ch_Chaetoceros	KF925340	100	0.96	SAR	Str	Ba	Ba	Ba	Fragilariopsis-cylindrus	4	0.07855	28	268	0	89	16	0	0	4	0	1	0	0	2	10	0	11	0	4	0	0	18	1	0	4	0	0	0	0	0	4	0	1
OTU194	Euk	SAR	Rhi	Ce	Ce	Ce_Massisteria	AF174370	100	1	SAR	Rhi	Ce	Ce	Ce	Massisteria-marina	2	0.00183	28	268	0	0	2	6	0	12	0	18	0	0	1	0	0	2	0	6	0	6	56	1	0	0	0	0	6	0	0	0	13	7
OTU275	Euk	SAR	Str	Pe	Pe	Pe_Pelagomonas	KT861109	100	0.98	SAR	Str	Ba	Ba	Ba	Pinnularia-acrosphaeria	2	0.13093	28	261	0	0	0	0	0	0	0	0	0	0	1	0	0	0	3	0	1	30	2	0	21	0	13	0	1	40	0	0	0	0
OTU252	Euk	SAR	Str	Ra	un	Ha_Haramonas	JX026932	100	0.93	SAR	Str	Ra	Ch	Ch	Heterosigma-akashiwo	4	0.11961	19	252	0	1	0	0	0	12	0	1	0	91	0	1	0	0	1	0	0	0	0	8	0	0	0	0	0	1	10	0	3	0
OTU367	Euk	SAR	Alv	Di	Pe	Di_Preperidinium	AB716910	100	0.96	SAR	Alv	Di	Pe	Oo	Oodinium-pouchetii	3	0.16885	47	251	5	0	0	0	4	5	3	0	1	0	9	8	11	3	1	0	11	0	1	9	1	0	2	3	3	17	2	1	11	0
OTU280	Euk	SAR	Alv	Ci	In	Sp_Eutintinnus	AF399169	100	0.89	SAR	Alv	Ci	In	Sp	Parastrombidinopsis-shimi	5	0.22581	30	250	0	1	31	13	2	0	12	0	2	0	7	0	1	0	0	0	6	0	0	2	0	0	0	14	7	6	13	12	4	0
OTU264	Euk	SAR	Alv	Ci	In	Sp_Helicostomella	AB640639	100	0.99	SAR	Alv	Ci	In	Sp	Parundella-sp	5	0.0544	40	249	0	2	0	0	0	0	0	6	0	3	0	2	0	2	0	1	1	24	7	5	4	1	12	27	29	4	0	0	0	1
OTU270	Euk	SAR	Rhi	Ce	Pl	Pl_Phagomyxa	AF310903	100	0.95	SAR	Rhi	Ce	Pl	Pl	Polymyxa-graminis	2	0.41157	9	247	52	0	0	118	4	0	0	0	0	0	1	0	0	0	0	0	0	0	0	41	0	0	0	0	0	0	0	0	0	0
OTU248	Euk	SAR	Rhi	Ce	Th	Le_Lecythium	KP728379	100	0.96	SAR	Rhi	Ce	Th	Tr	Trachyrhizium-urniformis	13	0.05873	38	245	0	0	12	0	3	0	2	0	1	0	5	0	5	0	0	0	2	0	2	2	9	24	0	1	2	8	11	3	0	0
OTU259	Euk	SAR	Str	Ba	Co	Rh_Guinardia	KC309536	100	0.99	SAR	Str	Ba	Co	Rh	Guinardia-striata	4	0.04428	33	244	0	0	0	0	0	0	0	1	0	1	0	2	0	1	2	4	3	2	29	2	1	5	3	10	23	6	0	0	0	0
OTU257	Euk	SAR	Alv	Ci	In	Li_Loxophyllum	KT880228	100	0.96	SAR	Alv	Ci	In	Li	Loxophyllum-perihoplophorum	2	0.07425	19	243	0	0	0	0	0	0	3	0	0	0	27	1	0	0	0	0	14	0	0	0	0	0	18	0	0	0	3	5	0	0
OTU236	Euk	SAR	Rhi	Ce	Im	Si_Thaumatomonas	HQ121429	100	0.87	SAR	Rhi	Ce	Re	un	Reticulamoeba-sp	3	0.28351	33	241	2	0	1	7	4	7	1	0	2	0	1	0	6	0	23	0	2	34	0	4	0	0	0	1	0	5	5	0	2	4
OTU273	Euk	SAR	Alv	Ci	In	Ol_Homalogastra	EF158848	100	0.99	SAR	Alv	Ci	In	Ol	Entorhipidium-tenue	5	0.00073	5	241	0	0	0	0	0	0	0	30	0	0	0	0	0	0	0	0	0	0	0	0	0	0	0	0	9	0	0	0	0	0
OTU263	Euk	SAR	Rhi	Ce	Th	Ps_Pseudodifflugia	AJ418794	100	0.97	SAR	Rhi	Ce	Th	Ps	Pseudodifflugia-cf	4	0.06172	25	233	107	0	16	2	2	0	12	8	0	0	0	0	12	0	2	0	11	0	0	0	2	2	3	0	0	0	0	0	0	0
OTU287	Euk	SAR	Alv	Ci	In	Sp_Strombidium	KP260510	100	0.99	SAR	Alv	Ci	In	Sp	Strombidium-capitatum	11	0.09369	26	228	0	0	0	1	0	0	0	0	0	0	0	2	0	0	0	1	2	0	0	3	4	1	39	9	11	76	0	0	0	0
OTU271	Euk	SAR	Alv	Di	Gy	Gy_Gyrodinium	AB120004	100	0.94	SAR	Alv	Di	Gy	Gy	Gyrodinium-rubrum	2	0.08753	2	226	0	32	0	0	0	0	0	0	0	0	0	0	0	0	0	0	0	0	0	0	0	194	0	0	0	0	0	0	0	0
OTU279	Euk	SAR	Str	Ba	Ba	Ba_Navicula	KT072983	100	0.95	SAR	Str	Ba	Fr	Fr	Licmophora-grandis	6	0.13736	36	225	0	0	3	0	0	3	2	19	1	2	0	4	0	4	0	5	0	0	1	6	0	1	0	3	10	1	0	6	0	8
OTU261	Euk	SAR	Rhi	Ce	Im	Si_Sphenoderia	KF539409	100	0.93	SAR	Rhi	Ce	Im	Ma	Pseudopirsonia-mucosa	8	0.19431	19	222	0	0	0	0	4	0	18	0	1	20	3	0	5	0	21	0	0	0	0	0	1	0	0	0	0	0	0	0	0	0
OTU286	Euk	SAR	Alv	Di	Sy	Am_Amoebophrya	AY775284	100	0.92	SAR	Alv	Di	Sy	Am	Amoebophrya-sp	15	0.18349	37	221	1	0	1	1	10	0	3	0	6	0	1	0	9	1	1	0	4	3	0	6	0	0	6	0	0	13	20	0	0	4
OTU296	Euk	SAR	Str	Bi	un	Ha_Halocafeteria	KT210055	100	0.91	SAR	Str	Bi	un	Ha	Halocafeteria-seosinensis	2	0.2712	16	220	0	0	0	0	2	0	0	0	0	0	0	0	0	0	7	0	1	0	0	0	0	0	0	0	0	3	5	0	0	0
OTU274	Euk	SAR	Rhi	Ce	Th	Le_Lecythium	KP728379	100	0.94	SAR	Rhi	Ce	Th	Ch	Rhogostoma-minus	8	0.16587	44	218	33	0	1	0	2	0	2	2	6	6	5	5	1	0	4	0	1	1	2	0	7	0	1	0	0	5	7	0	7	5
OTU301	Euk	SAR	Str	Oo	Pe	Ph_Phytophthora	JN635228	100	0.91	SAR	Str	In			Incisomonas-marina	6	0.06947	28	218	0	0	0	0	1	0	0	0	3	0	2	0	0	0	0	0	0	4	1	0	0	0	4	0	2	3	0	0	4	0
OTU234	Euk	SAR	Rhi	Ce	Ce	Ce_Paracercomonas	FJ790727	100	0.94	SAR	Str	Ba	Co	Ch	Tenuicylindrus-belgicus	4	0.07295	25	215	3	13	44	3	0	0	0	0	0	0	0	0	1	0	24	0	0	0	15	0	2	2	0	0	0	0	0	0	2	0
OTU276	Euk	SAR	Str	Ba	Co	Th_Thalassiosira	HM991688	100	0.97	SAR	Str	Ba	Co	Rh	Urosolenia-eriensis	3	0.10371	23	214	0	0	0	0	0	6	0	18	0	7	1	7	0	3	0	39	0	0	0	1	0	2	16	0	4	0	0	6	0	0
OTU311	Euk	SAR	Str	Di	Pe	Ci_Ciliophrys	AB081641	100	1	SAR	Str	Di	Pe	Ci	Ciliophrys-infusionum	5	0.03236	17	211	0	0	0	0	0	0	0	0	0	0	0	0	0	0	0	0	0	0	0	0	0	0	0	0	0	0	9	0	0	0
OTU299	Euk	SAR	Alv	Di	To	To_Torodinium	KR139783	100	1	SAR	Alv	Di	To	To	Torodinium-robustum	2	0.01431	31	208	45	3	0	5	1	0	0	0	2	27	0	0	0	0	0	0	4	0	0	4	4	0	0	1	0	1	1	6	1	6
OTU316	Euk	SAR	Str	Ba	Co	Th_Roundia	KC284712	100	0.94	SAR	Str	Ba	Ba	Ba	Amphora-commutata	13	0.02444	32	207	0	1	0	0	9	0	0	0	0	0	2	9	2	7	2	0	6	0	0	0	0	0	0	0	3	7	5	0	2	0
OTU314	Euk	SAR	Str	Oi	Oi	_Oikomonas	U42454	100	0.91	SAR	Str	In			Incisomonas-marina	6	0.1349	27	206	0	0	0	0	0	0	6	0	2	0	0	0	0	0	0	0	1	0	7	1	6	0	0	0	0	4	0	0	1	0
OTU298	Euk	SAR	Str	Ch	Ch	Di_Dinobryon	EU024980	100	0.99	SAR	Str	Ch	Ch	Pa	Paraphysomonas-foraminifera	3	0.06863	26	203	0	0	0	0	7	1	6	0	4	0	7	0	0	0	10	0	2	0	0	0	8	0	0	27	0	0	1	0	8	9
OTU307	Euk	SAR	Rhi	Ce	Th	Le_Lecythium	KP728379	100	0.96	SAR	Rhi	Ce	Th	Ch	Rhogostoma-minus	12	0.14601	39	201	0	0	0	1	1	3	7	0	0	1	2	0	2	0	0	0	3	0	0	2	4	0	1	0	1	11	1	0	1	0
OTU305	Euk	SAR	Str	Bi	un	Ha_Halocafeteria	KT210055	100	0.91	SAR	Str	Ba	Ba	Ba	Amphipleuraceae-sp	3	0.25131	25	200	0	0	0	0	0	0	0	0	0	0	0	0	0	0	2	0	5	7	0	0	10	0	6	0	3	32	0	0	0	0
OTU147	Euk	SAR	Alv	Ci	In	Sp_Hemigastrostyla	KU594640	100	0.97	SAR	Alv	Ci	In	Sp	Hemigastrostyla-enigmatica	3	0.04744	5	198	0	0	0	0	0	0	0	0	0	0	0	0	0	0	0	0	0	0	0	0	0	0	0	0	0	0	0	0	0	0
OTU303	Euk	SAR	Rhi	Ce		_Cercozoan	DQ666485	100	0.89	SAR	Rhi	Ac	Ar	Sp	Hexaconus-serratus	4	0.12154	12	196	0	0	25	0	1	2	2	2	0	0	0	0	0	0	0	0	9	0	0	1	8	0	0	0	6	14	0	0	0	0
OTU300	Euk	SAR	Rhi	Ce	Th	Le_Lecythium	KP728379	100	0.98	SAR	Rhi	Ce	Th		Mataza-hastifera	7	0.05484	31	191	0	0	0	13	1	0	1	0	0	0	2	0	10	0	0	0	2	0	0	1	3	0	36	0	0	3	4	0	1	0
OTU398	Euk	SAR	Str	Bi	Ad	_Adriamonas	AF243501	100	0.98	SAR	Str	Bi	Ne		Nerada-mexicana	4	0.02222	7	189	125	0	0	0	0	0	0	1	0	1	0	0	0	0	0	0	0	0	0	0	0	0	0	0	1	0	0	0	0	0
OTU308	Euk	SAR	Rhi	Ce	Va	Va_Vampyrella	HE609041	100	0.88	SAR	Rhi	Ce	Va	Va	Penardia-sp	6	0.29999	2	186	0	0	0	0	0	0	0	0	0	0	0	0	0	0	0	0	0	0	0	0	0	0	0	0	0	0	0	0	0	0
OTU294	Euk	SAR	Str	Ba	Co	Rh_Guinardia	KC309536	100	0.95	SAR	Str	Ba	Co	Rh	Guinardia-delicatula	3	0.16379	34	184	0	0	1	0	0	10	1	13	0	1	0	5	0	6	1	8	0	0	7	6	3	8	0	7	6	0	0	0	0	9
OTU302	Euk	SAR	Str	Di	Pe	Ap_Apedinella	HQ710559	100	0.96	SAR	Str	Di	Rh	Rh	Rhizochromulina-cf	13	0.12858	48	182	0	0	1	0	3	13	0	24	4	7	2	5	0	2	1	5	2	0	1	6	0	2	1	5	3	0	7	1	3	7
OTU323	Euk	SAR	Str	Ba	Co	Co_Actinocyclus	AY485506	100	0.98	SAR	Str	Ba	Co	Co	Actinocyclus-actinochilus	2	0.04377	21	182	0	0	2	0	0	3	0	0	0	6	0	0	0	13	0	0	0	0	2	10	0	6	0	0	0	0	0	2	0	2
OTU330	Euk	SAR	Rhi	Ce	Im	Si_Trachelocorythion	AJ418789	100	0.96	SAR	Rhi	Ce	Im	Si	Euglypha-filifera	3	0.06065	7	177	0	72	0	0	2	0	0	0	0	0	0	0	0	0	0	0	0	0	0	0	0	89	0	0	0	0	0	0	0	0
OTU328	Euk	SAR	Rhi	Ce	Pl	Pl_Phagomyxa	AF310903	100	0.99	SAR	Rhi	Ce	Pl	Pl	Woronina-pythii	2	0.00999	4	177	0	0	0	0	0	0	0	0	0	0	0	0	0	0	0	0	0	0	1	0	0	0	0	0	0	0	27	0	0	0
OTU387	Euk	SAR	Alv	Ch	Ch	_Chromera	JN986789	100	0.96	SAR	Alv	Ch	Ch		Chromera-velia	3	0.07834	10	175	0	10	0	0	0	0	0	0	0	0	0	0	0	0	0	0	0	0	0	0	0	0	0	33	0	0	0	6	0	99
OTU309	Euk	SAR	Str	Oo	Ol	Ol_Olpidiopsis	KM210530	100	0.99	SAR	Str	Sc			Schizocladia-ischiensis	5	0.05661	25	174	0	0	0	0	0	0	0	0	0	0	2	0	3	0	0	0	0	12	0	0	8	0	9	2	0	18	0	0	0	0
OTU337	Euk	SAR	Alv	Di	Pe	He_Heterocapsa	KF925338	100	0.99	SAR	Alv	Di	Pe	Am	Herdmania-litoralis	2	0.05817	32	173	0	0	1	0	2	0	0	0	1	0	0	0	0	0	1	0	0	13	1	0	2	0	12	3	2	28	0	0	0	0
OTU327	Euk	SAR	Rhi	Ce	Im	Si_Thaumatomonas	DQ211592	100	0.89	SAR	Rhi	Ce	Im	Si	Cyphoderia-major	13	0.25292	21	172	0	0	0	29	1	1	0	0	0	20	0	0	7	0	5	0	2	0	19	1	0	0	0	0	0	1	0	0	6	0
OTU317	Euk	SAR	Str	In		_Incisomonas	JN848814	100	0.98	SAR	Str	In			Incisomonas-marina	4	0.00344	6	172	0	51	0	0	0	0	0	0	0	0	0	0	0	0	0	0	0	0	0	0	0	0	0	0	0	0	0	0	0	49
OTU379	Euk	SAR	Alv	Ci	In	Sp_Holosticha	DQ059583	100	0.99	SAR	Alv	Ci	In	Sp	Holosticha-diademata	3	0.0007	2	171	0	0	0	155	0	0	0	0	0	0	0	0	0	0	0	0	0	0	0	0	0	0	0	0	0	0	0	0	0	0
OTU312	Euk	SAR	Alv	Ci	In	Sp_Laboea	AF399154	100	0.97	SAR	Alv	Ci	In	Sp	Laboea-strobila	5	0.09598	33	170	0	0	0	0	0	0	0	0	0	0	0	1	0	0	0	0	10	3	1	4	4	1	23	6	10	32	1	0	0	0
OTU282	Euk	SAR	Rhi	Ce	Im	Si_Sphenoderia	KF539409	100	0.94	SAR	Rhi	Ce	Im	Ma	Pseudopirsonia-mucosa	5	0.08279	31	169	0	1	0	0	1	20	0	2	2	3	0	0	0	12	1	0	0	0	0	5	18	0	2	1	0	1	0	2	0	0
OTU346	Euk	SAR	Rhi	Ac	Ar	Sp_Dorataspis	JN811166	100	0.93	SAR	Rhi	Ac	Ar	Sp	Hexaconus-serratus	4	0.14644	13	169	0	0	0	40	0	0	0	0	0	0	8	0	0	0	0	0	0	38	0	0	0	0	1	0	0	8	3	1	0	0
OTU318	Euk	SAR	Alv	Ci	In	Pr_Pelagothrix	AB486009	100	0.97	SAR	Alv	Ci	In	Pr	Prorodon-viridis	12	0.06742	29	166	0	0	0	0	0	0	0	0	0	0	1	0	0	0	0	0	2	34	1	1	8	0	10	3	7	22	2	0	0	0
OTU329	Euk	SAR	Alv	Ci	In	Sp_Strombidium	KJ737432	100	0.96	SAR	Alv	Ci	In	Sp	Strombidium-capitatum	17	0.11383	27	165	0	0	0	0	0	0	0	1	0	0	0	0	0	0	0	0	6	9	3	0	0	1	13	1	8	12	0	0	0	0
OTU226	Euk	SAR	Alv	Ci	In	Li_Paraspathidium	FJ875140	100	0.94	SAR	Alv	Ci	un	Cr	Cryptocaryon-irritans	2	0.09031	4	159	0	0	0	0	0	0	0	0	0	0	0	0	0	0	11	0	0	0	0	0	0	0	0	0	0	0	0	0	0	0
OTU290	Euk	SAR	Rhi	Ce	Im	Si_Thaumatomastix	GQ144681	100	0.97	SAR	Rhi	Ce	Th		Mataza-hastifera	8	0.03573	34	158	3	0	7	0	8	0	0	0	0	2	5	24	2	2	0	0	0	0	0	4	3	0	0	0	1	1	0	0	0	0
OTU325	Euk	SAR	Alv	Di	Gy	To_Katodinium	KP790161	100	1	SAR	Alv	Di	Gy	Ka	Karenia-bidigitata	4	0.0068	29	157	0	0	0	0	2	1	0	0	3	0	0	4	6	0	0	24	6	2	0	0	2	0	1	0	0	2	13	0	1	1
OTU403	Euk	SAR	Rhi	Ce	Im	Si_Sphenoderia	KF539409	100	0.98	SAR	Rhi	Ce	Im	Ma	Pseudopirsonia-mucosa	9	0.08404	16	157	10	0	0	0	0	0	8	0	0	0	0	0	0	0	0	0	0	0	0	0	11	0	0	0	0	0	2	0	0	0
OTU278	Euk	SAR	Alv	Ci	In	Li_Cyclotrichium	FJ876971	100	0.98	SAR	Alv	Ci	In	Li	Cyclotrichium-cyclokaryon	3	0.05459	6	155	84	0	0	4	0	0	0	0	0	0	0	0	0	0	0	0	0	0	0	0	0	0	0	0	0	0	0	0	0	0
OTU422	Euk	SAR	Alv	Di	Pe	Gl_Peridiniopsis	HM596542	100	0.82	SAR	Rhi	Ce	Ch	Lo	Lotharella-vacuolata	4	0.45024	24	154	0	0	0	0	15	3	0	0	0	8	8	0	0	0	3	0	0	0	0	0	0	0	6	2	3	0	0	3	7	3
OTU396	Euk	SAR	Alv	Ci	In	Sp_Prodiscocephalus	DQ646880	100	0.93	SAR	Alv	Ci	In	Sp	Paradiscocephalus-elongatus	2	0.13138	3	153	4	0	129	0	0	0	0	0	0	0	0	0	0	0	0	0	0	0	0	0	0	0	0	0	0	0	0	0	0	0
OTU321	Euk	SAR	Alv	Ci	In	Sp_Strombidium	KP260513	100	0.96	SAR	Alv	Ci	In	Sp	Strombidium-caudispina	7	0.11919	35	150	0	0	0	1	0	15	4	21	1	0	2	2	0	4	0	4	1	0	13	1	0	0	2	13	1	0	0	4	2	9
OTU324	Euk	SAR	Alv	Ci	In	Ol_Mesanophrys	JN885085	100	1	SAR	Alv	Ci	In	Ol	Mesanophrys-carcini	3	0.03452	27	150	0	0	0	0	4	4	0	0	2	0	10	0	0	0	0	0	0	0	0	0	3	0	3	0	3	1	2	0	1	1
OTU354	Euk	SAR	Alv	Di	Gy	Gy_Gyrodinium	AB120004	100	0.99	SAR	Alv	Di	Gy	Gy	Gyrodinium-rubrum	6	0.0196	16	150	1	0	0	0	5	9	0	29	0	0	0	9	0	0	0	0	1	0	0	0	0	0	0	0	5	0	0	0	0	0
OTU272	Euk	SAR	Alv	Ci	In	Co_Colpoda	KJ873047	100	0.96	SAR	Alv	Ci	In	Co	Pseudocyrtolophosis-alpestris	3	0.04668	15	150	0	0	0	0	0	0	0	0	1	16	0	0	0	0	0	21	4	0	0	0	10	0	0	0	0	1	0	0	0	0
OTU373	Euk	SAR	Alv	Ci	In	Pr_Plagiopogon	KC771342	100	0.96	SAR	Alv	Ci	In	Na	Discotricha-papillifera	7	0.20287	8	150	0	0	0	0	0	0	0	0	0	0	10	0	0	0	0	0	0	0	0	0	0	0	0	0	0	10	0	0	0	0
OTU417	Euk	SAR	Rhi	Ce	Im	Si_Protaspis	FJ824125	100	0.99	SAR	Rhi	Ce	Th	Cr	Cryothecomonas-aestivalis	6	0.0129	29	149	0	0	6	7	8	1	4	0	3	0	10	0	0	0	2	0	9	0	0	0	0	0	0	0	1	8	1	6	0	0
OTU319	Euk	SAR	Str	Ba	Fr	Fr_Ulnaria	KF959659	100	0.99	SAR	Str	Ba	Fr	Fr	Grammonema-sp	4	0.03871	26	146	0	1	1	0	0	1	0	2	0	13	0	0	0	2	0	0	0	0	0	4	0	3	0	3	2	0	0	0	0	10
OTU338	Euk	SAR	Rhi	Ce		_Auranticordis	EU484394	100	0.86	SAR	Str	Pe	Sa	Sa	Chrysoreinhardia-sp	3	0.16131	9	145	0	0	1	0	0	0	0	0	2	0	0	0	0	0	0	0	2	0	0	0	0	0	0	0	0	0	1	1	0	0
OTU363	Euk	SAR	Str	Ba	Me	Bi_Hemiaulus	KC309496	100	0.97	SAR	Str	Ba	Co	Th	Thalassiosira-mala	27	0.09365	19	144	0	0	4	0	0	0	0	1	1	0	0	0	0	0	0	0	0	0	0	0	0	5	0	4	5	0	0	7	0	2
OTU384	Euk	SAR	Alv	Ci	In	Ol_Cohnilembus	HM236339	100	0.96	SAR	Alv	Ci	In	Ol	Pseudoplatynematum-denticulatum	2	0.06162	11	142	0	0	0	0	3	0	22	0	0	0	2	0	0	0	0	0	7	0	0	0	0	0	0	0	0	0	0	0	0	0
OTU156	Euk	SAR	Rhi	Ce	Im	Si_Protaspis	FJ824125	100	0.99	SAR	Rhi	Ce	Im	Si	Protaspis-sp	12	0.02392	13	140	0	0	27	0	0	0	0	0	0	0	0	0	0	3	0	0	0	0	0	1	0	0	0	0	8	0	0	1	0	0
OTU333	Euk	SAR	Rhi	Ce	Ce	un_Nucleocercomonas	HM536166	100	0.92	SAR	Alv	Co	Co		Colponema-vietnamica	4	0.13663	21	139	0	0	0	17	0	0	2	0	0	0	0	0	0	2	0	0	0	0	0	0	0	0	0	0	0	0	1	9	3	0
OTU377	Euk	SAR	Str	Ch	Ch	Ch_Cyclonexis	AF123292	100	0.96	SAR	Str	Ch	Ch	Ch	Chrysosaccus-sp	3	0.03021	10	138	18	53	0	0	0	0	0	0	0	0	1	0	1	0	0	0	0	0	0	0	0	0	0	0	0	0	0	0	0	0
OTU362	Euk	SAR	Str	Di	Pe	Pt_Pteridomonas	AB081640	100	0.88	SAR	Str	Di	Rh	Rh	Rhizochromulina-cf	3	0.23878	34	137	0	0	0	0	5	0	4	0	8	1	3	1	8	2	3	0	1	0	0	0	4	0	0	0	0	0	7	0	1	0
OTU351	Euk	SAR	Alv	Ci	In	Sp_Helicostomella	AB640639	100	0.96	SAR	Alv	Ci	In	Sp	Parundella-sp	3	0.1163	25	137	0	0	2	0	0	4	0	12	0	0	0	5	0	8	0	1	0	0	7	9	0	2	0	19	4	0	0	11	0	5
OTU348	Euk	SAR	Alv	Ci	In	Li_Lacrymariidae	LN869967	100	0.98	SAR	Alv	Ci	In	Li	Lacrymariidae-sp	4	0.03669	4	136	48	0	0	0	0	0	0	0	0	0	0	0	0	0	9	73	0	6	0	0	0	0	0	0	0	0	0	0	0	0
OTU364	Euk	SAR	Alv	Di	Go	Go_Amylax	JX666361	100	1	SAR	Alv	Di	Go	Go	Amylax-triacantha	2	0.0606	11	135	0	0	12	0	0	0	0	0	0	4	0	16	0	3	0	0	0	0	67	0	0	0	0	0	1	0	0	9	0	0
OTU339	Euk	SAR	Alv	Di	Di	Di_Dinophysis	HM853815	100	1	SAR	Alv	Di	Di	Di	Dinophysis-caudata	2	0.00775	15	134	0	0	0	0	0	0	0	0	0	8	0	0	0	0	0	0	0	0	0	1	0	0	0	0	8	0	0	11	0	0
OTU365	Euk	SAR	Str	Ba	Co	Co_Corethron	KC309526	100	0.94	SAR	Str	Ba	Co	Co	Corethron-hystrix	2	0.08668	5	134	0	0	0	0	0	0	0	0	0	0	0	0	0	27	0	0	0	0	0	0	0	0	0	0	0	0	0	0	0	0
OTU394	Euk	SAR	Rhi	Ce	Im	Si_Sphenoderia	KF539409	100	0.99	SAR	Rhi	Ce			Cercozoa-sp	3	0.03751	6	130	0	0	0	0	9	0	0	0	0	0	0	0	0	0	0	0	0	0	0	0	0	0	0	0	0	0	0	0	0	0
OTU371	Euk	SAR	Rhi	Ce	Im	Si_Euglypha	EF456755	100	0.94	SAR	Rhi	Ce	Ce	Ce	Massisteria-sp	8	0.17168	29	129	0	0	0	0	1	0	0	0	0	0	2	9	0	0	0	0	0	0	0	2	12	2	0	7	11	0	1	2	1	0
OTU357	Euk	SAR	Str	La	Th	Ap_Aplanochytrium	AJ519935	100	1	SAR	Str	La	La	La	Labyrinthula-sp	4	0.21201	20	128	0	0	0	0	0	0	0	0	0	1	0	11	0	0	0	1	0	0	0	4	0	0	0	0	0	3	0	0	0	0
OTU395	Euk	SAR	Str	Di	Pe	Ps_Pseudopedinella	HQ710560	100	0.98	SAR	Str	Di	Rh	Rh	Rhizochromulina-cf	12	0.06429	36	127	0	0	0	0	9	0	0	5	4	1	4	0	5	0	2	0	0	2	1	0	5	0	0	0	0	0	3	0	9	1
OTU388	Euk	SAR	Rhi	Ce		_Cercozoan	DQ666485	100	0.89	SAR	Rhi	Ac	Sy	Am	Amphibelone-cultellata	3	0.18394	12	127	0	0	1	0	0	9	15	0	0	0	0	0	1	0	0	0	29	0	0	1	0	0	0	16	0	0	4	0	0	0
OTU353	Euk	SAR	Alv	Ci	In	Ol_Cohnilembus	HM236339	100	0.98	SAR	Alv	Ci	In	Ol	Cohnilembus-verminus	3	0.06211	1	127	0	0	0	0	0	0	0	0	0	0	0	0	0	0	0	0	0	0	0	0	0	0	0	0	0	0	0	0	0	0
OTU400	Euk	SAR	Str	Oo	Ol	Ol_Olpidiopsis	KM210530	100	0.93	SAR	Str	In			Incisomonas-marina	5	0.08985	17	125	0	0	0	0	2	5	0	0	0	0	0	0	0	0	0	0	1	0	0	0	0	2	0	0	0	0	6	0	0	1
OTU551	Euk	SAR	Str	Oo	Ol	Ol_Olpidiopsis	AB363063	100	0.96	SAR	Str	Ba	Fr	Fr	Licmophora-grandis	21	0.09569	44	124	0	1	0	1	3	8	0	1	1	4	0	2	0	4	1	3	0	0	1	2	0	1	0	0	1	0	3	2	0	8
OTU360	Euk	SAR	Alv	Ci	In	Sp_Strombidium	FJ480419	100	0.99	SAR	Alv	Ci	In	Sp	Strombidium-basimorphum	5	0.04269	22	124	0	0	0	0	0	0	0	0	0	0	0	0	1	0	0	1	3	0	3	0	1	0	4	0	0	5	0	0	0	0
OTU420	Euk	SAR	Rhi	Ac	Ar	Sp_Dorataspis	JN811166	100	0.93	SAR	Rhi	Ac	Ar	Sp	Hexaconus-serratus	3	0.12323	2	123	0	0	0	0	0	0	0	0	0	0	0	0	115	0	0	0	0	0	0	0	0	0	0	0	0	0	0	0	0	0
OTU483	Euk	SAR	Rhi	Ce	Th	Le_Lecythium	KP728379	100	0.94	SAR	Rhi	Ce	Th	Ch	Rhogostoma-minus	7	0.18692	20	122	0	0	0	22	0	0	0	0	0	0	6	0	0	0	0	0	2	1	0	4	14	0	0	0	0	0	0	0	17	0
OTU391	Euk	SAR	Str	Ba	Co	Ch_Leptocylindrus	KC309538	100	0.98	SAR	Str	Ba	Co	Ch	Leptocylindrus-danicus	4	0.09084	24	121	0	0	0	0	0	0	0	0	0	0	2	0	0	0	0	1	4	8	0	1	3	0	10	1	0	20	0	0	0	0
OTU370	Euk	SAR	Rhi	Ce	Th	Tr_Trachyrhizium	LC125926	100	0.94	SAR	Str	Ph	Ph	Ph	Stichogloea-doederleinii	2	0.1066	22	121	4	7	0	0	21	0	0	1	3	3	0	0	0	1	3	2	0	0	1	14	0	0	0	0	2	0	0	4	0	0
OTU368	Euk	SAR	Str	La	Th	Ap_Aplanochytrium	KT901795	100	0.97	SAR	Str	Ba	Ba	Ba	Entomoneis-sp	3	0.06162	21	121	1	0	0	0	8	0	20	0	4	0	0	0	2	0	5	0	0	0	0	0	2	0	0	0	0	3	1	0	3	0
OTU342	Euk	SAR	Alv	Ci	In	Na_Trochiliopsis	JQ918367	100	0.87	SAR	Str	Oo	Rh	Rh	Sapromyces-elongatus	2	0.14609	21	121	3	14	5	19	0	2	1	1	0	39	0	0	0	0	0	0	0	0	0	0	0	0	0	0	0	1	1	1	0	0
OTU406	Euk	SAR	Str	Sy	Sy	Ma_Synura	KM590614	100	0.99	SAR	Str	Ch	Ch	Di	Dinobryon-faculiferum	2	0.01338	23	119	0	0	0	0	1	0	0	0	3	0	0	0	3	0	3	0	5	0	0	2	0	0	3	0	0	2	1	8	5	0
OTU392	Euk	SAR	Rhi	Ce	Im	Si_Ovulinata	HQ121432	100	0.99	SAR	Rhi	Ce	Im	Si	Ovulinata-parva	4	0.02254	17	114	0	0	0	0	0	4	0	1	0	3	0	0	0	0	0	0	0	0	0	1	0	0	0	0	1	0	1	5	0	0
OTU397	Euk	SAR	Alv	Ci	In	Sp_Eutintinnus	AF399169	100	0.87	SAR	Alv	Ci	In	Sp	Parastrombidinopsis-shimi	4	0.22908	14	113	9	0	0	0	4	0	11	7	5	0	0	7	0	0	0	3	11	0	0	12	0	0	0	13	22	2	0	0	0	0
OTU322	Euk	SAR	Rhi	Ce	Th	Tr_Trachyrhizium	LC125926	100	1	SAR	Rhi	Ce	Th	Tr	Trachyrhizium-urniformis	11	0.03986	7	112	0	0	0	0	0	0	0	0	0	0	0	0	0	0	0	0	0	0	0	0	0	0	0	0	0	0	0	0	0	0
OTU572	Euk	SAR	Str	Ba	Ba	Ba_Epithemia	HQ912409	100	0.99	SAR	Str	Ba	Co	Ch	Chaetoceros-muellerii	8	0.12167	24	111	0	0	0	0	0	0	0	0	0	0	0	0	0	0	0	0	1	7	2	0	6	0	5	2	3	25	0	0	0	0
OTU281	Euk	SAR	Rhi	Ce	Im	Si_Thaumatomonas	DQ211592	100	0.9	SAR	Rhi	Ce	Im	Si	Cyphoderia-major	12	0.22202	30	110	0	0	1	0	6	4	1	0	2	0	0	0	0	3	2	0	2	0	1	0	0	0	0	0	0	4	1	1	3	2
OTU347	Euk	SAR	Alv	Ci	In	Pr_Plagiocampa	KC832950	100	1	SAR	Alv	Ci	un	Cr	Cryptocaryon-irritans	3	0.00177	3	108	0	25	0	0	0	0	0	0	0	0	0	0	0	0	0	0	16	0	0	0	67	0	0	0	0	0	0	0	0	0
OTU425	Euk	SAR	Rhi	Ce	Pl	Pl_Spongospora	AF245217	100	0.94	SAR	Rhi	Ce	Pl	Pl	Spongospora-subterranea	8	0.19782	1	108	0	0	0	0	0	0	0	0	0	0	0	0	0	0	0	0	0	0	0	0	0	0	0	0	0	0	0	0	0	0
OTU591	Euk	SAR	Alv	Co	Co	_Colponema	KJ598081	100	0.97	SAR	Str	Ca			Cantina-marsupialis	7	0.11297	41	106	0	2	2	0	2	0	2	0	2	0	1	0	0	0	3	0	2	3	2	0	6	0	1	1	1	4	4	0	1	0
OTU385	Euk	SAR	Rhi	Ce	Im	Si_Assulina	EF456749	100	0.89	SAR	Rhi	Ce			Auranticordis-quadriverberis	10	0.18177	20	106	0	2	0	0	3	0	0	0	0	0	0	0	5	0	0	0	0	0	0	0	0	0	0	0	0	3	2	0	0	0
OTU366	Euk	SAR	Str	Ba	Co	Co_Melosira	KF915810	100	0.99	SAR	Str	Ba	Co	Co	Melosira-dubia	2	0.02431	17	106	0	0	6	0	0	0	0	5	0	0	0	0	0	1	0	18	0	0	0	1	0	0	0	0	0	0	0	4	0	0
OTU265	Euk	SAR	Str	Ba	Fr	Fr_Licmophora	AB430601	100	0.89	SAR	Str	La	Th	Sc	Schizochytrium-minutum	3	0.21149	23	103	0	0	7	0	0	0	0	2	9	3	2	0	3	0	0	0	9	0	0	0	0	0	0	0	1	2	0	0	1	0
OTU426	Euk	SAR	Str	Ba	Ba	Ba_Epithemia	HQ912409	100	0.99	SAR	Str	Ba	Co	Ch	Chaetoceros-radicans	4	0.11192	20	101	1	0	0	0	0	0	0	0	6	0	1	0	0	0	0	0	0	11	0	0	4	0	7	0	0	22	1	0	3	0
OTU390	Euk	SAR	Alv	Ci	un	_Ciliate	AM412525	100	0.96	SAR	Alv	Ci	un		Ciliate-sp	5	0.07007	14	101	0	0	0	0	4	0	0	0	0	0	9	0	0	0	0	0	0	0	0	0	2	0	0	0	0	0	9	0	0	0
OTU452	Euk	SAR	Str	Ba	Co	Th_Thalassiosira	KU352756	100	0.96	SAR	Str	Ba	Co	Th	Thalassiosira-mala	25	0.09369	1	99	0	0	0	0	0	0	99	0	0	0	0	0	0	0	0	0	0	0	0	0	0	0	0	0	0	0	0	0	0	0
OTU435	Euk	SAR	Str	Oo	Pe	Ph_Phytophthora	JN635082	100	0.89	SAR	Str	Bi	Ca		Caecitellus-paraparvulus	3	0.24485	23	97	0	0	0	1	7	0	0	0	1	0	3	0	0	2	0	0	15	1	0	0	5	0	4	0	0	8	3	0	0	0
OTU428	Euk	SAR	Rhi	Ce	Im	Si_Ovulinata	HQ121432	100	0.81	SAR	Rhi	Ce	Im	Si	Allas-diplophysa	3	0.59423	13	97	0	18	0	0	0	0	2	0	12	0	0	0	0	0	0	0	0	0	0	0	0	0	0	0	0	6	0	24	0	0
OTU468	Euk	SAR	Rhi	Ce	Pl	Pl_Phagomyxa	AF310903	100	0.97	SAR	Rhi	Ce	Pl	Pl	Spongospora-subterranea	7	0.0947	2	96	0	0	0	92	4	0	0	0	0	0	0	0	0	0	0	0	0	0	0	0	0	0	0	0	0	0	0	0	0	0
OTU441	Euk	SAR	Alv	Ci	In	Li_Pseudoholophrya	KT246085	100	0.94	SAR	Alv	Ci	In	Li	Entodinium-nanellum	2	0.29072	1	96	0	0	0	0	0	0	0	0	0	96	0	0	0	0	0	0	0	0	0	0	0	0	0	0	0	0	0	0	0	0
OTU467	Euk	SAR	Rhi	Ce	Im	Si_Protaspis	FJ824125	100	0.98	SAR	Rhi	Ce	Th	Ch	Rhogostoma-minus	11	0.12556	21	95	0	0	0	0	0	0	0	0	0	0	0	0	0	1	0	2	0	5	3	0	6	0	1	0	2	13	0	0	0	0
OTU407	Euk	SAR	Alv	Ci	In	Sp_Helicostomella	AB640639	100	0.99	SAR	Alv	Ci	In	Sp	Parundella-sp	4	0.05444	26	94	0	2	2	0	1	0	0	10	0	0	0	3	0	2	0	3	0	0	1	4	0	5	0	16	2	0	0	1	0	1
OTU534	Euk	SAR	Str	La	Th	Ap_Aplanochytrium	KT901795	100	0.96	SAR	Str	Bl			Blastocystis-cycluri	3	0.32732	21	93	0	0	0	0	4	0	0	18	0	0	0	0	0	4	0	3	1	0	0	0	2	2	0	7	3	0	3	0	0	0
OTU529	Euk	SAR	Alv	Ci	In	Ol_Homalogastra	EF158848	100	0.91	SAR	Alv	Ci	In	Ol	Parauronema-virginianum	3	0.30666	9	93	0	0	0	0	0	0	0	7	0	14	4	0	0	0	0	0	10	0	0	0	0	0	0	0	0	10	0	0	40	0
OTU402	Euk	SAR	Rhi	Ce	Th	Tr_Trachyrhizium	LC125926	100	0.94	SAR	Rhi	Ce	Th	Tr	Trachyrhizium-urniformis	10	0.12203	22	92	0	0	0	0	1	1	8	0	1	0	6	0	0	0	0	0	0	0	0	0	6	10	0	0	0	0	1	0	2	0
OTU320	292r									SAR	Str	Ba	un		Bacillariophyta-sp	14	0.00075	17	92	0	0	0	0	0	4	0	6	0	0	0	0	0	1	0	0	0	0	0	0	0	0	0	0	0	0	0	4	0	0
OTU326	Euk	SAR	Alv	Ci	In	Ol_Philasterides	FJ848877	100	0.96	SAR	Alv	Ci	In	Ol	Philasterides-armatalis	2	0.05752	4	92	0	0	0	0	0	0	0	0	0	0	0	0	0	0	0	0	0	0	0	0	0	0	0	83	0	0	0	0	0	0
OTU358	Euk	SAR	Alv	Ci	In	Sp_Holosticha	DQ059583	100	0.98	SAR	Alv	Ci	In	Sp	Holosticha-diademata	5	0.02062	3	92	0	0	0	0	10	0	0	0	0	0	0	0	0	0	0	0	0	0	0	0	0	0	0	0	0	0	0	0	0	0
OTU455	Euk	SAR	Alv	Ap		_Apicomplexa	AF238264	100	0.89	SAR	Alv	Di	Ph	Ph	Phytodinium-sp	4	0.23822	2	92	0	0	0	0	0	0	0	0	0	0	0	0	0	0	0	0	0	0	7	0	0	0	0	0	0	0	0	0	0	0
OTU419	Euk	SAR	Str	Ch	Ch	Ch_Chrysowaernella	HQ710556	100	0.94	SAR	Str	Ba	Fr	Fr	Licmophora-grandis	16	0.16179	30	90	0	0	0	0	0	5	1	4	0	4	0	0	0	5	1	0	0	1	3	2	0	3	0	5	0	0	0	1	0	2
OTU285	Euk	SAR	Str	De		_cf	JX272636	100	0.98	SAR	Str	De			cf-Developayella	4	0.06944	19	90	0	0	0	0	0	0	0	0	6	0	1	4	0	2	0	0	0	0	0	0	0	0	0	0	1	0	2	0	0	0
OTU432	Euk	SAR	Str	Ba	Co	Th_Thalassiosira	HM991688	100	0.96	SAR	Str	Ba	Co	Th	Thalassiosira-mala	22	0.11666	3	90	0	0	0	0	0	4	0	0	0	3	0	0	0	0	0	0	0	0	0	0	0	0	0	0	0	0	0	0	0	0
OTU456	Euk	SAR	Str	Ba	Ba	Ba_Halamphora	AB754832	100	0.94	SAR	Str	Ba	Me	Bi	Talaroneis-posidoniae	3	0.15484	32	89	0	0	0	0	1	0	3	0	1	0	4	0	0	1	3	0	2	2	0	0	4	0	3	0	0	3	1	0	0	0
OTU334	Euk	SAR	Alv	Ci	In	Sp_Omegastrombidium	EF486862	100	0.88	SAR	Alv	Ci	In	Sp	Parastrombidinopsis-shimi	6	0.17718	17	89	23	0	17	8	0	3	0	2	0	0	2	0	0	0	0	0	3	0	0	2	0	0	0	0	0	2	0	0	0	0
OTU449	Euk	SAR	Alv	Ci	In	Sp_Choreotrichia	LN870020	100	0.99	SAR	Alv	Ci	In	Sp	Choreotrichia-sp	2	0.01462	25	88	0	0	0	8	8	0	1	0	0	0	11	1	0	0	0	0	2	0	0	0	0	0	2	0	1	1	0	0	0	0
OTU415	Euk	SAR	Alv	Di	Pe	Ox_Thecadinium	GU295204	100	0.8	SAR	Alv	Ap			Apicomplexa-sp	3	0.45614	1	88	0	0	0	0	0	0	0	0	0	0	0	0	0	0	0	0	0	0	88	0	0	0	0	0	0	0	0	0	0	0
OTU414	Euk	SAR	Str	Ba	Co	Th_Thalassiosira	KU352756	100	0.95	SAR	Str	Ba	Co	Th	Thalassiosira-mala	17	0.16286	9	87	0	0	0	0	0	0	0	0	0	0	0	0	0	0	0	0	0	0	0	6	0	0	0	0	13	0	0	0	0	0
OTU458	Euk	SAR	Alv	Ci	In	Sp_Strombidium	JF791016	100	0.96	SAR	Alv	Ci	In	Sp	Strombidium-cf	3	0.10591	23	86	0	5	0	0	0	1	2	21	0	0	0	0	0	2	0	0	0	1	3	4	0	0	1	10	0	0	0	3	1	13
OTU212	Euk	SAR	Str	Ba	Co	Co_Actinoptychus	HQ912574	100	1	SAR	Str	Ba	Co	Co	Actinoptychus-sp	3	0.02886	21	86	0	0	13	0	0	8	0	8	0	2	0	2	0	3	0	5	0	0	0	0	0	9	0	0	2	0	0	2	0	0
OTU399	Euk	SAR	Alv	Co	Co	_Colpodella	AF330214	100	0.96	SAR	Alv	Co	Co		Colpodella-tetrahymenae	3	0.02964	13	86	0	0	5	3	0	0	0	0	0	0	0	0	0	0	0	0	4	0	0	0	8	0	0	0	0	0	2	0	20	0
OTU436	Euk	SAR	Rhi	Ce	Im	Si_Sphenoderia	KF539409	100	0.96	SAR	Rhi	Ce	Im	Si	Sphenoderia-lenta	3	0.02435	13	86	0	0	0	0	1	0	0	0	0	0	0	0	0	0	0	0	0	0	0	0	0	0	6	0	0	0	0	3	0	0
OTU401	Euk	SAR	Str	Oo	Sa	Sa_Aquastella	KF294791	100	0.9	SAR	Str	Ba	Ba	Ba	Cocconeis-sp	2	0.21039	4	86	2	0	12	0	0	0	0	0	0	0	0	0	0	0	0	0	0	0	0	0	0	0	0	0	0	0	0	0	0	0
OTU463	Euk	SAR	Alv	Di	un	Ab_Abedinium	GU355679	100	0.92	SAR	Alv	Di	Gy	Gy	Testudodinium-sp	2	0.53702	6	85	0	0	0	0	0	0	0	0	0	0	0	0	0	0	0	0	0	0	0	0	0	2	0	0	0	0	0	0	0	0
OTU536	Euk	SAR	Alv	Ci	In	Pr_Pelagothrix	AB486009	100	0.96	SAR	Alv	Ci	In	Na	Discotricha-papillifera	6	0.22879	1	85	0	0	0	85	0	0	0	0	0	0	0	0	0	0	0	0	0	0	0	0	0	0	0	0	0	0	0	0	0	0
OTU540	Euk	SAR	Alv	Ci	Po	He_Peritromus	AJ537427	100	1	SAR	Alv	Ci	Po	He	Peritromus-kahli	2	0.00127	1	85	0	0	0	0	0	0	0	0	0	0	0	0	0	0	0	0	0	0	0	0	0	0	0	0	0	0	0	0	0	0
OTU469	Euk	SAR	Alv	Ci	In	Li_Askenasia	EU024989	100	0.96	SAR	Alv	Ci	In	Ol	Cyclidium-porcatum	4	0.09005	24	84	0	0	0	0	0	0	1	0	0	0	0	0	0	0	1	0	7	10	4	0	2	0	6	3	0	13	0	0	0	0
OTU515	Euk	SAR	Str	Oo	Sa	Sa_Leptolegnia	AJ238662	100	0.99	SAR	Str	Oo	Sa	Sa	Leptolegnia-sp	4	0.00854	14	83	0	0	0	5	0	0	0	0	0	0	0	0	0	0	0	12	0	0	0	0	0	1	0	0	0	1	2	0	2	0
OTU393	Euk	SAR	Alv	Ci	In	Li_Pseudoholophrya	KT246085	100	0.95	SAR	Alv	Ci	In	Li	Apobryophyllum-schmidingeri	3	0.14328	1	83	0	0	0	0	0	0	0	0	0	0	0	0	0	0	0	0	0	0	0	0	0	0	0	0	0	0	0	0	0	0
OTU532	Euk	SAR	Alv	Ci	In	Na_Trochiliopsis	JQ918367	100	0.86	SAR	Alv	Ci	In	Sp	Caryotricha-minuta	2	0.08702	7	82	0	0	52	0	0	0	0	0	0	0	0	0	0	0	1	0	0	0	0	0	0	0	0	0	0	0	0	0	0	0
OTU444	Euk	SAR	Str	Pe	un	_Coccoid	U40926	100	1	SAR	Str	Pe	un		Coccoid-pelagophyte	2	0.00708	11	81	0	0	0	0	0	0	8	0	0	0	1	0	40	0	0	0	2	0	0	0	1	0	0	0	0	0	5	0	0	0
OTU519	Euk	SAR	Rhi	Ce	Ce	Ce_Paracercomonas	FJ790720	100	0.96	SAR	Rhi	Ce	Ce	Ce	Paracercomonas-oxoniensis	6	0.04297	14	79	7	0	0	35	0	0	0	0	0	0	0	0	0	0	2	0	0	2	0	0	1	0	0	0	0	0	9	0	0	0
OTU605	Euk	SAR	Str	Ba	Ba	Ba_Stauroneis	KM116116	100	0.97	SAR	Str	Ba	Me	Bi	Psammoneis-obaidii	8	0.08625	13	79	0	0	4	0	0	0	0	0	2	0	0	0	0	1	0	0	0	0	0	0	0	0	0	0	0	0	0	0	0	0
OTU454	Euk	SAR	Str	PX	Xa	Tr_Tribonema	HQ710588	100	1	SAR	Str	PX	Xa	Mi	Botryidiopsidaceae-sp	5	0.00071	9	79	0	0	0	0	0	0	21	0	0	0	0	0	0	0	0	0	0	0	0	1	0	0	0	0	0	3	1	0	0	0
OTU506	Euk	SAR	Rhi	Ce	Im	Si_Protaspis	FJ824125	100	0.99	SAR	Rhi	Ce	Im	Si	Protaspis-sp	11	0.04347	1	79	0	0	0	0	0	0	0	0	0	0	0	0	0	0	0	0	0	0	0	0	0	0	0	0	0	0	0	0	0	0
OTU389	Euk	SAR	Rhi	Ce	Ph	Ph_Porospathis	AB998895	100	0.89	SAR	Rhi	Ce	Ce	Sa	Cholamonas-cyrtodiopsidis	3	0.24878	9	77	0	0	0	0	0	0	0	0	2	0	0	0	0	0	0	0	0	0	0	0	0	0	0	2	0	0	0	0	0	0
OTU461	Euk	SAR	Str	Ba	Co	Ch_Chaetoceros	AB847418	100	1	SAR	Str	Ba	Co	Ch	Chaetoceros-setoense	3	0.01319	19	76	0	0	5	0	0	0	0	0	0	0	2	0	13	0	0	0	0	0	0	1	0	0	11	0	0	3	0	0	0	0
OTU465	Euk	SAR	Alv	Ci	In	Sp_Strombidium	KP260510	100	0.96	SAR	Alv	Ci	In	Sp	Strombidium-capitatum	10	0.15771	20	75	0	1	0	0	0	1	0	14	0	0	0	5	0	2	0	2	1	0	0	4	0	3	0	13	8	0	0	3	0	2
OTU493	Euk	SAR	Str	In		_Incisomonas	JN848814	100	0.98	SAR	Str	In			Incisomonas-marina	3	0.02293	1	75	0	0	0	0	0	0	0	0	0	0	0	0	0	0	0	0	0	0	0	0	0	0	0	0	0	0	0	0	0	0
OTU457	Euk	SAR	Alv	Co	Co	_Colpodella	AY078092	100	0.99	SAR	Alv	Co	Co		Colpodella-pontica	2	0.00789	7	74	0	0	0	0	0	0	0	0	0	0	0	0	0	0	0	0	0	0	1	0	0	0	0	0	0	2	0	0	0	0
OTU295	Euk	SAR	Str	Ba	Co	Rh_Guinardia	AJ535192	100	1	SAR	Str	Ba	Co	Rh	Guinardia-delicatula	4	0.05568	6	74	0	0	0	0	0	0	0	0	0	0	0	0	0	2	0	0	0	0	0	4	0	0	0	0	0	0	1	0	0	0
OTU518	Euk	SAR	Alv	Ci	In	Sp_Protogastrostyla	EF194083	100	0.96	SAR	Alv	Ci	In	Sp	Protogastrostyla-pulchra	3	0.065	4	74	29	0	0	8	3	0	0	0	0	0	0	0	0	0	0	0	0	0	0	0	0	0	0	0	0	0	0	0	0	0
OTU509	Euk	SAR	Str	Ba	Ba	Ba_Navicula	KT072983	100	0.96	SAR	Str	Ba	un		Bacillariophyta-sp	3	0.10075	1	74	0	0	0	0	0	0	0	0	0	0	0	0	0	0	0	0	0	0	0	0	0	0	0	0	0	0	0	0	0	0
OTU650	Euk	SAR	Str	Oo	Py	Py_Halophytophthora	KT886040	100	1	SAR	Str	Oo	Py	Py	Halophytophthora-cf	2	0	7	73	0	0	11	0	0	0	0	0	0	0	0	0	0	0	7	0	0	45	0	0	0	0	0	0	0	0	0	0	0	0
OTU514	Euk	SAR	Str	Ch	Ch	Di_Dinobryon	EU024980	100	0.98	SAR	Str	Ch	Ch	Pa	Paraphysomonas-foraminifera	3	0.06961	22	72	0	0	10	0	0	0	2	0	0	0	4	1	0	3	3	0	0	7	0	1	2	0	0	0	0	4	2	0	0	0
OTU553	Euk	SAR	Alv	Di	Go	Am_Azadinium	KR362890	100	0.96	SAR	Alv	Di	Pe	He	Heterocapsa-arctica	3	0.06365	15	72	0	0	0	0	7	0	0	0	0	0	1	0	0	0	1	0	0	9	0	0	1	0	0	0	0	7	0	0	0	0
OTU521	Euk	SAR	Rhi	Ce	Im	Si_Assulina	EF456749	100	0.8	SAR	Rhi	Ce	Im	Si	Euglypha-tuberculata	6	0.53647	12	72	0	0	0	2	0	0	9	0	0	0	0	0	0	0	0	0	0	0	0	0	0	0	1	0	3	0	1	0	0	0
OTU492	Euk	SAR	Alv	Di	Sy	Sy_Hematodinium	EU856716	100	0.84	SAR	Alv	Ap	Co	Gr	Psychodiella-sp	2	0.44816	2	72	71	0	0	0	0	0	0	0	0	0	0	0	0	0	0	0	0	0	0	0	0	0	0	0	0	0	0	0	0	0
OTU494	Euk	SAR	Rhi	Ce	De	Cl_Clathrulina	AY305009	100	0.89	SAR	Rhi	Ce	De	Cl	Clathrulina-elegans	2	0.17776	2	72	0	30	0	0	0	0	0	0	0	0	0	0	0	0	0	0	0	0	0	0	0	0	0	0	42	0	0	0	0	0
OTU528	Euk	SAR	Str	Di	Pe	Ap_Apedinella	HQ710559	100	0.98	SAR	Str	Di	Rh	Rh	Rhizochromulina-cf	11	0.06369	31	71	0	0	1	0	5	4	0	0	4	0	0	0	2	0	2	0	2	2	0	0	1	0	0	0	0	0	1	0	1	0
OTU504	Euk	SAR	Rhi	Ce	Ce	Ce_Massisteria	AF174370	100	0.92	SAR	Rhi	Ce	Re	un	Reticulamoeba-sp	6	0.19096	18	70	0	2	34	0	1	0	0	0	0	0	0	0	5	2	0	0	0	0	0	0	0	0	0	0	1	1	4	0	0	0
OTU459	Euk	SAR	Str	Ba	Co	Ch_Chaetoceros	HQ710553	100	0.98	SAR	Str	Ba	Co	Rh	Rhizosolenia-similoides	2	0.11645	17	70	0	0	0	0	0	4	0	0	0	10	6	2	0	2	0	0	0	0	0	12	0	1	0	0	0	0	1	1	0	0
OTU429	Euk	SAR	Rhi	Ce	Im	Si_Corythion	EF456751	100	0.96	SAR	Rhi	Ce	Ce	Ce	Massisteria-sp	7	0.12931	17	69	0	0	0	0	12	0	0	0	4	3	0	0	0	0	0	0	0	0	0	0	5	0	0	0	0	0	0	0	0	0
OTU499	Euk	SAR	Str	Ba	Fr	Fr_Licmophora	AB430601	100	0.86	SAR	Rhi	Ce			Auranticordis-quadriverberis	11	0.21355	14	69	0	0	0	0	0	0	0	0	25	0	0	0	0	1	0	0	1	0	0	0	4	0	0	0	0	3	0	0	0	0
OTU484	Euk	SAR	Rhi	Ce	Th	Ps_Pseudodifflugia	AJ418794	100	0.97	SAR	Rhi	Ce	Th	Tr	Trachyrhizium-urniformis	5	0.05905	14	69	0	0	0	0	1	0	0	0	0	1	0	0	0	0	11	0	13	2	0	3	0	0	0	0	0	0	3	0	0	0
OTU411	Euk	SAR	Alv	Ci	In	Sp_Holosticha	DQ059583	100	0.98	SAR	Alv	Ci	In	Sp	Holosticha-diademata	4	0.0007	9	69	0	0	0	0	4	0	0	0	0	0	0	0	9	0	0	0	0	0	0	0	0	0	3	0	0	0	5	0	0	0
OTU427	Euk	SAR	Alv	Ci	In	Sp_Arcuseries	KC896648	100	0.97	SAR	Alv	Ci	In	Sp	Apogastrostyla-rigescens	4	0.03008	3	69	0	0	0	0	0	0	0	0	0	0	0	14	0	0	0	0	0	0	0	0	0	0	0	0	0	0	0	0	0	0
OTU485	Euk	SAR	Str	Ra	Ch	Ch_Chattonella	AB217628	100	0.89	SAR	Str	Ra	Ch	Ch	Heterosigma-akashiwo	3	0.26634	19	68	0	0	0	0	0	1	0	0	2	0	0	0	0	0	0	0	0	0	0	0	0	0	0	0	0	7	1	0	0	2
OTU549	Euk	SAR	Alv	Ap	Co	Gr_Stenophora	FJ459760	100	0.99	SAR	Alv	Ap	Co	Gr	Stenophora-robusta	2	0.23688	1	68	0	0	0	0	0	0	0	0	0	0	0	0	0	0	0	0	0	0	0	0	0	0	0	0	0	0	0	0	0	0
OTU356	Euk	SAR	Str	Ba	Ba	Ba_Amphiprora	AY485468	100	0.99	SAR	Str	Ba	Co	Co	Ellerbeckia-sp	8	0.09397	6	67	0	0	0	0	0	0	0	4	0	0	0	0	0	0	0	0	0	0	0	0	0	0	0	0	0	0	0	0	0	0
OTU539	Euk	SAR	Rhi	Ce	Im	Si_Sphenoderia	KF539410	100	0.96	SAR	Rhi	Ce	Im	Si	Sphenoderia-macrolepis	5	0.04241	5	67	0	0	0	11	0	0	0	0	0	47	0	0	0	0	0	0	0	0	0	0	0	0	5	0	0	0	2	0	0	0
OTU505	Euk	SAR	Str	Di	Pe	un_Pedinellales	JF794054	100	0.98	SAR	Str	Di	Pe	un	Pedinellales-sp	6	0.06333	19	66	0	0	0	0	0	0	0	0	0	0	0	0	0	0	0	0	0	7	0	0	3	0	7	0	0	6	0	0	0	0
OTU510	Euk	SAR	Str	Ba	Co	Ch_Chaetoceros	AB430592	100	0.96	SAR	Str	Ba	Co	Ch	Chaetoceros-radicans	7	0.14616	18	66	0	0	0	0	0	1	0	4	0	0	0	6	0	8	0	0	0	0	1	0	0	3	0	5	6	0	0	3	0	3
OTU552	Euk	SAR	Rhi	un		_Rhizaria	KM401881	100	1	SAR	Rhi	un			Rhizaria-sp	5	0.01359	6	66	0	0	16	0	0	0	0	0	0	0	0	0	0	0	15	0	3	22	0	0	0	0	0	0	0	0	0	0	0	0
OTU451	Euk	SAR	Str	PX	Xa	Mi_Bumilleriopsis	AJ579331	100	1	SAR	Str	Ba	un		Bacillariophyta-sp	13	0.00075	10	65	0	0	0	0	0	2	0	6	2	11	0	0	0	0	0	8	1	0	0	0	0	6	0	15	0	0	0	0	0	12
OTU501	Euk	SAR	Str	Di	Pe	Ap_Apedinella	HQ710559	100	0.95	SAR	Str	Di	Rh	Rh	Rhizochromulina-cf	10	0.17267	19	64	0	0	0	0	0	0	0	0	0	0	0	0	0	0	0	0	1	3	0	1	0	0	6	1	0	12	0	0	0	0
OTU616	Euk	SAR	Rhi	Ce	Im	Si_Sphenoderia	KF539409	100	0.96	SAR	Rhi	Ce	Im	Si	Ovulinata-parva	5	0.12042	14	64	15	3	0	0	0	0	0	0	1	0	1	0	0	0	1	0	0	0	0	7	0	0	0	0	0	0	0	1	2	0
OTU607	Euk	SAR	Str	Ba	Ba	Ba_Rhopalodia	HQ912407	100	0.96	SAR	Rhi	Ce			Marine-flagellate	3	0.03984	13	64	0	0	0	0	0	0	0	0	0	0	0	0	0	0	0	0	0	0	0	0	0	0	0	0	1	1	0	0	0	0
OTU601	Euk	SAR	Alv	Ci	In	Sp_Strombidium	KP260510	100	0.93	SAR	Alv	Ci	In	Sp	Strombidium-capitatum	8	0.15414	1	64	0	0	0	64	0	0	0	0	0	0	0	0	0	0	0	0	0	0	0	0	0	0	0	0	0	0	0	0	0	0
OTU705	Euk	SAR	Str	Ba	Fr	Fr_Synedra	EF491890	100	0.96	SAR	Str	Ba	Fr	Fr	Licmophora-remulus	12	0.08592	25	63	0	1	0	0	0	1	0	2	0	0	0	1	0	6	0	0	0	0	0	0	0	2	0	0	1	0	0	3	0	2
OTU495	Euk	SAR	Alv	Di	Pe	Ox_Sabulodinium	DQ975474	100	0.97	SAR	Alv	Di	Pe	Ox	Sabulodinium-undulatum	3	0.08519	14	63	0	2	0	0	0	10	0	0	0	2	3	0	0	0	0	0	0	0	0	3	5	0	0	0	3	3	0	0	0	0
OTU530	Euk	SAR	Rhi	Ce	Im	Si_Euglypha	AJ418782	100	0.82	SAR	Rhi	Ce	Im	Si	Euglypha-tuberculata	4	0.37593	4	63	0	0	0	0	0	0	0	0	1	0	0	0	0	0	0	0	0	0	0	0	0	0	0	0	0	0	0	0	0	0
OTU517	Euk	SAR	Str	Ba	Me	Bi_Terpsinoe	KJ577872	100	0.97	SAR	Str	Ba	Co	Ch	Chaetoceros-muellerii	8	0.16156	15	62	0	0	0	0	0	0	0	0	0	0	0	0	0	0	0	1	0	0	5	0	0	0	0	1	5	4	0	0	0	0
OTU376	Euk	SAR	Rhi	Ce	Im	Si_Thaumatomastix	GQ144681	100	0.98	SAR	Rhi	Ce	Im	Si	Thaumatomastix-sp	4	0.0559	12	62	0	0	3	0	0	0	0	1	0	0	0	0	0	3	0	0	0	0	0	0	0	0	0	0	5	0	1	0	0	0
OTU502	Euk	SAR	Str	Ba	Ba	Ba_Navicula	KT072983	100	0.97	SAR	Str	Ba	Co	Co	Ellerbeckia-sp	5	0.1476	8	62	0	0	0	0	0	0	0	0	0	0	0	27	0	0	0	4	0	0	0	0	0	0	0	0	0	0	0	0	0	0
OTU473	Euk	SAR	Alv	Ci	In	Sp_Deviata	KJ766110	100	0.98	SAR	Alv	Ci	In	Sp	Protogastrostyla-pulchra	4	0.04481	2	62	0	0	0	0	0	0	0	0	0	0	0	0	0	0	0	0	0	0	0	0	0	0	0	0	0	0	0	0	0	0
OTU481	Euk	SAR	Rhi	Ce	Im	Si_Assulina	EF456749	100	0.9	SAR	Rhi	Ce	Im	Ma	Pseudopirsonia-mucosa	7	0.20994	20	61	3	0	0	0	0	0	0	0	0	0	2	0	0	1	0	0	2	0	0	0	0	0	0	0	4	6	0	0	1	0
OTU555	Euk	SAR	Alv	Di	Sy	Am_Amoebophrya	AY775284	100	0.95	SAR	Alv	Di	Sy	Am	Amoebophrya-sp	13	0.11186	14	61	0	0	0	0	0	0	0	0	0	0	7	0	0	0	4	0	4	0	0	0	0	0	0	0	0	6	10	0	0	0
OTU476	Euk	SAR	Str	Ba	Ba	Ba_Berkeleya	KJ577848	100	1	SAR	Str	Ba	Me	Bi	Dimeregramma-sp	5	0.00106	11	61	0	0	0	1	0	3	0	0	0	0	0	0	0	0	0	16	0	0	0	0	0	3	0	0	0	0	0	0	0	0
OTU564	Euk	SAR	Rhi	Ce	Im	Si_Euglypha	EF456755	100	0.99	SAR	Rhi	Ce	Im	Si	Sphenoderia-lenta	3	0.00543	6	61	0	1	0	0	0	0	0	15	0	25	0	0	0	0	0	0	0	0	0	0	0	0	0	0	0	0	0	0	0	0
OTU632	Euk	SAR	Alv	Di	Di	Di_Phalacroma	AB551248	100	0.98	SAR	Alv	Di	Pe	un	Baldinia-anauniensis	2	0.00708	5	61	0	0	55	0	0	0	0	0	0	0	0	0	0	1	0	0	0	0	0	0	0	0	0	0	0	0	0	1	0	0
OTU267	Euk	SAR	Alv	Ci	In	Sp_Diophrys	DQ353851	100	1	SAR	Alv	Ci	In	Sp	Diophrys-apoligothrix	2	0.0008	4	61	0	36	0	0	0	0	0	0	0	0	0	0	0	0	0	0	0	0	0	0	0	0	0	0	0	0	0	0	0	0
OTU503	Euk	SAR	Alv	Ci	In	Ol_Cohnilembus	HM236339	100	0.99	SAR	Alv	Ci	In	Ol	Cohnilembus-verminus	3	0.02075	6	60	0	0	0	0	2	0	0	0	0	0	0	0	47	0	0	0	0	0	0	5	0	0	1	0	0	0	0	0	0	0
OTU488	Euk	SAR	Str	Ba	Fr	Fr_Licmophora	AY633756	100	1	SAR	Str	Ba	Me	Bi	Psammoneis-obaidii	11	0.00645	8	59	0	0	0	0	0	0	0	3	0	0	0	0	0	0	0	0	0	0	0	4	0	12	0	0	0	0	0	0	0	0
OTU475	Euk	SAR	Alv	Di	Sy	Am_Amoebophrya	AY775284	100	0.94	SAR	Alv	Di	Sy	Am	Amoebophrya-sp	14	0.20198	6	59	0	0	0	0	0	0	0	0	0	0	0	0	0	4	0	0	0	0	0	0	0	0	0	0	3	0	0	0	0	0
OTU507	Euk	SAR	Alv	Ci	In	Li_Epiphyllum	GU574809	100	0.98	SAR	Alv	Ci	In	Li	Epiphyllum-shenzhenense	2	0.08091	3	59	0	0	0	0	0	0	0	0	0	0	0	0	0	55	0	0	0	0	0	0	0	0	0	0	0	0	0	0	0	0
OTU628	Euk	SAR	Alv	Ci	In	Pr_Pelagothrix	AB486009	100	0.95	SAR	Alv	Ci	In	Pr	Coleps-sp	2	0.17266	1	59	0	0	0	59	0	0	0	0	0	0	0	0	0	0	0	0	0	0	0	0	0	0	0	0	0	0	0	0	0	0
OTU743	Euk	SAR	Rhi	Ce	Ce	Ce_Paracercomonas	FJ790720	100	0.95	SAR	Str	La	Th	Ap	Aplanochytrium-sp	3	0.06685	24	58	0	2	0	0	0	0	0	0	2	0	0	0	0	0	4	0	0	0	0	0	5	0	0	1	0	3	2	0	0	0
OTU531	Euk	SAR	Rhi	Ce	Im	Si_Protaspis	FJ824125	100	0.98	SAR	Rhi	Ce	Th	Ch	Rhogostoma-minus	6	0.047	14	58	0	0	0	0	0	0	0	0	0	0	0	3	1	0	0	0	0	0	0	3	3	0	0	7	1	0	0	0	0	0
OTU497	Euk	SAR	Alv	Ci	In	Ol_Apofrontonia	AM072621	100	0.89	SAR	Alv	Ci	In	Pr	Prorodon-viridis	11	0.08807	17	57	0	0	0	0	0	0	0	0	0	0	0	0	0	0	0	0	3	0	2	0	4	0	6	3	1	3	0	0	0	0
OTU585	Euk	SAR	Str	Ba	Fr	Fr_Staurosira	EF465491	100	0.95	SAR	Str	Ba	Ba	Ba	Cocconeis-cf	2	0.11963	10	57	0	0	0	0	0	0	0	0	2	1	0	0	0	7	0	0	0	0	5	0	0	0	0	0	0	0	2	0	0	0
OTU541	Euk	SAR	Str	Di	Di	Di_Dictyocha	U14385	100	0.91	SAR	Str	Di	Di	Vi	Vicicitus-globosus	6	0.11224	3	57	0	0	0	0	0	0	0	12	0	0	0	0	0	0	0	0	2	0	0	0	0	0	0	0	0	0	0	0	0	0
OTU538	Euk	SAR	Rhi	Ce	Im	Si_Assulina	EF456749	100	0.96	SAR	Rhi	Ce	Im	Si	Ovulinata-parva	4	0.16214	2	57	0	0	0	0	0	0	0	0	0	0	0	0	0	0	0	0	0	0	0	0	0	0	0	0	0	0	0	0	0	0
OTU644	Euk	SAR	Rhi	Ce	Ce	Ce_Paracercomonas	FJ790727	100	0.94	SAR	Str	Oo	Ol	Ol	Olpidiopsis-pyropiae	2	0.16389	1	57	0	0	57	0	0	0	0	0	0	0	0	0	0	0	0	0	0	0	0	0	0	0	0	0	0	0	0	0	0	0
OTU471	Euk	SAR	Str	Ba	Ba	Ba_Stauroneis	KM116116	100	0.99	SAR	Str	Ba	Me	Bi	Psammoneis-obaidii	9	0.04531	11	56	0	0	4	0	0	0	0	0	0	0	0	0	0	0	0	11	0	0	0	3	0	0	0	0	0	0	0	2	0	0
OTU315	Euk	SAR	Alv	Ci	In	Sp_Uronychia	HQ380024	100	1	SAR	Alv	Ci	In	Sp	Uronychia-binucleata	2	0.02417	9	56	0	0	0	0	0	0	1	21	0	0	7	0	0	0	0	2	0	0	0	0	0	0	0	0	8	0	0	0	0	2
OTU677	Euk	SAR	Alv	Co	Co	_Colponema	KJ598081	100	0.94	SAR	Str	Bi	Ca		Caecitellus-paraparvulus	4	0.24142	7	56	0	0	0	0	0	0	0	0	0	0	0	0	0	0	0	0	0	0	0	0	2	0	0	0	0	1	0	2	0	0
OTU498	Euk	SAR	Alv	Ci	In	Sp_Strombidinopsis	KR263893	100	0.95	SAR	Alv	Ci	In	Sp	Strobilidium-sp	3	0.20041	6	56	0	0	0	14	0	0	0	0	0	0	2	0	0	1	0	0	0	0	0	0	0	0	0	0	0	0	0	0	20	0
OTU511	Euk	SAR	Str	Ba	Ba	Ba_Pinnularia	AM743094	100	0.96	SAR	Rhi	Ce			Aurigamonas-solis	2	0.07966	12	55	4	0	1	0	0	0	0	0	0	0	0	0	0	1	0	0	0	0	0	8	7	0	0	3	0	22	0	0	0	0
OTU544	Euk	SAR	Rhi	Ce	Ce	Ce_Paracercomonas	FJ790727	100	0.91	SAR	Rhi	Ce	Ce	Ce	Paracercomonas-elongata	3	0.1828	7	55	0	0	0	0	0	0	4	0	0	0	0	0	0	0	0	0	0	0	0	0	0	0	0	8	0	0	0	0	0	0
OTU562	Euk	SAR	Alv	Di	Gy	Gy_Gyrodinium	AB120001	100	0.98	SAR	Alv	Di	Gy	Gy	Gyrodinium-cf	5	0.06097	5	55	0	0	0	0	0	0	0	0	0	6	0	0	0	0	0	0	0	0	0	0	0	0	0	0	1	0	0	0	0	0
OTU669	Euk	SAR	Str	Ba	Fr	Fr_Licmophora	AB430601	100	0.9	SAR	Str	Pe	un		Pelagophyceae-sp	4	0.16071	2	55	0	0	54	0	0	0	0	0	0	0	0	0	0	0	0	0	0	0	0	1	0	0	0	0	0	0	0	0	0	0
OTU835	Euk	SAR	Str	Ba	Me	Bi_Hemiaulus	KC309496	100	0.97	SAR	Str	Ba	Ba	Ba	Bacillariophycidae-sp	3	0.07038	31	54	0	0	0	0	0	2	0	5	0	2	0	1	0	3	0	1	0	0	2	2	2	1	0	1	1	3	1	0	0	0
OTU512	107r									SAR	Str	Ba	un		Bacillariophyta-sp	14	0.00075	14	54	0	0	0	0	1	0	0	1	0	0	0	0	0	0	0	0	0	0	0	0	0	0	0	0	0	0	0	0	0	4
OTU288	Euk	SAR	Str	Ba	Ba	Ba_Haslea	AY485488	100	1	SAR	Str	Ba	Ba	Ba	Haslea-nipkowii	2	0.02555	8	54	0	0	0	0	0	0	0	0	0	0	0	0	0	0	0	30	0	0	0	2	0	0	0	9	0	0	0	0	0	0
OTU571	Euk	SAR	Str	Ba	Co	Th_Thalassiosira	DQ514866	100	0.92	SAR	Str	Ba	Ba	Ba	Amphora-commutata	9	0.08633	7	54	0	0	0	0	1	0	0	0	0	0	0	0	0	0	28	0	1	0	0	0	0	0	0	0	0	0	0	0	0	0
OTU703	Euk	SAR	Rhi	Ce	Im	Si_Ovulinata	HQ121432	100	0.98	SAR	Rhi	Ce	Im	Si	Ovulinata-parva	4	0.02254	1	54	0	0	0	54	0	0	0	0	0	0	0	0	0	0	0	0	0	0	0	0	0	0	0	0	0	0	0	0	0	0
OTU513	Euk	SAR	Str	Pi		_Pirsonia	AJ561113	100	0.88	SAR	Str	Ba	Fr	Fr	Licmophora-remulus	17	0.11355	33	53	0	0	1	0	0	1	1	1	0	0	1	2	0	2	1	1	1	0	3	1	0	2	1	3	0	0	0	3	2	2
OTU558	Euk	SAR	Alv	Ci	In	Sp_Laboea	AF399154	100	0.96	SAR	Alv	Ci	In	Sp	Laboea-strobila	4	0.11905	23	53	0	0	0	0	0	6	1	3	0	0	0	1	0	3	0	2	0	0	0	0	0	3	0	9	1	1	0	4	0	1
OTU568	Euk	SAR	Str	Ba	Me	Bi_Terpsinoe	KJ577872	100	0.97	SAR	Str	Ba	Co	Ch	Chaetoceros-muellerii	8	0.10198	23	53	0	0	0	0	0	1	0	2	0	2	0	1	0	0	0	5	0	0	0	2	0	3	0	2	1	0	0	2	0	0
OTU352	Euk	SAR	Rhi	Ce	Th	Le_Lecythium	KP728379	100	0.97	SAR	Rhi	Ce	Ce	Ce	Cercomonas-alexieffi	4	0.00162	8	53	0	0	0	0	0	6	0	0	0	0	0	0	0	0	0	0	0	0	0	0	0	0	0	12	0	0	0	0	1	0
OTU721	Euk	SAR	Str	Oo	Ol	Ol_Olpidiopsis	KM210530	100	0.91	SAR	Str	In			Incisomonas-marina	4	0.09143	7	53	0	0	0	0	0	0	0	0	0	0	0	0	0	0	11	0	0	0	0	0	0	0	0	1	0	1	0	0	0	0
OTU516	Euk	SAR	Rhi	Ce	Im	Si_Protaspis	FJ824125	100	0.97	SAR	Rhi	Ce	Im	Si	Protaspis-sp	3	0.06665	1	53	0	0	0	0	0	0	0	0	0	0	0	0	0	0	0	0	0	0	0	0	0	53	0	0	0	0	0	0	0	0
OTU524	Euk	SAR	Str	Ba	Ba	Ba_Epithemia	HQ912409	100	0.96	SAR	Str	Ba	Fr	Fr	Neofragilaria-stilus	2	0.04409	16	52	0	0	0	0	0	0	0	0	3	0	0	0	0	0	4	0	0	0	0	0	3	0	0	0	0	2	0	0	6	0
OTU574	Euk	SAR	Alv	Ch	Ch	_Chromera	JN986789	100	0.89	SAR	Alv	Di	Gy	Gy	Amphidinium-carterae	2	0.26242	3	52	0	0	0	0	0	0	0	0	0	0	0	0	0	0	0	0	0	0	30	0	0	0	0	0	0	0	0	0	0	0
OTU450	Euk	SAR	Alv	Ci	In	Ol_Platynematum	KF301567	100	0.89	SAR	Alv	Ci	In	Ol	Conchophthirus-cucumis	2	0.16374	3	52	0	0	0	0	0	0	0	0	0	0	0	0	0	0	0	0	0	0	0	0	0	0	0	0	0	0	0	0	0	0
OTU567	Euk	SAR	Alv	Ci	In	Ol_Miamiensis	JN885091	100	0.94	SAR	Alv	Ci	In	Ol	Parauronema-virginianum	3	0.26086	1	52	0	0	0	0	0	0	0	0	0	0	0	0	0	0	0	0	0	0	0	0	52	0	0	0	0	0	0	0	0	0
OTU545	Euk	SAR	Rhi	Ce	Im	Si_Protaspis	FJ824125	100	0.97	SAR	Rhi	Ce	Im	Si	Protaspis-sp	10	0.00488	3	51	12	8	0	0	0	0	0	0	0	0	0	0	0	0	0	0	0	0	0	0	0	0	0	0	0	0	0	0	0	0
OTU640	Euk	SAR	Rhi	Ce	Im	Si_Protaspis	FJ824125	100	0.98	SAR	Rhi	Ce	Th	Cr	Cryothecomonas-aestivalis	6	0.0129	3	51	0	0	29	0	0	0	0	0	0	0	0	0	0	0	0	0	0	0	0	0	0	0	0	0	0	0	0	0	0	0
OTU582	Euk	SAR	Rhi	un		_Rhizaria	KM401881	100	0.98	SAR	Rhi	un			Rhizaria-sp	5	0.01359	2	51	0	0	0	0	0	0	0	0	0	0	0	0	0	0	0	0	0	0	0	0	0	0	0	0	0	0	0	0	0	0
OTU589	Euk	SAR	Rhi	Ce	Gl	Al_Allapsa	AF411265	100	0.96	SAR	Rhi	Ce			Nuclearia-like-filose	3	0.09686	7	50	0	0	0	0	0	0	0	0	0	0	0	0	0	0	0	0	0	0	0	0	0	0	9	0	0	0	0	0	0	8
OTU560	Euk	SAR	Str	Ba	Co	Co_Coscinodiscus	KC309528	100	0.95	SAR	Str	Ba	Co	Co	Coscinodiscus-wailesii	3	0.13668	6	50	0	0	9	32	0	1	0	0	0	0	0	0	0	0	0	0	2	0	0	0	0	0	0	0	0	0	0	0	0	4
OTU791	Euk	SAR	Str	Ba	Co	Th_Cyclotella	AY485499	100	0.92	SAR	Str	Ba	Ba	Ba	Amphora-commutata	10	0.08609	13	49	2	0	0	0	3	0	0	0	0	0	1	0	0	0	1	0	0	0	0	0	0	0	0	0	1	0	0	0	0	1
OTU550	Euk	SAR	Str	Bi	un	Ha_Halocafeteria	KF545980	100	0.91	SAR	Str	Ba	Ba	Ba	Amphora-sp	2	0.23929	10	49	0	0	0	0	2	0	0	0	1	21	0	0	0	4	0	0	0	0	0	0	6	0	0	0	0	0	5	0	0	0
OTU487	Euk	SAR	Alv	Ci	In	Ol_Platynematum	KF301567	100	0.82	SAR	Rhi	un	Co		Corallomyxa-tenera	5	0.27466	9	49	0	0	0	9	0	0	0	0	0	0	0	0	0	0	0	0	0	0	0	0	0	0	0	0	0	0	1	0	0	0
OTU525	Euk	SAR	Alv	Ci	In	Pr_Pelagothrix	AB486009	100	0.96	SAR	Alv	Ci	In	Pr	Prorodon-viridis	10	0.04703	7	49	0	0	0	0	0	0	0	0	0	0	0	0	0	0	0	0	0	0	0	0	1	0	0	0	0	0	0	0	0	0
OTU537	Euk	SAR	Alv	Ci	un	_Ciliate	AM412525	100	0.93	SAR	Alv	Ci	In	Na	Discotricha-papillifera	3	0.14841	4	49	0	0	0	0	0	0	0	0	0	0	0	0	0	0	0	0	0	0	0	0	0	24	0	0	0	0	0	1	0	0
OTU569	Euk	SAR	Alv	Ap	Co	Gr_Lecudina	AY196706	100	0.94	SAR	Alv	Ap	Co	Gr	Lecudina-polymorpha	4	0.3617	2	49	0	0	0	0	0	0	0	0	0	0	0	0	0	0	0	0	0	0	0	0	0	0	0	0	0	0	0	0	0	0
OTU556	Euk	SAR	Str	Ba	Ba	Ba_Planothidium	KJ658411	100	0.89	SAR	Str	PX	Xa	Mi	Ophiocytium-majus	2	0.15945	14	48	0	0	0	0	0	0	0	2	0	0	0	0	0	0	0	0	0	3	0	0	2	0	5	0	0	6	0	0	0	0
OTU332	Euk	SAR	Rhi	Ce	Th	Le_Lecythium	KP728379	100	0.99	SAR	Rhi	Ce	De	Cl	Clathrulina-elegans	5	0.09251	8	48	22	0	0	0	0	0	0	0	0	4	0	0	0	0	1	0	0	0	0	0	0	0	0	0	0	0	0	0	6	0
OTU649	Euk	SAR	Str	Di	Pe	Ps_Pseudopedinella	HQ710562	100	0.93	SAR	Str	Di	Rh	Rh	Rhizochromulina-cf	3	0.13119	7	48	0	0	0	0	4	0	2	0	0	0	0	0	7	2	0	0	0	0	0	0	0	0	0	0	0	0	0	0	0	0
OTU617	Euk	SAR	Alv	Ci	In	Ph_Dysteria	KC753494	100	0.99	SAR	Alv	Ci	In	Ph	Dysteria-cf	3	0.02799	3	48	0	0	0	0	0	0	0	0	0	0	0	0	0	0	0	0	0	0	0	0	0	0	0	0	0	0	0	0	0	0
OTU734	Euk	SAR	Rhi	un		_Rhizaria	KM401881	100	0.99	SAR	Rhi	un			Rhizaria-sp	4	0.03293	1	48	0	0	48	0	0	0	0	0	0	0	0	0	0	0	0	0	0	0	0	0	0	0	0	0	0	0	0	0	0	0
OTU600	Euk	SAR	Str	Ba	Co	Ch_Chaetoceros	AB847415	100	0.94	SAR	Str	Ba	Fr	Fr	Licmophora-grandis	19	0.09569	22	47	0	0	0	0	0	2	0	2	0	1	0	0	0	4	0	1	0	0	1	0	0	0	0	3	5	0	0	2	0	0
OTU527	Euk	SAR	Alv	Ap		_Apicomplexa	AF238264	100	0.89	SAR	Alv	Di	Ph	Ph	Phytodinium-sp	4	0.24047	3	47	0	0	0	0	0	0	0	0	0	0	0	0	0	0	0	0	0	0	0	6	0	0	0	0	0	0	0	0	0	0
OTU728	Euk	SAR	Alv	Di	Di	Di_Dinophysis	HM853815	100	0.99	SAR	Alv	Di	Di	Di	Histioneis-cymbalaria	2	0.01736	2	47	0	0	46	0	0	0	0	0	0	0	0	0	0	0	0	0	0	0	0	0	0	0	0	0	0	0	0	0	0	0
OTU656	Euk	SAR	Alv	Co	Co	_Colponema	KJ598081	100	0.93	SAR	Rhi	Ce	Im	Si	Cyphoderia-major	5	0.21941	25	46	0	0	0	0	0	1	0	1	0	4	0	3	0	0	0	0	3	0	2	0	0	2	1	2	1	1	1	0	0	0
OTU438	Euk	SAR	Alv	Ci	In	Ol_Lembadion	KM222113	100	0.91	SAR	Alv	Ci	In	Na	Discotricha-papillifera	3	0.13143	2	46	0	0	0	0	0	0	0	0	0	0	0	0	0	0	0	0	0	0	0	1	0	0	0	0	0	0	0	0	0	0
OTU559	Euk	SAR	Str	Ch	Ch	Di_Dinobryon	EU024980	100	0.98	SAR	Str	Sc			Schizocladia-ischiensis	5	0.05661	16	45	0	0	0	0	0	0	0	0	0	0	0	0	1	0	0	1	0	5	0	0	0	0	5	0	0	5	0	0	0	0
OTU466	Euk	SAR	Rhi	Ce	Im	Si_Protaspis	FJ824122	100	0.96	SAR	Rhi	Ce	Th	Ch	Rhogostoma-minus	6	0.12568	7	45	0	0	0	0	0	0	0	0	0	0	0	0	0	0	0	0	0	0	0	0	0	0	0	0	3	0	0	0	0	0
OTU588	Euk	SAR	Rhi	Ce	Im	Si_Trachelocorythion	AJ418789	100	0.97	SAR	Rhi	Ce	Im	Si	Trachelocorythion-pulchellum	7	0.04945	5	45	0	0	0	0	0	0	0	0	0	0	0	0	0	0	1	0	0	0	0	0	0	0	0	0	0	0	0	0	0	0
OTU606	Euk	SAR	Str	Ba	Co	Co_Corethron	KC309527	100	0.96	SAR	Str	Ba	Co	Co	Corethron-sp	3	0.10915	17	44	0	0	0	0	0	2	0	3	0	3	0	4	0	3	0	1	0	0	0	0	0	2	0	4	2	0	0	0	0	0
OTU486	Euk	SAR	Str	Ba	Fr	Fr_Striatella	JX419383	100	1	SAR	Str	Ba	Fr	Fr	Striatella-unipunctata	2	0.03452	8	44	0	0	0	0	0	1	0	0	0	0	0	0	0	0	0	0	0	0	0	0	0	0	0	0	3	0	0	3	0	0
OTU621	Euk	SAR	Str	Ch	Ch	Ch_Spumella	EU787424	100	0.99	SAR	Str	Sy	Sy	Ma	Synura-americana	8	0.00078	8	44	0	0	0	0	0	0	2	0	0	1	0	0	0	0	0	0	0	0	0	0	0	0	0	0	0	0	0	0	0	0
OTU666	Euk	SAR	Str	Ba	Ba	Ba_Pinnularia	JN418587	100	0.95	SAR	Str	Ba	Ba	Ba	Pseudo-nitzschia-pseudodelicatissima	2	0.011	3	44	0	0	0	0	0	0	0	0	0	0	0	0	19	0	0	0	0	0	0	0	0	0	0	0	0	0	0	0	0	0
OTU446	Euk	SAR	Alv	Ci	In	Sp_Diophrys	JN172995	100	0.95	SAR	Alv	Ci	In	Sp	Diophryopsis-hystrix	2	0.10589	1	44	0	0	0	0	0	0	0	0	0	0	0	0	0	0	0	0	0	0	0	0	0	0	0	0	0	0	0	0	0	0
OTU682	Euk	SAR	Alv	Di	Gy	Po_Polykrikos	EU418966	100	0.99	SAR	Alv	Di	Pe	Am	Amphidiniopsis-rotundata	2	0.05773	21	43	0	0	0	0	0	0	0	0	0	0	0	0	0	0	0	0	2	2	1	0	1	0	0	1	1	5	0	0	0	0
OTU620	Euk	SAR	Str	Pe	Sa	Sa_Ankylochrysis	HQ710571	100	0.99	SAR	Str	Pe	Pe	Au	Aureococcus-anophagefferens	4	0.01337	16	43	0	0	0	0	0	0	0	0	0	0	0	0	2	1	0	0	0	0	0	0	1	0	0	0	2	2	5	0	0	0
OTU418	Euk	SAR	Alv	Ci	In	Ol_Paranophrys	FJ858379	100	1	SAR	Alv	Ci	In	Ol	Paranophrys-marina	2	0.00795	9	43	0	0	0	0	0	0	0	0	0	0	0	0	0	0	0	0	1	0	0	0	0	0	0	0	0	0	0	0	6	0
OTU482	Euk	SAR	Str	Ba	Ba	Ba_Pinnularia	AM743094	100	0.96	SAR	Str	Ba	Ba	Ba	Pinnularia-acrosphaeria	3	0.08683	6	43	0	0	1	0	0	0	0	0	0	0	0	0	0	0	0	0	0	35	0	0	4	0	0	0	0	0	0	0	0	0
OTU596	Euk	SAR	Alv	Ci	In	Ol_Durchoniella	FN999021	100	0.85	SAR	Alv	Ci	In	Sp	Parastrombidinopsis-shimi	3	0.29635	5	43	34	0	0	0	0	0	0	0	0	0	3	0	0	0	0	0	0	0	0	3	0	0	0	0	2	0	0	0	0	0
OTU586	Euk	SAR	Rhi	Ce	Ce	Ce_Cercomonas	KU926702	100	1	SAR	Rhi	Ce	Ce	Ce	Neocercomonas-sp	2	0.00017	2	43	0	0	0	0	0	0	0	0	0	0	0	0	0	0	0	0	0	0	0	0	0	0	0	0	0	0	0	0	42	1
OTU670	Euk	SAR	Str	Di	Pe	Ap_Apedinella	HQ710559	100	0.97	SAR	Str	Di	Rh	Rh	Rhizochromulina-cf	9	0.07165	28	42	0	0	0	0	0	2	0	3	0	2	0	0	1	2	0	1	0	1	2	1	0	1	0	1	0	0	0	0	0	0
OTU603	Euk	SAR	Str	Ba	Co	Th_Skeletonema	AJ632211	100	0.92	SAR	Rhi	Ce	Ce	He	Allantion-sp	6	0.08599	13	42	0	0	0	0	0	0	0	0	0	0	0	0	0	0	2	0	0	6	0	0	0	0	2	1	0	6	0	0	0	0
OTU660	Euk	SAR	Str	Ra	un	Ha_Haramonas	JX026932	100	0.91	SAR	Str	Ra	Ch	Ch	Heterosigma-akashiwo	4	0.19532	7	42	0	0	33	0	0	0	0	1	0	0	0	0	0	1	0	0	0	0	0	0	0	0	0	0	0	0	0	0	1	0
OTU618	Euk	SAR	Rhi	Ce	Pl	Pl_Phagomyxa	AF310903	100	0.98	SAR	Rhi	Ce	Pl	Pl	Spongospora-subterranea	6	0.07275	1	42	0	0	0	0	0	0	0	0	0	0	0	0	0	0	0	0	0	0	0	0	0	0	0	0	0	0	0	0	0	0
OTU604	Euk	SAR	Str	Sc		_Schizocladia	AB085614	100	0.84	SAR	Str	Ba	Co	Ch	Chaetoceros-debilis	3	0.36456	15	41	0	0	0	0	0	1	2	0	4	0	0	16	0	0	0	0	1	0	0	0	1	0	0	0	0	4	0	0	0	2
OTU711	Euk	SAR	Str	Ba	Me	Bi_Hemiaulus	KC309496	100	0.99	SAR	Str	Ba	Co	Rh	Proboscia-indica	8	0.08217	15	41	0	0	0	0	0	0	0	7	0	1	0	0	0	9	0	0	0	0	0	2	0	0	0	0	5	0	0	4	0	1
OTU629	Euk	SAR	Rhi	Ce	Im	Si_Sphenoderia	KF539409	100	0.94	SAR	Rhi	Ce	Ce	Ce	Massisteria-marina	5	0.13353	12	41	0	0	0	0	0	0	0	0	0	0	0	0	0	0	5	0	3	0	0	0	0	0	0	0	6	0	0	0	0	0
OTU580	Euk	SAR	Alv	Di	Sy	Am_Amoebophrya	AY775284	100	0.89	SAR	Alv	Di	Sy	Am	Amoebophrya-sp	12	0.24724	10	41	0	0	0	0	2	0	0	0	0	0	2	0	0	0	0	0	0	0	0	0	1	0	0	0	0	0	0	0	0	0
OTU561	Euk	SAR	Rhi	Ce	Pl	Pl_Phagomyxa	AF310903	100	0.95	SAR	Rhi	Ce	Va	Le	Leptophryidae-sp	2	0.14229	4	41	0	0	0	0	35	0	0	0	0	0	0	0	0	0	0	0	0	0	3	0	0	0	0	0	0	0	0	0	0	0
OTU688	Euk	SAR	Alv	Ci	In	Sp_Parabirojimia	DQ503584	100	0.91	SAR	Alv	Ci	In	Sp	Protocruzia-contrax	6	0.21619	2	41	0	0	0	0	0	0	0	0	0	0	0	0	0	0	0	0	0	0	0	0	0	0	0	0	0	0	0	0	0	0
OTU594	Euk	SAR	Str	Ba	Co	Th_Thalassiosira	AM050629	100	0.98	SAR	Str	Ba	Co	Th	Thalassiosira-mala	23	0.07333	1	41	0	0	0	0	0	0	0	0	0	0	0	0	0	0	0	0	0	0	0	0	0	0	0	0	0	0	0	0	0	0
OTU496	Euk	SAR	Rhi	Ce	Im	Si_Euglypha	KT232134	100	0.94	SAR	Rhi	Ce	Gy		Gymnophrys-cometa	6	0.11579	17	40	0	0	1	0	1	0	0	0	12	0	0	0	0	2	0	3	0	0	2	0	4	0	0	0	1	0	0	0	0	0
OTU566	Euk	SAR	Alv	Ci	In	Ol_Apofrontonia	AM072621	100	0.91	SAR	Alv	Ci	In	Pr	Prorodon-viridis	9	0.08967	16	40	0	0	0	1	0	0	0	0	0	0	0	0	0	0	0	0	2	0	0	0	1	0	1	1	0	7	0	0	0	0
OTU635	Euk	SAR	Str	Ba	Co	Co_Corethron	KC309527	100	0.99	SAR	Str	Ba	Co	Co	Corethron-sp	8	0.04511	16	40	0	0	0	0	0	0	0	0	0	0	0	0	0	0	0	0	0	2	0	1	0	1	1	1	2	2	0	0	0	0
OTU575	Euk	SAR	Alv	Di	Sy	Am_Amoebophrya	AY775284	100	0.96	SAR	Alv	Di	Sy	Am	Amoebophrya-sp	11	0.07486	8	40	0	0	0	0	0	0	0	0	0	0	0	0	0	0	0	0	0	0	0	0	0	0	0	0	0	6	0	0	1	0
OTU676	Euk	SAR	Alv	Ci	In	Sp_Codonaria	JQ408202	100	0.99	SAR	Alv	Ci	In	Sp	Schmidingerella-quequenensis	5	0.03935	7	40	0	0	0	0	0	0	0	0	0	0	0	0	0	0	0	0	0	0	0	0	4	0	0	0	7	0	0	0	0	0
OTU659	Euk	SAR	Str	Oo	Py	Py_Halophytophthora	HQ161106	100	0.92	SAR	Str	Ba	Fr	Fr	Licmophora-grandis	4	0.06245	6	40	1	0	3	0	0	0	0	0	0	0	0	0	0	0	0	0	0	0	0	0	0	0	0	0	0	0	0	0	0	0
OTU701	Euk	SAR	Str	La	Th	La_Labyrinthuloides	AF265339	100	0.98	SAR	Str	La	La	La	Labyrinthula-sp	2	0.30425	5	40	0	0	0	0	0	0	0	0	0	0	0	0	4	0	0	0	0	0	0	0	0	0	0	0	0	0	0	0	0	0
OTU633	Euk	SAR	Str	Ba	Ba	Ba_Navicula	KT072983	100	0.99	SAR	Str	Ba	un		Bacillariophyta-sp	12	0.00075	1	40	0	0	0	0	0	0	40	0	0	0	0	0	0	0	0	0	0	0	0	0	0	0	0	0	0	0	0	0	0	0
OTU597	Euk	SAR	Str	Ba	Co	Ch_Chaetoceros	AB847415	100	0.93	SAR	Str	Ba	Fr	Fr	Licmophora-grandis	18	0.1389	21	39	0	1	0	0	0	3	0	2	0	0	0	1	0	0	0	2	0	0	0	2	0	2	0	6	0	0	0	3	0	1
OTU602	Euk	SAR	Alv	Di	Pr	Pr_Prorocentrum	DQ174089	100	0.98	SAR	Alv	Di	Pr	Pr	Prorocentrum-mexicanum	3	0.00547	9	39	0	0	0	0	0	0	0	0	0	0	0	0	0	1	0	0	0	0	0	0	0	0	0	0	4	0	0	3	0	2
OTU690	Euk	SAR	Rhi	Ce	Th	Ch_Capsellina	GQ377676	100	1	SAR	Rhi	Ce	Th	Ch	Rhogostoma-minus	2	0	7	39	0	0	0	1	0	0	6	0	0	0	0	0	1	0	0	0	1	0	0	0	0	1	0	0	0	0	20	0	0	0
OTU678	Euk	SAR	Alv	Ci	In	Ol_Miamiensis	JN885091	100	0.98	SAR	Alv	Ci	In	Ol	Parauronema-virginianum	2	0.07285	2	39	0	0	0	0	0	0	0	0	0	0	0	0	0	0	0	0	0	0	0	0	0	0	19	0	0	0	0	0	0	0
OTU696	Euk	SAR	Alv	Ci	In	Pr_Prorodon	KM222104	100	0.96	SAR	Alv	Ci	In	Pr	Prostomatea-sp	2	0.06186	1	39	0	0	0	0	0	0	0	0	0	0	0	0	0	0	0	0	0	0	0	0	0	0	0	0	0	0	0	0	0	0
OTU697	Euk	SAR	Rhi	Ce	Th	Tr_Trachyrhizium	LC125926	100	0.98	SAR	Rhi	Ce	Th	Tr	Trachyrhizium-urniformis	9	0.05808	1	39	0	0	0	0	0	0	0	0	0	0	0	0	0	0	0	0	0	0	0	0	0	0	0	0	0	0	0	0	0	0
OTU350	Euk	SAR	Rhi	Ce	Th	Le_Lecythium	KP728379	100	0.96	SAR	Rhi	Ce	Im	Si	Euglypha-tuberculata	4	0.215	14	38	0	0	0	0	0	0	0	0	0	0	0	0	0	0	0	0	0	0	0	1	0	0	0	0	0	0	0	0	0	0
OTU716	Euk	SAR	Str	Ba	Ba	Ba_Nitzschia	JF794052	100	0.99	SAR	Str	Ba	Co	Th	Thalassiosira-mala	14	0.05291	5	38	0	30	0	0	0	0	0	0	0	0	0	0	0	1	0	0	4	0	0	0	0	0	0	0	0	0	0	0	0	0
OTU577	Euk	SAR	Str	Ba	Me	Bi_Plagiogramma	KJ577867	100	0.96	SAR	Str	Ba	Fr	Fr	Licmophora-remulus	5	0.06529	21	37	0	1	0	0	0	2	0	2	0	3	0	0	0	2	0	0	0	0	1	0	0	0	0	0	0	0	0	2	0	1
OTU904	Euk	SAR	Alv	Di	Pe	He_Heterocapsa	KF925338	100	0.89	SAR	Alv	Di	Gy	Ka	Takayama-cf	3	0.13829	5	37	0	0	0	0	0	0	1	0	0	0	0	0	0	0	0	0	0	0	0	0	0	0	0	0	0	0	1	0	0	0
OTU694	Euk	SAR	Rhi	Ce	Ph	Ph_Conchariidae	AB998905	100	0.9	SAR	Rhi	Ce	Ph	Ph	Aulographis-japonica	2	0.27135	1	37	0	0	0	0	0	0	37	0	0	0	0	0	0	0	0	0	0	0	0	0	0	0	0	0	0	0	0	0	0	0
OTU619	Euk	SAR	Str	Ch	Ch	Di_Dinobryon	EF165141	100	0.95	SAR	Str	Ch	Hi	Hi	Chromophyton-rosanoffii	2	0.09753	8	36	0	0	0	0	0	0	0	0	0	0	0	0	0	0	18	0	0	0	0	0	0	0	0	0	0	0	0	0	0	0
OTU641	Euk	SAR	Alv	Di	Gy	Ka_Takayama	JF790995	100	0.93	SAR	Alv	Di	Gy	Ka	Takayama-cf	5	0.05757	8	36	0	0	0	0	5	0	0	0	0	0	0	0	0	0	0	0	0	0	0	0	0	0	0	0	0	8	4	0	0	0
OTU470	Euk	SAR	Rhi	Ce	As	Ha_Haplosporidian	AY449716	100	0.86	SAR	Rhi	Gr	Gr		Gromia-oviformis	3	0.21434	4	36	0	0	0	0	0	7	0	0	0	0	0	0	0	0	0	0	0	0	0	0	0	16	0	0	0	0	0	0	0	0
OTU667	Euk	SAR	Str	Ba	Fr	Fr_Hyalosira	FM164375	100	0.83	SAR	Str	Ba	Fr	Fr	Asterionella-glacialis	3	0.33114	4	36	0	0	0	0	0	0	0	0	0	0	0	0	0	0	0	0	0	0	0	0	0	0	0	0	0	11	0	0	0	0
OTU914	Euk	SAR	Str	Oo	Ol	Ol_Olpidiopsis	AB363063	100	0.95	SAR	Str	Ba	Fr	Fr	Licmophora-grandis	21	0.1389	23	35	0	0	0	0	0	3	1	1	0	0	1	3	0	3	1	2	0	0	1	2	0	0	1	0	0	0	3	1	1	1
OTU788	Euk	SAR	Str	Ba	Me	Bi_Hemiaulus	KC309496	100	0.97	SAR	Str	Ba	Co	Rh	Proboscia-indica	5	0.08847	20	35	0	0	3	1	0	3	0	0	0	0	0	0	0	1	2	0	0	1	0	1	0	0	1	1	0	0	0	2	1	0
OTU662	Euk	SAR	Str	Ba	Co	Ch_Chaetoceros	KT860959	100	0.95	SAR	Str	Ba	Ba	Ba	Luticola-sp	3	0.15867	18	35	0	1	1	0	0	0	0	4	0	0	0	2	0	0	0	3	0	0	0	2	0	3	0	0	1	0	0	0	0	1
OTU663	Euk	SAR	Rhi	Ce	Im	Ma_Abollifer	LC006124	100	0.96	SAR	Rhi	Ce	Im	Ma	Abollifer-globosa	4	0.06535	14	35	2	0	0	0	0	0	4	0	0	0	2	0	1	0	0	0	0	0	0	0	4	0	0	0	0	6	1	0	0	0
OTU691	Euk	SAR	Rhi	Ce	Im	Si_Sphenoderia	KF539409	100	0.93	SAR	Rhi	Ce	Im	Ma	Pseudopirsonia-mucosa	7	0.08384	5	35	0	0	0	0	0	0	0	0	0	0	0	0	0	0	0	0	0	0	0	0	12	0	0	0	0	0	0	0	0	0
OTU652	Euk	SAR	Alv	Di	Pe	Ox_Thecadinium	GU295204	100	0.82	SAR	Alv	Ap			Apicomplexa-sp	5	0.45867	1	35	0	0	0	0	0	0	0	0	0	0	0	0	0	0	0	0	0	0	35	0	0	0	0	0	0	0	0	0	0	0
OTU695	Euk	SAR	Alv	Ci	In	Ol_Homalogastra	EF158848	100	0.99	SAR	Alv	Ci	In	Ol	Entorhipidium-tenue	7	0.00073	1	35	0	0	0	0	0	0	0	0	0	0	0	0	0	0	0	0	0	0	0	0	0	0	0	0	0	0	0	0	0	0
OTU664	Euk	SAR	Rhi	Ce		_Marine	FJ410916	100	0.96	SAR	Rhi	Ce			Marine-flagellate	5	0.08035	10	34	0	0	0	0	8	0	2	0	6	0	0	0	2	0	0	0	3	0	0	0	2	0	0	0	0	0	0	0	0	0
OTU674	Euk	SAR	Str	Oo	Sa	Sa_Aquastella	KF294791	100	0.91	SAR	Str	Ba	Co	Rh	Proboscia-indica	3	0.17999	9	34	0	0	0	0	0	0	0	0	0	1	0	0	1	0	0	9	0	0	0	0	0	0	0	0	0	1	0	0	16	0
OTU824	Euk	SAR	Str	Ch	Ch	Di_Dinobryon	EU025007	100	0.98	SAR	Str	Ch	Ch	Ch	Chrysosaccus-sp	3	0.03021	5	34	30	0	0	0	0	0	0	0	0	0	0	0	0	0	0	0	0	0	0	0	0	0	0	0	0	0	0	0	0	0
OTU693	Euk	SAR	Str	Ba	Ba	Ba_Pinnularia	JN418571	100	0.9	SAR	Rhi	Ac	Sy	Am	Amphibelone-cultellata	5	0.19325	1	34	34	0	0	0	0	0	0	0	0	0	0	0	0	0	0	0	0	0	0	0	0	0	0	0	0	0	0	0	0	0
OTU447	Euk	SAR	Alv	Co	un	_Colpodellidae	GQ411073	100	0.86	SAR	Alv	Ap			Apicomplexa-sp	4	0.37263	1	34	0	0	0	0	0	0	0	34	0	0	0	0	0	0	0	0	0	0	0	0	0	0	0	0	0	0	0	0	0	0
OTU722	Euk	SAR	Str	Ba	Me	Bi_Orizaformis	KR048192	100	0.97	SAR	Str	Ba	Co	Co	Ellerbeckia-sp	8	0.12683	1	34	0	0	0	0	0	0	0	0	0	0	0	0	0	0	0	0	0	0	0	0	0	0	0	0	0	0	0	0	0	0
OTU583	Euk	SAR	Alv	Ci	In	Sp_Euplotes	KJ434107	100	0.99	SAR	Alv	Ci	In	Sp	Euplotes-petzi	2	0.00295	1	34	0	0	0	0	0	0	0	0	0	0	0	0	0	0	0	0	0	0	0	0	0	0	0	0	0	0	0	0	0	0
OTU679	Euk	SAR	Str	Ba	Co	Co_Corethron	KC309527	100	0.99	SAR	Str	Ba	Co	Co	Corethron-sp	7	0.04516	15	33	0	0	1	0	0	0	0	6	0	1	0	2	0	0	0	2	0	0	0	0	0	0	0	0	0	0	0	1	0	0
OTU699	Euk	SAR	Str	Di	Fl	_Pseudochattonella	AM850218	100	0.99	SAR	Str	Di	Fl		Pseudochattonella-farcimen	4	0.03994	14	33	0	0	0	0	0	0	0	0	0	0	0	0	0	0	0	0	0	4	0	0	4	0	3	1	0	3	0	0	0	0
OTU820	Euk	SAR	Alv	Ci	In	Sp_Strongylidium	KC153532	100	0.99	SAR	Alv	Ci	In	Sp	Halteria-sp	4	0.0055	10	33	0	0	0	0	0	0	0	0	0	0	0	1	0	0	0	0	0	0	0	0	2	0	0	0	0	0	0	0	0	0
OTU542	Euk	SAR	Str	Oo	My	Eu_Eurychasma	AB368176	100	0.99	SAR	Str	PX	Xa	Mi	Botryidiopsidaceae-sp	3	0.00071	3	33	0	0	0	0	0	0	0	0	0	0	0	2	0	0	0	0	0	0	0	0	0	0	0	0	0	0	0	0	0	16
OTU692	Euk	SAR	Alv	Ci	In	Co_Pseudoplatyophrya	AF060452	100	1	SAR	Alv	Ci	In	Co	Pseudoplatyophrya-nana	2	0.00461	3	33	0	0	0	0	0	0	0	0	0	0	0	0	0	0	0	0	0	0	0	0	0	0	0	0	0	0	0	0	30	0
OTU857	Euk	SAR	Alv	Di	Gy	To_Tovellia	KU359052	100	1	SAR	Alv	Di	Gy	To	Tovellia-cf	2	0.04154	2	33	0	0	0	0	1	0	0	0	0	0	0	0	0	0	0	0	0	0	0	0	0	0	0	0	0	0	0	0	0	0
OTU658	Euk	SAR	Alv	Ci	In	Ol_Cohnilembus	HM236339	100	0.98	SAR	Alv	Ci	In	Ol	Entorhipidium-tenue	10	0.00073	1	33	0	0	0	0	0	0	0	0	0	0	0	0	0	0	0	0	0	0	0	0	0	0	0	0	0	0	0	0	0	0
OTU581	Euk	SAR	Str	Ba	Ba	Ba_Epithemia	HQ912409	100	0.97	SAR	Str	Ba	Co	Ch	Tenuicylindrus-belgicus	7	0.07295	11	32	0	0	0	0	0	0	0	0	0	0	1	0	4	0	0	0	0	0	0	0	0	0	0	0	0	2	1	0	7	0
OTU766	Euk	SAR	Str	Ba	Ba	Ba_Nitzschia	JQ582669	100	0.96	SAR	Str	Ba	Co	Th	Thalassiosira-mala	10	0.05292	7	32	0	0	0	0	0	0	0	0	2	0	0	0	0	0	0	0	0	0	0	0	11	0	0	0	0	0	0	0	0	0
OTU740	Euk	SAR	Str	Ba	Ba	Ba_Navicula	KT072983	100	0.98	SAR	Str	Ba	Ba	Ba	Navicula-tripunctata	2	0.06413	4	32	0	0	0	0	0	0	0	0	0	0	0	0	0	0	0	0	0	0	0	0	0	0	0	0	0	0	0	0	0	0
OTU702	Euk	SAR	Str	Ba	Ba	Ba_Frustulia	HF562297	100	0.93	SAR	Str	Ca			Cantina-marsupialis	4	0.12484	3	32	0	0	0	0	0	0	0	0	0	0	0	0	0	0	0	0	0	0	0	0	0	0	0	0	0	0	0	0	0	0
OTU624	Euk	SAR	Alv	Ci	In	Ol_Miamiensis	JN885091	100	0.98	SAR	Alv	Ci	In	Ol	Metanophrys-sinensis	2	0.08062	2	32	28	0	0	0	0	0	0	0	0	0	0	0	0	0	0	0	0	0	0	0	0	0	0	0	0	0	0	0	0	0
OTU423	Euk	SAR	Alv	Ci	In	Li_Pseudoholophrya	KT246085	100	0.97	SAR	Alv	Ci	In	Li	Apobryophyllum-schmidingeri	3	0.09382	2	32	0	0	3	0	0	0	0	0	0	0	0	0	0	0	0	0	0	0	0	0	0	0	0	0	0	0	0	0	0	0
OTU806	Euk	SAR	Alv	Ci	In	Li_Litonotus	GQ351701	100	0.89	SAR	Alv	Ci	In	Li	Kentrophyllum-sp	2	0.21273	1	32	0	0	0	32	0	0	0	0	0	0	0	0	0	0	0	0	0	0	0	0	0	0	0	0	0	0	0	0	0	0
OTU713	Euk	SAR	Rhi	Ce	Im	Si_Protaspis	FJ824125	100	0.94	SAR	Rhi	Ce	Th	Ch	Rhogostoma-minus	5	0.22002	1	32	0	0	0	0	0	0	0	0	0	0	0	0	0	0	0	0	0	0	0	0	0	0	0	0	0	0	0	0	0	0
OTU698	Euk	SAR	Str	Di	Pe	Pt_Pteridomonas	AB081640	100	0.93	SAR	Str	Di	Rh	Rh	Rhizochromulina-cf	8	0.20861	19	31	0	0	0	0	0	0	0	0	0	0	0	0	0	2	0	1	0	0	0	2	0	4	0	0	1	0	0	1	2	0
OTU990	Euk	SAR	Str	Di	Fl	un_Florenciellales	AB518483	100	0.99	SAR	Str	Ba	Ba	Ba	Pinnularia-acrosphaeria	7	0.0472	17	31	0	0	0	0	1	0	0	0	0	0	0	0	0	0	0	0	0	1	1	0	0	0	0	0	0	0	5	0	0	0
OTU710	Euk	SAR	Rhi	Ce	Re	_Reticulamoeba	KC109672	100	0.85	SAR	Rhi	Ce	Ce	Sa	Sainouron-acronematica	3	0.29513	10	31	0	0	0	0	5	1	0	0	0	0	0	0	0	0	0	0	0	0	0	5	0	0	0	0	0	0	0	0	2	0
OTU386	Euk	SAR	Str	PX	Xa	Tr_Tribonema	HQ710588	100	0.96	SAR	Str	Bi	Ca	Ca	Cafeteria-roenbergensis	3	0.17743	5	31	0	0	0	0	0	0	0	0	0	0	0	0	0	0	0	0	8	0	0	0	0	0	0	0	0	0	0	0	0	0
OTU758	Euk	SAR	Alv	Ci	In	Ol_Cothurnia	KU363275	100	0.99	SAR	Alv	Ci	In	Ol	Cothurnia-sp	2	0.01749	4	31	0	0	0	5	0	0	0	0	0	0	0	0	0	0	0	0	0	0	0	0	0	0	0	0	0	0	0	0	0	0
OTU642	Euk	SAR	Str	Ba	Co	Th_Conticribra	DQ514869	100	0.98	SAR	Str	Ba	Co	Th	Thalassiosira-sp	2	0.07831	4	31	0	0	0	0	0	0	0	0	0	0	0	0	0	0	0	0	0	0	0	2	0	0	0	0	0	0	0	0	0	0
OTU683	Euk	SAR	Rhi	Ce	Im	Si_Protaspis	FJ824125	100	0.98	SAR	Rhi	Ce	Th	Ch	Rhogostoma-minus	3	0.08696	3	31	0	0	0	0	1	0	0	0	0	0	0	0	0	0	0	0	0	0	0	0	0	0	0	0	0	0	0	0	0	0
OTU706	Euk	SAR	Str	Ba	Ba	Ba_Navicula	KT072983	100	0.97	SAR	Str	Ba	un		Bacillariophyta-sp	6	0.07956	3	31	0	0	0	0	0	0	0	8	0	0	0	0	0	0	0	0	0	0	0	0	0	0	0	0	8	0	0	0	0	0
OTU937	Euk	SAR	Str	Ba	Fr	Fr_Licmophora	HQ997923	100	0.94	SAR	Str	Ba	Me	Bi	Psammoneis-obaidii	3	0.10446	2	31	0	0	22	0	0	0	0	0	0	0	0	0	0	0	0	0	0	0	0	0	0	0	0	0	0	0	0	0	0	0
OTU717	Euk	SAR	Alv	Ci	In	Sp_Uncinata	KP717083	100	0.96	SAR	Alv	Ci	In	Sp	Holosticha-heterofoissneri	2	0.05399	1	31	0	0	0	0	0	0	0	0	31	0	0	0	0	0	0	0	0	0	0	0	0	0	0	0	0	0	0	0	0	0
OTU639	Euk	SAR	Alv	Ci	In	Sp_Strombidium	KJ737432	100	0.96	SAR	Alv	Ci	In	Sp	Strombidium-paracalkinsi	3	0.04297	1	31	0	0	0	0	0	0	0	0	0	0	0	0	0	0	0	0	0	0	0	0	0	0	0	0	0	0	0	0	0	0
OTU647	Euk	SAR	Rhi	Ce	Im	Si_Thaumatomastigidae	KC243117	100	0.97	SAR	Rhi	Ce	Im	Si	Thaumatomonas-sp	4	0.00147	1	31	0	0	0	0	0	0	0	0	0	0	0	0	0	0	0	0	0	0	0	0	0	0	0	0	0	0	0	0	0	0
OTU626	Euk	SAR	Alv	Ci	Po	He_Condylostoma	AM295496	100	0.97	SAR	Alv	Ci	Po	He	Condylostoma-spatiosum	2	0.04078	1	31	0	0	0	0	0	0	0	0	0	0	0	0	0	0	0	0	0	0	0	0	0	0	0	0	0	0	0	0	0	0
OTU874	Euk	SAR	Str	Ba	Co	Th_Thalassiosira	KU352756	100	0.97	SAR	Str	Di	Rh	Rh	Rhizochromulina-cf	2	0.12937	21	30	0	0	0	0	0	0	0	4	0	1	1	0	0	0	0	0	0	2	0	0	1	0	0	1	1	0	0	0	1	0
OTU685	Euk	SAR	Str	Ba	Co	Ch_Leptocylindrus	KC309538	100	0.96	SAR	Str	Ba	Co	Ch	Leptocylindrus-danicus	4	0.15183	17	30	0	0	0	0	0	0	0	8	1	0	0	1	0	2	0	0	0	0	0	0	0	0	0	0	0	0	0	0	1	1
OTU651	Euk	SAR	Str	Ba	Co	Rh_Rhizosolenia	JQ315687	100	0.95	SAR	Str	Ba	Co	Co	Coscinodiscus-wailesii	4	0.08582	9	30	0	0	0	0	0	1	0	0	0	0	0	0	0	1	0	1	0	0	0	1	0	0	0	1	0	0	0	0	0	0
OTU841	Euk	SAR	Rhi	Ce	Ce	Ce_Paracercomonas	FJ790727	100	0.97	SAR	Rhi	Ce	Ce	Ce	Paracercomonas-astra	3	0.02571	8	30	0	0	0	0	0	0	0	6	0	0	0	0	0	1	0	0	0	0	0	0	0	0	0	0	0	0	0	0	0	0
OTU164	Euk	SAR	Rhi	Ce	Im	Ma_Abollifer	LC006124	100	0.96	SAR	Rhi	Ce	Im	Ma	Abollifer-globosa	7	0.06388	7	30	0	0	7	0	0	0	0	0	0	9	0	0	0	0	0	0	0	0	0	0	0	0	0	0	0	0	0	0	0	0
OTU627	Euk	SAR	Rhi	Ce	Im	Si_Euglypha	AJ418786	100	0.91	SAR	Rhi	Ce	Im	Si	Trachelocorythion-pulchellum	3	0.18427	4	30	0	0	0	0	0	0	0	0	0	0	0	0	0	0	0	0	21	0	0	0	0	0	0	0	0	0	0	0	0	0
OTU760	Euk	SAR	Rhi	Ce	Ce	Ce_Massisteria	KM065452	100	0.95	SAR	Str	Ba	Co	Ch	Tenuicylindrus-belgicus	6	0.10561	3	30	0	0	0	0	0	0	0	0	0	0	0	0	0	0	0	0	0	0	0	0	0	0	0	0	1	0	0	0	0	0
OTU814	Euk	SAR	Alv	Di	un	Ps_Psammosa	JN873311	100	0.92	SAR	Alv	Co	Co		Colpodella-pontica	3	0.16017	1	30	0	0	0	0	0	0	0	0	0	0	0	0	0	0	0	0	0	0	0	0	0	0	0	0	0	0	0	0	0	0
OTU737	Euk	SAR	Str	Ba	Fr	Fr_Ulnaria	KF959659	100	0.96	SAR	Str	Ba	Fr	Fr	Licmophora-remulus	10	0.08592	18	29	0	0	0	0	0	2	0	0	0	0	0	0	0	2	0	1	0	0	0	0	0	1	0	1	1	0	0	1	0	2
OTU774	Euk	SAR	Str	Ba	Me	Bi_Orizaformis	KR048192	100	0.99	SAR	Str	Ba	Co	Ch	Chaetoceros-muellerii	4	0.0632	17	29	0	3	1	0	0	1	0	2	0	1	0	0	0	3	0	1	0	0	0	0	0	0	0	1	0	0	0	0	0	1
OTU1155	Euk	SAR	Str	Di	Di	Vi_Vicicitus	HQ646558	100	0.98	SAR	Str	Pe	Pe	Au	Aureococcus-anophagefferens	6	0.05237	16	29	0	0	2	0	3	0	0	0	0	0	0	0	2	0	0	0	0	0	0	0	1	0	0	0	0	0	0	0	3	0
OTU686	Euk	SAR	Alv	Ci	In	Sp_Eutintinnus	JN831767	100	0.84	SAR	Alv	Ci	In	Sp	Notohymena-apoaustralis	2	0.41907	16	29	0	0	1	0	0	1	0	1	0	0	0	0	0	0	0	0	0	0	0	3	0	1	0	7	3	0	0	1	0	2
OTU622	Euk	SAR	Str	Ba	Ba	Ba_Navicula	KT072983	100	0.97	SAR	Str	Ba	Co	Rh	Proboscia-indica	4	0.10753	15	29	0	0	0	0	1	0	0	0	0	0	0	0	2	0	0	0	0	1	0	0	1	0	0	0	0	0	0	0	0	0
OTU753	Euk	SAR	Rhi	Ce	Im	Si_Protaspis	FJ824122	100	0.96	SAR	Rhi	Ce	Th	Ch	Rhogostoma-minus	10	0.1255	13	29	0	2	0	0	0	0	0	5	0	0	0	0	0	0	3	0	0	0	0	1	2	0	3	0	0	0	0	2	0	0
OTU355	Euk	SAR	Rhi	Ce	Va	Va_Vampyrellida	KC779517	100	0.91	SAR	Rhi	Ce	Va	Le	Leptophryidae-sp	5	0.21767	5	29	0	0	0	0	2	0	0	0	0	0	0	0	0	0	0	0	0	0	0	0	0	0	0	0	0	0	19	0	0	0
OTU779	Euk	SAR	Rhi	Ce	Pl	Pl_Phagomyxa	AF310903	100	0.95	SAR	Rhi	Ce	Pl	Pl	Spongospora-subterranea	5	0.12081	1	29	0	0	0	0	0	0	0	0	0	0	0	0	0	0	0	0	0	0	0	0	0	0	0	0	0	0	0	0	0	0
OTU885	Euk	SAR	Str	Di	Pe	Ci_Ciliophrys	AB081641	100	0.97	SAR	Str	Di	Pe	Ci	Ciliophrys-infusionum	5	0.03236	1	29	0	0	0	0	0	0	0	0	0	0	0	0	0	0	0	0	0	0	0	0	0	0	0	0	0	0	0	0	0	0
OTU730	Euk	SAR	Str	Di	Pe	Ap_Apedinella	HQ710559	100	0.96	SAR	Str	Di	Rh	Rh	Rhizochromulina-cf	4	0.114	1	29	0	0	0	0	0	0	0	0	0	0	0	0	0	0	0	0	0	0	0	0	0	0	0	0	0	0	0	0	0	0
OTU903	Euk	SAR	Str	Pe	Pe	Pe_Pelagomonas	KT861109	100	0.91	SAR	Alv	Ac			Acavomonas-peruviana	5	0.09428	1	29	0	0	0	0	0	0	0	0	0	0	0	0	0	0	0	0	0	0	0	0	0	0	0	0	0	0	0	0	0	0
OTU720	Euk	SAR	Str	Ba	Co	Th_Thalassiosira	HM991701	100	0.92	SAR	Str	Ba	Ba	Ba	Amphora-commutata	3	0.02475	18	28	0	0	0	0	1	2	0	2	0	0	0	0	0	0	0	0	0	0	0	0	1	2	1	1	1	0	0	1	0	0
OTU749	Euk	SAR	Alv	Ci	In	Pr_Pelagothrix	AB486009	100	0.95	SAR	Alv	Ci	In	Pr	Prorodon-viridis	8	0.13338	16	28	0	0	0	0	0	1	0	1	0	0	0	2	0	1	0	0	0	0	2	0	0	0	0	1	1	0	0	2	0	0
OTU687	Euk	SAR	Rhi	Ce		_Cercozoan	DQ666485	100	0.9	SAR	Rhi	Ce	Th	Tr	Trachyrhizium-urniformis	8	0.1261	8	28	0	0	0	0	0	0	0	0	0	14	0	0	0	1	0	5	0	0	0	0	0	0	0	0	0	0	0	1	0	0
OTU381	Euk	SAR	Rhi	Ce	Ce	Ce_Cercomonas	FJ790697	100	0.96	SAR	Rhi	Ce	As	Ha	Haplosporidium-tuxtlensis	4	0.63794	7	28	0	0	0	0	1	0	0	0	1	0	0	0	0	0	0	0	0	0	0	0	0	0	0	0	0	0	0	0	10	0
OTU793	Euk	SAR	Alv	Di	Sy	Am_Amoebophrya	AY775284	100	0.89	SAR	Alv	Di	Sy	Am	Amoebophrya-sp	9	0.21428	6	28	0	0	0	0	0	0	0	0	0	0	0	0	10	0	0	0	0	3	0	0	0	0	0	0	0	0	1	0	0	0
OTU746	Euk	SAR	Rhi	un		_Rhizaria	KM401881	100	0.81	SAR	Rhi	Ce	Va	Va	Penardia-sp	8	0.41054	5	28	0	0	0	0	0	0	0	0	0	0	0	0	0	1	0	0	0	0	0	0	0	0	0	0	0	0	0	0	0	0
OTU508	Euk	SAR	Alv	Ac		_Acavomonas	KF651077	100	0.94	SAR	Rhi	Ce	Th		Mataza-hastifera	12	0.09506	4	28	0	0	0	0	0	0	0	0	0	0	0	0	0	0	0	0	0	0	0	0	0	0	0	8	0	7	0	0	0	0
OTU864	Euk	SAR	Str	Ba	Co	Th_Thalassiosira	HM991693	100	0.97	SAR	Str	Ba	Co	Th	Skeletonema-menzellii	3	0.05018	3	28	0	0	0	0	0	0	0	0	0	0	0	0	0	0	0	0	0	0	0	0	0	9	0	0	0	0	0	0	0	14
OTU765	Euk	SAR	Rhi	Ce	Ce	Ce_Paracercomonas	HM536161	100	0.85	SAR	Str	Bi	Bi	Sy	Symbiomonas-scintillans	2	0.66219	1	28	0	0	0	0	0	0	0	0	0	0	0	0	0	0	0	0	0	0	0	0	28	0	0	0	0	0	0	0	0	0
OTU724	Euk	SAR	Str	Sy	Pa	Tr_Triparma	KR998401	100	0.99	SAR	Str	Ba	Ba	Ba	Diploneis-subovalis	5	0.03375	1	28	0	0	0	0	0	0	0	0	0	0	0	0	0	0	0	0	0	0	0	0	0	0	0	0	0	0	0	0	0	0
OTU750	Euk	SAR	Str	Ba	Co	Ch_Chaetoceros	KT860958	100	0.98	SAR	Str	Ba	Co	Ch	Chaetoceros-radicans	6	0.11192	18	27	0	0	1	0	0	0	1	2	1	1	0	0	0	0	0	0	1	0	0	0	0	1	1	0	0	0	0	3	0	0
OTU787	Euk	SAR	Str	Ba	Co	Ch_Chaetoceros	AB430592	100	0.97	SAR	Str	Ba	Co	Ch	Chaetoceros-radicans	6	0.12352	11	27	0	0	0	0	0	0	0	0	0	0	0	0	0	0	0	1	0	0	3	0	0	0	3	2	6	0	0	0	0	0
OTU646	Euk	SAR	Alv	Co	Co	_Colponema	KJ598081	100	0.93	SAR	Alv	Co	Co		Colponema-vietnamica	3	0.07623	6	27	2	0	0	11	0	0	0	0	1	0	0	0	0	0	0	0	0	0	0	0	0	0	0	0	0	0	3	0	0	0
OTU718	Euk	SAR	Rhi	Ce	Im	Si_Euglypha	AJ418782	100	0.86	SAR	Str	Bi	Ca	Ca	Cafeteria-roenbergensis	3	0.4577	5	27	0	0	0	0	0	0	1	0	0	0	0	0	0	0	0	0	0	0	0	1	0	6	0	0	0	0	0	0	0	0
OTU736	Euk	SAR	Alv	Co	Co	_Colponema	KJ598081	100	0.94	SAR	Str	Ba	Co	Ch	Tenuicylindrus-belgicus	3	0.08049	4	27	0	0	0	0	0	0	0	0	0	0	0	0	8	0	0	0	0	0	0	0	0	0	0	0	0	0	0	0	0	0
OTU707	Euk	SAR	Str	Bi	Bi	Bi_Bicosoeca	AY520445	100	0.97	SAR	Str	Bi	Bi	Bi	Bicosoeca-kenaiensis	2	0.07024	4	27	0	0	0	0	0	0	0	0	0	0	0	0	0	2	0	0	0	0	0	0	0	0	0	0	0	0	0	0	0	0
OTU932	Euk	SAR	Str	La	Th	Ob_Oblongichytrium	AB973534	100	0.99	SAR	Str	La	Th	Sc	Schizochytrium-minutum	2	0.02953	4	27	0	0	0	0	0	0	0	0	0	0	0	0	0	0	2	0	0	0	0	0	0	0	0	0	0	0	0	0	0	0
OTU898	Euk	SAR	Str	Ba	Ba	Ba_Pinnularia	AM743094	100	0.95	SAR	Rhi	Ce	Im	Si	Esquamula-lacrimiformis	3	0.05198	3	27	0	0	0	20	0	0	0	0	0	0	0	0	0	0	0	0	0	0	0	0	0	0	0	0	0	0	0	0	0	0
OTU860	Euk	SAR	Str	Ba	Co	Ch_Chaetoceros	EU090012	100	1	SAR	Str	Ba	Co	Ch	Chaetoceros-neogracilis	3	0.01745	2	27	0	0	23	0	0	0	0	0	0	0	0	0	0	0	0	0	4	0	0	0	0	0	0	0	0	0	0	0	0	0
OTU755	Euk	SAR	Str	Oo	Sa	Sa_Aquastella	KF294791	100	0.88	SAR	Str	Sy	Oc	Oc	Poterioochromonas-malhamensis	2	0.23796	2	27	0	0	0	0	0	23	0	0	0	0	0	0	0	0	0	0	0	0	0	0	0	0	0	0	0	0	0	0	0	0
OTU882	Euk	SAR	Alv	Di	Pe	He_Heterocapsa	KF925338	100	0.96	SAR	Alv	Di	Pe	He	Heterocapsa-arctica	4	0.10737	18	26	0	0	0	0	0	2	0	0	1	0	0	0	0	1	0	1	0	0	0	0	0	0	0	0	0	1	0	2	0	1
OTU961	Euk	SAR	Str	Ba	Fr	Fr_Ctenophora	HQ912611	100	0.98	SAR	Str	Ba	Co	Co	Ellerbeckia-sp	7	0.09807	17	26	0	0	0	0	0	1	0	0	0	0	0	1	0	2	0	1	0	0	0	0	1	1	1	1	1	0	1	0	0	0
OTU984	Euk	SAR	Str	Di	Pe	Ps_Pseudopedinella	HQ710560	100	0.96	SAR	Str	Di	Pe	Ps	Pseudopedinella-sp	3	0.09858	14	26	0	0	0	2	0	0	0	0	0	0	0	0	1	0	0	0	0	1	0	0	0	0	0	0	0	0	3	0	3	0
OTU917	Euk	SAR	Str	PX	Xa	Mi_Chlorellidium	FJ030892	100	0.98	SAR	Str	Di	Di	Vi	Vicicitus-globosus	5	0.04063	13	26	0	0	0	0	0	0	0	0	0	0	0	1	3	0	1	0	2	0	0	0	2	0	0	0	0	0	0	0	0	0
OTU756	Euk	SAR	Alv	Ci	In	Sp_Spirostrombidium	KM222098	100	0.92	SAR	Alv	Ci	In	Sp	Pseudotontonia-simplicidens	4	0.18943	11	26	0	0	0	0	0	0	0	0	0	0	0	0	0	0	0	0	1	2	0	0	3	0	0	0	2	7	0	0	0	0
OTU783	Euk	SAR	Alv	Di	Pr	Pr_Prorocentrum	Y16237	100	0.98	SAR	Alv	Di	Go	Am	Amphidiniella-sedentaria	2	0.05185	1	26	26	0	0	0	0	0	0	0	0	0	0	0	0	0	0	0	0	0	0	0	0	0	0	0	0	0	0	0	0	0
OTU795	Euk	SAR	Alv	Ci	In	Sp_Helicostomella	AB640639	100	0.99	SAR	Alv	Ci	In	Sp	Parundella-sp	6	0.05433	12	25	0	0	0	0	0	0	0	5	0	0	2	0	0	0	0	0	0	0	0	1	0	0	0	1	2	0	0	0	0	1
OTU599	Euk	SAR	Rhi	Ce	Ce	un_Nucleocercomonas	HM536166	100	0.94	SAR	Rhi	Ce	Ce	Ce	Paracercomonas-astra	4	0.06909	10	25	0	6	1	0	0	0	0	0	1	0	0	0	0	0	1	0	0	0	0	0	0	0	0	0	0	0	0	0	0	0
OTU439	Euk	SAR	Rhi	Ce	Th	Le_Lecythium	KP728379	100	0.98	SAR	Rhi	Ce	Ce	Ce	Cercomonas-alexieffi	5	0.00162	9	25	0	0	9	0	2	0	0	0	0	0	0	0	0	0	0	0	1	0	0	0	0	0	0	0	0	5	0	0	0	0
OTU744	Euk	SAR	Rhi	Ce	Th	Le_Lecythium	KP728379	100	0.96	SAR	Rhi	Ce	Im	Si	Peregrinia-clavideferens	2	0.1243	9	25	0	0	0	0	0	0	0	0	2	0	0	0	0	0	0	0	0	0	1	0	0	1	0	0	0	0	0	0	0	0
OTU825	Euk	SAR	Alv	Ci	In	Sp_Strombidiidae	EU024994	100	1	SAR	Alv	Ci	In	Sp	Strombidiidae-sp	2	0.01938	8	25	9	0	8	0	0	0	0	0	0	0	0	0	0	0	0	0	0	0	0	0	0	1	0	0	0	0	0	0	0	0
OTU811	Euk	SAR	Alv	Ci	In	Sp_Parastrombidinopsis	AJ786648	100	0.99	SAR	Alv	Ci	In	Sp	Parastrombidinopsis-shimi	3	0.04845	8	25	0	0	0	0	0	0	0	0	0	0	0	0	0	0	0	1	0	0	0	0	0	0	4	0	0	0	0	0	0	0
OTU681	Euk	SAR	Alv	Ci	un	_Ciliate	AM412525	100	0.94	SAR	Alv	Ci	un		Ciliate-sp	4	0.09001	8	25	0	0	0	0	0	0	0	0	0	0	0	1	0	0	0	0	0	0	0	0	0	0	0	0	0	0	0	0	0	0
OTU715	Euk	SAR	Alv	Ci	In	Li_Askenasia	EU024989	100	0.96	SAR	Alv	Ci	In	Li	Cyclotrichium-cyclokaryon	4	0.1021	8	25	0	0	0	0	0	0	0	0	0	0	0	0	0	0	0	0	0	5	0	0	0	0	4	7	0	3	0	0	0	0
OTU763	Euk	SAR	Rhi	Ce	Im	Si_Sphenoderia	KF539409	100	0.95	SAR	Rhi	Ce	Im	Si	Sphenoderia-macrolepis	4	0.06359	7	25	0	0	0	0	0	0	0	0	0	0	0	0	0	0	0	0	0	0	0	0	0	0	0	0	2	3	0	0	0	0
OTU655	Euk	SAR	Rhi	Ce	Th	Le_Lecythium	KP728379	100	0.96	SAR	Rhi	Ce	De	Cl	Clathrulina-elegans	5	0.1301	6	25	0	0	6	1	0	0	0	11	0	0	5	0	0	0	0	0	0	0	0	0	0	0	0	0	0	0	0	0	0	0
OTU1038	Euk	SAR	Rhi	Ce	Th	Le_Lecythium	KP728379	100	0.99	SAR	Rhi	Ce	Ce	Ce	Cercomonas-agilis	2	0.05668	6	25	0	0	13	0	0	0	0	0	0	0	0	0	1	0	0	0	0	0	0	0	0	0	0	0	0	0	0	0	0	0
OTU830	Euk	SAR	Alv	Ci	In	Sp_Pelagostrobilidium	JQ781699	100	0.98	SAR	Alv	Ci	In	Sp	Pelagostrobilidium-sp	2	0.02636	5	25	0	0	0	7	0	0	0	0	0	0	4	9	0	0	0	0	0	0	0	0	0	0	0	0	0	0	0	0	0	0
OTU782	Euk	SAR	Str	Ch	Ch	Ch_Spumella	EU787424	100	0.92	SAR	Str	Ba	Co	Ch	Attheya-sp	3	0.08189	4	25	22	0	0	0	0	0	0	0	0	0	0	0	0	0	0	0	0	0	0	0	0	0	0	0	0	0	1	0	0	0
OTU738	Euk	SAR	Alv	Ci	In	Sp_Strombidium	KP260510	100	0.96	SAR	Alv	Ci	In	Sp	Strombidium-capitatum	7	0.12982	4	25	0	0	0	0	0	0	0	0	0	0	0	0	0	0	0	0	0	19	0	0	0	0	1	0	0	0	0	0	0	0
OTU636	Euk	SAR	Rhi	Ce	Im	Si_Assulina	EF456749	100	0.88	SAR	Rhi	Ce	Im	Ma	Pseudopirsonia-mucosa	6	0.25743	4	25	0	0	0	0	0	0	0	0	0	0	0	0	0	0	0	0	0	0	0	0	0	0	0	0	0	0	0	0	0	0
OTU772	Euk	SAR	Alv	Di	Sy	Am_Amoebophrya	AY775284	100	0.94	SAR	Alv	Di	Sy	Am	Amoebophrya-sp	10	0.13602	2	25	24	0	0	0	0	0	0	0	0	0	0	0	0	0	0	0	0	0	0	0	0	0	0	0	0	0	0	0	0	0
OTU859	Euk	SAR	Str	Di	Pe	Pt_Pteridomonas	KM516203	100	0.99	SAR	Str	Di	Pe	Pt	Pteridomonas-danica	3	0.00907	2	25	24	0	0	0	0	0	0	0	0	0	0	0	0	0	0	0	0	0	0	0	0	0	0	0	0	0	0	0	0	0
OTU893	Euk	SAR	Alv	Ci	In	Pr_Pelagothrix	AB486009	100	0.88	SAR	Alv	Ci	In	Na	Discotricha-papillifera	4	0.47537	2	25	0	0	0	0	0	0	0	0	0	0	0	0	0	0	0	0	0	0	0	0	0	0	0	0	0	18	0	0	0	0
OTU800	Euk	SAR	Alv	Ci	In	Na_Zosterodasys	FJ008926	100	0.97	SAR	Alv	Ci	In	Na	Orthodonella-sp	2	0.02568	1	25	0	0	0	0	0	0	0	0	0	0	0	0	0	0	0	0	0	0	0	0	0	0	0	0	0	0	0	0	0	0
OTU831	Euk	SAR	Str	Ba	Me	Cy_Extubocellulus	AY485504	100	0.94	SAR	Str	Ba	Fr	Fr	Licmophora-remulus	14	0.08809	16	24	0	0	0	0	0	0	0	2	0	0	0	1	0	1	0	0	0	0	0	1	0	0	0	0	1	0	0	1	0	0
OTU794	Euk	SAR	Alv	Ci	In	Sp_Strombidium	KP260513	100	0.98	SAR	Alv	Ci	In	Sp	Laboea-strobila	3	0.08056	15	24	1	0	0	2	0	0	0	0	0	0	0	0	0	0	1	0	1	0	0	0	0	0	2	2	0	0	3	0	1	0
OTU742	Euk	SAR	Alv	Ci	In	Sp_Strombidium	KP260513	100	0.98	SAR	Alv	Ci	In	Sp	Strombidium-caudispina	5	0.05587	15	24	0	0	0	0	0	1	0	1	0	0	0	0	0	2	0	0	0	0	0	0	0	0	0	4	2	1	1	3	0	0
OTU851	Euk	SAR	Str	Ba	Fr	Fr_Ulnaria	KF959659	100	0.99	SAR	Str	Ba	Co	Ch	Chaetoceros-decipiens	3	0.04203	14	24	0	0	0	0	0	3	0	0	0	0	0	0	0	1	0	0	0	0	0	4	0	1	0	1	0	0	0	1	0	0
OTU833	Euk	SAR	Str	Ph	Ph	Ph_Phaeothamnion	AM490832	100	0.93	SAR	Rhi	Ce			Marine-flagellate	6	0.12063	6	24	0	0	0	0	0	0	1	0	0	0	0	0	0	0	0	0	0	0	0	0	0	0	0	0	0	0	0	0	0	0
OTU852	Euk	SAR	Rhi	Ce	Ce	Ce_Paracercomonas	FJ790724	100	0.96	SAR	Rhi	Ce	Ce	Ce	Paracercomonas-oxoniensis	6	0.06316	3	24	0	0	0	0	0	0	0	0	0	0	0	0	6	0	0	0	0	0	0	0	0	0	0	0	0	0	0	0	0	0
OTU799	Euk	SAR	Rhi	Ce	Th	Ps_Pseudodifflugia	AJ418794	100	0.94	SAR	Rhi	Ce	Im	Si	Peregrinia-clavideferens	4	0.02688	2	24	0	0	0	0	0	0	0	0	0	0	0	0	0	0	0	0	0	0	0	0	0	0	0	0	0	0	0	0	0	0
OTU838	Euk	SAR	Str	PX	Xa	Mi_Chlorellidium	FJ030892	100	0.95	SAR	Str	Ba	Me	Bi	Trigonium-formosum	2	0.1679	1	24	0	0	0	0	0	0	0	0	0	0	0	0	0	0	0	0	0	0	0	0	0	0	0	24	0	0	0	0	0	0
OTU759	47r									SAR	Str	Ba	Ba	Ba	Sellaphora-sp	3	0.61698	1	24	0	0	0	0	0	0	0	0	0	0	0	0	0	0	0	0	0	0	0	0	0	0	0	0	0	0	0	0	0	0
OTU723	Euk	SAR	Str	Ba	Co	Th_Thalassiosira	KU352756	100	0.99	SAR	Str	Ba	Co	Th	Thalassiosira-anguste-lineata	5	0.14723	1	24	0	0	0	0	0	0	0	0	0	0	0	0	0	0	0	0	0	0	0	0	0	0	0	0	0	0	0	0	0	0
OTU856	Euk	SAR	Str	Bi	un	Ha_Halocafeteria	KT210055	100	0.88	SAR	Str	Ba	Fr	Fr	Licmophora-grandis	3	0.3667	15	23	0	0	0	0	0	0	0	0	0	0	0	0	0	2	0	1	0	1	0	0	1	0	0	0	0	0	0	0	0	0
OTU850	Euk	SAR	Str	Ba	Ba	Ba_Planothidium	KF417664	100	0.99	SAR	Str	Ba	Me	Bi	Dimeregramma-sp	4	0.00106	14	23	4	0	0	5	0	0	0	0	0	0	0	0	0	2	0	0	0	0	0	0	1	0	0	0	1	2	0	0	0	0
OTU819	Euk	SAR	Str	Ch	Ch	Ch_Ochromonas	EF165136	100	0.99	SAR	Str	Di	Di	Vi	Vicicitus-globosus	3	0.00081	9	23	0	0	0	0	0	0	0	0	0	0	0	0	0	0	0	0	3	0	0	0	0	0	9	0	0	0	1	0	0	0
OTU767	Euk	SAR	Alv	Ci	In	Ol_Cyclidium	KF256817	100	0.81	SAR	Rhi	Ce	Im	Si	Thaumatomonas-sp	3	0.21389	9	23	0	0	0	0	1	0	0	0	0	0	0	0	0	0	2	0	0	0	0	0	8	0	0	1	1	1	0	0	0	0
OTU949	Euk	SAR	Str	Ba	Ba	Ba_Luticola	KM224123	100	0.91	SAR	Str	Ba	Co	Ch	Chaetoceros-debilis	3	0.28481	9	23	0	0	0	0	0	0	0	0	0	0	0	0	0	0	0	0	0	3	0	0	2	0	0	0	0	4	0	0	0	0
OTU909	Euk	SAR	Str	Di	Fl	un_Florenciellales	AB518483	100	0.99	SAR	Str	Ba	Ba	Ba	Amphora-coffeiformis	2	0.04925	6	23	0	0	0	0	0	0	4	0	0	0	0	0	0	0	0	0	2	0	0	0	11	0	0	0	0	0	0	0	0	0
OTU380	Euk	SAR	Alv	Ci	In	Sp_Apokeronopsis	JF718645	100	1	SAR	Alv	Ci	In	Sp	Thigmokeronopsis-stoecki	2	0.00257	5	23	0	0	0	0	0	2	0	0	0	0	0	0	0	0	0	0	0	0	0	0	0	0	0	0	0	0	0	0	0	0
OTU776	Euk	SAR	Rhi	Ce	Ce	Ce_Cercomonas	FJ790689	100	0.86	SAR	Rhi	Ce	Ce	Ce	Eocercomonas-echina	2	0.2897	3	23	0	0	0	0	0	0	0	0	0	0	0	0	0	0	0	0	0	0	0	0	0	0	0	0	0	10	0	0	0	0
OTU745	Euk	SAR	Alv	Ci	In	Sp_Urospinula	KF411460	100	0.99	SAR	Alv	Ci	In	Sp	Protogastrostyla-pulchra	4	0.04465	2	23	0	0	0	0	16	0	0	0	0	0	0	0	0	0	0	0	0	0	0	0	0	0	0	0	0	0	0	0	0	0
OTU1018	Euk	SAR	Alv	un		_Rana	EF675616	100	0.94	SAR	Alv	Co	Co		Colpodella-pontica	3	0.07308	2	23	0	0	0	0	0	0	0	0	0	0	0	0	0	0	0	0	0	0	0	0	0	0	0	0	0	0	0	0	0	0
OTU769	Euk	SAR	Str	La	Th	Ob_Oblongichytrium	AB973534	100	0.93	SAR	Str	Ba	Ba	Ba	Planothidium-frequentissimum	2	0.10793	1	23	0	0	0	0	0	0	0	0	0	0	0	0	0	0	0	0	0	0	0	0	0	0	0	0	0	0	0	0	0	23
OTU890	Euk	SAR	Rhi	Ce	Th	Tr_Trachyrhizium	LC125926	100	0.94	SAR	Str	Pe	un		Pelagophyceae-sp	3	0.08892	1	23	0	0	0	0	0	0	0	0	0	0	0	0	0	0	0	0	0	0	0	0	0	0	0	0	0	0	0	0	0	0
OTU784	Euk	SAR	Str	Ba	Me	Bi_Plagiogramma	KJ577867	100	0.95	SAR	Str	Ba	Fr	Fr	Licmophora-remulus	4	0.10737	13	22	0	0	0	0	0	1	0	1	0	2	0	2	0	0	0	0	0	0	0	3	0	2	0	0	0	0	0	0	0	3
OTU1122	Euk	SAR	Str	Di	Di	Vi_Vicicitus	HQ646558	100	0.94	SAR	Str	Ba	Ba	Ba	Pinnularia-acrosphaeria	7	0.10773	12	22	0	0	0	1	2	0	0	0	0	0	0	0	0	0	3	0	0	0	0	0	0	0	0	0	0	0	0	0	2	1
OTU901	Euk	SAR	Str	Oo	My	Eu_Eurychasma	AB368176	100	0.93	SAR	Str	Ba	Fr	Fr	Licmophora-grandis	12	0.1389	12	22	0	0	0	0	0	0	0	1	0	2	0	1	0	1	0	0	0	0	0	1	0	1	0	0	0	0	0	2	0	0
OTU875	Euk	SAR	Alv	Ci	In	Sp_Strombidium	KP260513	100	0.97	SAR	Alv	Ci	In	Sp	Strombidium-caudispina	6	0.09675	11	22	1	0	0	0	0	3	0	0	1	0	2	0	0	0	1	1	0	0	0	0	0	0	0	2	0	0	8	1	0	0
OTU828	Euk	SAR	Str	Ba	Me	Bi_Terpsinoe	KJ577872	100	0.97	SAR	Str	Ba	Co	Ch	Chaetoceros-radicans	12	0.13161	10	22	0	0	0	0	0	0	0	5	0	0	0	0	0	0	0	0	0	0	0	0	0	1	0	0	2	0	0	0	0	0
OTU836	Euk	SAR	Str	Ba	Fr	Fr_Ulnaria	KF959659	100	0.99	SAR	Str	Ba	Ba	Ba	Amphipleuraceae-sp	4	0.03361	9	22	0	0	0	0	0	0	0	0	0	1	0	0	0	1	0	0	0	0	0	0	0	0	6	2	1	0	0	0	0	0
OTU700	Euk	SAR	Alv	Ci	In	Sp_Strombidinopsis	FJ790209	100	0.99	SAR	Alv	Ci	In	Sp	Strombidinopsis-acuminata	4	0.04133	8	22	0	0	0	0	0	0	0	0	0	0	0	0	0	0	0	0	0	3	1	1	0	0	0	0	0	0	0	0	0	0
OTU822	Euk	SAR	Rhi	Ce	Im	Si_Sphenoderia	KF539410	100	0.92	SAR	Rhi	Ce	Im	Ma	Pseudopirsonia-mucosa	4	0.10431	7	22	0	0	8	0	0	0	0	0	0	0	0	0	0	0	1	1	0	0	0	1	0	0	0	0	0	0	0	0	0	0
OTU584	Euk	SAR	Alv	Di	Pe	Pe_Peridinium	EF492509	100	0.99	SAR	Alv	Di	Gy	Ka	Karlodinium-veneficum	2	0.01566	6	22	0	0	0	0	1	0	0	0	2	0	1	0	0	0	0	0	0	0	0	1	0	0	0	0	0	0	0	0	0	0
OTU888	Euk	SAR	Str	PX	Xa	Tr_Tribonema	HQ710588	100	0.94	SAR	Str	Ba	Ba	Ba	Frustulia-aotearoa	6	0.11699	2	22	0	19	0	0	0	0	0	0	0	0	0	0	0	0	0	0	0	0	0	0	0	0	0	0	3	0	0	0	0	0
OTU732	Euk	SAR	Rhi	Ce	Im	Si_Sphenoderia	KF539411	100	0.96	SAR	Rhi	Gr	Gr		Gromia-oviformis	3	0.10514	2	22	0	0	0	0	0	0	0	0	0	0	0	0	0	0	0	0	0	0	0	0	0	0	0	0	0	0	0	0	0	0
OTU944	Euk	SAR	Str	Sy	Sy	_Synchroma	JN004145	100	0.81	SAR	Str	La	un		labyrinthulid-quahog	2	0.75191	1	22	0	0	0	22	0	0	0	0	0	0	0	0	0	0	0	0	0	0	0	0	0	0	0	0	0	0	0	0	0	0
OTU778	Euk	SAR	Str	Ba	Co	Ch_Chaetoceros	AB430592	100	0.99	SAR	Str	Ba	Co	Ch	Chaetoceros-radicans	5	0.06193	1	22	0	0	0	0	0	0	0	0	0	0	0	0	0	0	0	0	0	0	0	0	0	0	0	0	0	0	0	0	0	0
OTU785	Euk	SAR	Str	Pe	Pe	Pe_Pelagomonas	KT861109	100	0.97	SAR	Str	Pe	Pe	Au	Aureococcus-anophagefferens	5	0.09413	13	21	0	0	0	0	0	1	0	0	1	0	0	0	0	0	0	0	0	0	0	2	0	2	0	0	0	0	0	0	2	0
OTU843	Euk	SAR	Str	Di	Pe	un_Pedinellales	JF794054	100	0.97	SAR	Str	Di	Pe	un	Pedinellales-sp	5	0.08429	12	21	0	0	0	0	0	1	0	3	0	0	1	4	0	0	0	0	0	0	0	0	0	1	0	0	0	0	0	0	0	1
OTU827	Euk	SAR	Str	Ba	Co	Ch_Chaetoceros	AB430592	100	0.97	SAR	Str	Ba	Co	Ch	Chaetoceros-radicans	4	0.12361	9	21	0	0	0	0	0	0	0	5	0	0	0	0	0	2	0	0	0	0	0	1	0	1	0	1	3	0	0	0	0	0
OTU967	Euk	SAR	Str	So		_Solenicola	HM163290	100	0.94	SAR	Str	So			Solenicola-setigera	3	0.06748	8	21	0	0	0	0	0	0	0	0	0	0	0	0	0	0	0	0	0	5	0	0	1	0	0	0	0	2	0	0	0	0
OTU813	Euk	SAR	Alv	Ci	In	Sp_Tintinnopsis	AB640668	100	0.99	SAR	Alv	Ci	In	Sp	Codonellopsis-morchella	6	0.06152	8	21	0	0	0	0	0	0	0	0	0	0	0	0	0	0	0	0	0	0	0	0	0	0	0	3	0	0	0	0	0	0
OTU807	Euk	SAR	Rhi	Ce	Im	Nu_Nudifila	HQ121434	100	0.91	SAR	Rhi	Ce	Im	Ma	Pseudopirsonia-mucosa	6	0.13028	6	21	0	0	0	0	0	0	0	0	0	0	0	0	0	0	0	0	0	0	0	0	0	0	0	0	0	0	0	0	2	0
OTU812	Euk	SAR	Alv	Di	Gy	Gy_Amphidinium	AF274254	100	0.99	SAR	Alv	Di	Pe	Pe	Peridinium-bipes	2	0.00139	5	21	0	0	2	0	0	0	0	0	0	0	0	0	0	0	14	0	0	0	0	0	0	0	0	0	0	0	0	0	0	0
OTU938	Euk	SAR	Str	La	Th	Ap_Aplanochytrium	AJ519935	100	0.97	SAR	Str	Ba	Ba	Ba	Entomoneis-sp	3	0.04235	5	21	0	0	1	0	0	0	0	0	0	0	0	0	0	0	0	0	0	0	0	0	0	0	0	0	3	0	0	0	1	0
OTU372	Euk	SAR	Str	Ba	Ba	Ba_Epithemia	HQ912409	100	0.94	SAR	Rhi	Ce	Ce	Ce	Massisteria-sp	7	0.11548	5	21	0	0	0	0	0	0	0	0	0	0	0	0	0	0	1	0	1	0	0	0	0	0	0	0	0	5	0	0	0	0
OTU921	Euk	SAR	Rhi	Ce	Th	Le_Lecythium	KP728379	100	0.99	SAR	Rhi	Ce	Ce	Ce	Cercomonas-alexieffi	5	0.00162	5	21	0	0	0	0	0	0	0	0	0	0	0	0	0	0	0	0	0	0	0	0	0	0	0	0	2	0	0	0	0	0
OTU453	Euk	SAR	Str	Ba	Me	Bi_Plagiogramma	KJ577867	100	0.97	SAR	Str	Ba	Fr	Fr	Licmophora-remulus	6	0.02536	3	21	2	0	0	0	0	0	0	0	0	0	0	0	0	0	0	0	0	0	0	0	0	0	0	0	0	0	0	4	0	0
OTU1005	Euk	SAR	Rhi	Ce	Th	Le_Lecythium	KP728379	100	0.98	SAR	Rhi	Ce	Re	un	Reticulamoeba-sp	6	0.18293	3	21	0	0	0	0	0	0	0	0	0	0	0	0	0	0	0	0	0	0	0	0	0	0	0	12	0	0	0	0	0	0
OTU839	Euk	SAR	Alv	Ci	In	Sp_Amphisiella	KU594636	100	0.95	SAR	Alv	Ci	In	Sp	Tachysoma-pellionellum	2	0.08192	2	21	0	0	0	0	0	0	0	0	0	0	0	0	0	0	0	0	0	0	0	0	0	0	0	0	0	0	13	0	8	0
OTU809	37r									SAR	Rhi	Ce	Pl	Pl	Spongospora-subterranea	4	0.22205	1	21	0	0	0	0	0	0	0	0	0	0	0	0	0	0	0	0	0	0	0	0	0	0	0	0	0	0	0	0	0	0
OTU878	Euk	SAR	Alv	Ci	In	Sp_Stenosemella	AB640648	100	0.96	SAR	Alv	Ci	In	Sp	Stenosemella-nivalis	4	0.10733	13	20	0	0	1	0	0	0	0	1	0	0	0	1	0	1	0	0	0	0	0	0	0	0	0	0	0	0	0	1	0	0
OTU1366	Euk	SAR	Str	Ba	Me	Bi_Hemiaulus	KC309496	100	0.97	SAR	Str	Ba	Co	Ch	Chaetoceros-radicans	9	0.11192	11	20	0	0	0	0	0	0	0	3	0	0	0	2	0	0	0	0	0	0	0	1	0	0	0	3	1	0	0	2	0	0
OTU810	Euk	SAR	Alv	Ci	In	Sp_Strombidium	KJ737432	100	0.93	SAR	Alv	Ci	In	Sp	Strombidium-capitatum	15	0.18253	11	20	0	0	0	0	0	0	0	0	0	0	0	0	0	0	0	4	0	0	0	0	0	0	1	1	1	0	2	1	0	1
OTU853	Euk	SAR	Str	Ba	Me	Bi_Plagiogramma	KJ577867	100	0.99	SAR	Str	Ba	Co	Ch	Chaetoceros-muellerii	4	0.12167	11	20	0	0	0	0	0	0	0	0	0	0	0	0	0	0	0	1	0	0	1	0	0	1	3	0	1	2	0	0	0	0
OTU266	Euk	SAR	Alv	Ci	In	Sp_Stenosemella	AB640648	100	0.98	SAR	Alv	Ci	In	Sp	Stenosemella-nivalis	5	0.04488	8	20	0	0	0	0	0	0	0	0	0	0	0	2	0	0	0	0	0	1	0	0	0	1	5	0	2	0	0	0	0	0
OTU638	Euk	SAR	Rhi	Ce	Im	Si_Ovulinata	HQ121432	100	0.98	SAR	Rhi	Ce	Im	Si	Ovulinata-parva	3	0.09781	6	20	0	0	1	0	0	0	0	3	0	0	0	0	0	0	0	0	0	0	0	0	0	0	0	0	0	0	0	0	0	0
OTU590	Euk	SAR	Alv	Di	un	Ps_Psammosa	JN873311	100	1	SAR	Alv	Di	un	Ps	Psammosa-pacifica	2	0.00618	5	20	0	0	0	0	0	0	0	0	0	0	0	0	0	0	0	0	0	0	0	0	0	0	3	0	0	0	0	0	1	0
OTU780	43r									SAR	Str	Di	Di	Vi	Vicicitus-globosus	6	0.00081	3	20	0	0	0	0	0	0	0	0	1	0	0	0	0	0	0	0	1	0	0	0	0	0	0	0	0	0	0	0	0	0
OTU768	Euk	SAR	Str	Ra	Ch	Ch_Heterosigma	KP702878	100	0.91	SAR	Str	PX	Ph	Di	Lobospira-bicuspidata	2	0.16269	2	20	0	2	0	0	0	0	0	0	0	0	0	0	0	0	0	0	0	0	0	0	0	0	0	0	0	18	0	0	0	0
OTU973	Euk	SAR	Str	Ba	Fr	Fr_Hyalosira	EF423407	100	0.82	SAR	Alv	Ap	Co	Gr	Selenidium-orientale	2	1.07855	2	20	0	0	0	0	0	0	0	0	0	0	0	0	0	0	0	0	0	0	0	0	0	0	0	0	0	6	0	0	0	0
OTU873	Euk	SAR	Str	Bi	Ad	_Adriamonas	AF243501	100	0.96	SAR	Str	Bi	Ne		Nerada-mexicana	4	0.04147	1	20	20	0	0	0	0	0	0	0	0	0	0	0	0	0	0	0	0	0	0	0	0	0	0	0	0	0	0	0	0	0
OTU980	Euk	SAR	Str	Eu	un	_Eustigmatophyceae	KF757248	100	0.91	SAR	Str	Bi	Ad		Adriamonas-peritocrescens	3	0.23407	1	20	0	0	0	20	0	0	0	0	0	0	0	0	0	0	0	0	0	0	0	0	0	0	0	0	0	0	0	0	0	0
OTU992	Euk	SAR	Alv	Ap	Co	Gr_Lecudina	AY196706	100	0.9	SAR	Alv	Ap	Co	Gr	Lecudina-polymorpha	3	0.38949	1	20	0	0	0	0	0	0	0	0	0	0	0	0	0	0	0	0	0	0	0	0	0	0	0	0	0	0	0	0	0	0
OTU714	Euk	SAR	Rhi	Ce	Im	Si_Corythion	EF456751	100	0.92	SAR	Rhi	Ce	Ce	Ce	Massisteria-sp	4	0.17027	1	20	0	0	0	0	0	0	0	0	0	0	0	0	0	0	0	0	0	0	0	0	0	0	0	0	0	0	0	0	0	0
OTU889	Euk	SAR	Str	Ba	Ba	Ba_Navicula	KT072983	100	0.97	SAR	Str	Di	Pe	Pt	Pteridomonas-sp	2	0.13724	12	19	0	0	0	0	0	0	0	2	0	0	0	0	0	0	1	0	1	0	0	0	0	0	0	0	0	3	0	0	2	0
OTU837	Euk	SAR	Str	Ba	Co	Ch_Chaetoceros	JF794044	100	0.97	SAR	Str	Ba	Co	Ch	Chaetoceros-decipiens	3	0.04268	11	19	0	0	0	0	0	2	0	2	0	1	0	0	0	0	0	0	0	0	0	3	0	0	0	0	3	0	0	0	0	0
OTU848	Euk	SAR	Str	Ba	Co	Rh_Dactyliosolen	KC309491	100	1	SAR	Str	Ba	Co	Rh	Dactyliosolen-blavyanus	2	0.04428	5	19	0	0	0	0	0	5	0	0	0	4	0	0	0	0	0	0	0	0	0	0	0	0	0	0	0	0	0	3	0	0
OTU770	Euk	SAR	Alv	Ap	Co	Co_Cryptosporidium	DQ991389	100	0.88	SAR	Alv	Ap	Co	Co	Rhytidocystis-polygordiae	2	0.32408	4	19	0	0	2	0	0	0	0	0	0	0	0	0	0	0	0	0	0	0	0	0	0	0	0	0	0	0	0	0	0	0
OTU899	Euk	SAR	Str	La	Th	Ap_Aplanochytrium	KT901795	100	0.98	SAR	Str	La	Th	Ob	Oblongichytrium-sp	2	0.04105	4	19	0	0	0	0	0	0	0	0	0	0	0	0	0	0	0	0	0	0	0	0	0	0	0	0	0	0	0	0	0	0
OTU1046	Euk	SAR	Rhi	Ce	Im	Si_Placocista	EF456748	100	0.85	SAR	Str	La	La	La	Labyrinthula-zosterae	2	0.63772	3	19	0	0	9	0	0	0	0	0	6	0	0	0	0	0	0	0	0	0	0	0	0	0	0	0	0	0	0	0	0	0
OTU404	Euk	SAR	Str	Oo	Sa	Sa_Achlya	KP098380	100	0.98	SAR	Str	Oo	Sa	Sa	Leptolegnia-sp	4	0.0484	3	19	0	0	0	0	1	0	0	0	0	0	0	0	0	0	0	0	0	0	0	0	0	0	0	0	0	0	0	0	0	0
OTU989	Euk	SAR	Rhi	Ce	Gl	Al_Allapsa	AF411265	100	0.87	SAR	Rhi	Ce	Ce	He	Allantion-sp	5	0.28699	3	19	0	0	0	0	0	0	0	0	0	0	0	0	0	0	0	0	0	0	0	0	0	0	0	0	0	2	0	0	0	0
OTU445	Euk	SAR	Str	La	Th	Ap_Aplanochytrium	AJ519935	100	0.93	SAR	Str	Ca			Cantina-marsupialis	8	0.17599	2	19	0	1	0	0	0	0	0	0	0	0	0	0	0	0	0	0	0	0	0	0	0	0	0	0	0	0	0	0	0	0
OTU1036	Euk	SAR	Str	Oo	Sa	Sa_Leptolegnia	AJ238662	100	0.96	SAR	Str	Ba	Ba	Ba	Planothidium-sp	2	0.06714	2	19	0	0	0	10	0	0	0	0	0	0	9	0	0	0	0	0	0	0	0	0	0	0	0	0	0	0	0	0	0	0
OTU894	Euk	SAR	Alv	El	Th	_Thalassomyces	AY340591	100	0.8	SAR	Alv	Ap	Co	Gr	Selenidium-orientale	2	0.6016	2	19	0	0	0	0	0	0	0	0	0	0	0	0	0	0	0	0	0	0	0	0	0	0	0	0	0	0	0	11	8	0
OTU576	Euk	SAR	Rhi	Ce		_Auranticordis	EU484394	100	0.96	SAR	Rhi	Ce			Auranticordis-quadriverberis	6	0.0917	2	19	0	0	0	0	0	0	0	0	0	0	0	0	0	0	0	0	0	0	0	0	0	0	0	0	0	0	0	16	0	0
OTU1048	Euk	SAR	Str	Ba	Ba	Ba_Stauroneis	KM116116	100	0.99	SAR	Str	Ba	Ba	Ba	Fallacia-cf	2	0.03696	1	19	0	0	19	0	0	0	0	0	0	0	0	0	0	0	0	0	0	0	0	0	0	0	0	0	0	0	0	0	0	0
OTU834	Euk	SAR	Str	Di	Pe	Ap_Apedinella	HQ710559	100	1	SAR	Str	Di	Rh	Rh	Rhizochromulina-cf	10	0.00494	1	19	0	0	0	0	0	0	0	0	0	19	0	0	0	0	0	0	0	0	0	0	0	0	0	0	0	0	0	0	0	0
OTU1094	Euk	SAR	Alv	Di	Pr	Pr_Prorocentrum	HQ890882	100	0.84	SAR	Alv	Di	Sy	Am	Amoebophrya-sp	7	0.34281	1	19	0	0	0	0	0	0	0	0	0	0	0	0	0	0	0	0	0	0	0	0	0	0	0	0	0	0	0	0	0	0
OTU854	Euk	SAR	Rhi	Ce	Im	Si_Sphenoderia	KF539411	100	0.98	SAR	Rhi	Ce	Gy		Gymnophrys-sp	4	0.06157	11	18	0	0	0	0	0	0	0	0	0	0	0	0	0	0	0	0	0	2	0	0	0	0	2	1	0	0	0	0	0	0
OTU844	Euk	SAR	Str	Ba	Ba	Ba_Stauroneis	KM116116	100	0.98	SAR	Str	Ba	Fr	Fr	Plagiostriata-goreensis	2	0.08378	10	18	0	1	0	0	0	0	0	0	1	0	0	0	0	2	0	1	0	0	0	0	1	0	0	0	0	0	0	4	0	0
OTU798	Euk	SAR	Str	Ba	Co	Rh_Guinardia	KC309536	100	0.98	SAR	Str	Ba	Co	Co	Stictocyclus-stictodiscus	3	0.12024	10	18	0	0	1	0	0	0	0	0	0	0	0	0	0	0	0	0	0	0	2	0	0	0	0	2	0	0	0	0	0	0
OTU960	Euk	SAR	Str	Ch	Ch	Pa_Paraphysomonas	JQ967309	100	0.99	SAR	Str	Sy	Sy	Ma	Synura-americana	8	0.02034	8	18	0	0	0	0	0	0	0	2	0	0	0	0	0	0	0	0	0	0	0	0	0	0	0	0	0	0	7	0	0	0
OTU796	Euk	SAR	Str	Bi	Bi	Bi_Bicosoeca	KM816648	100	0.91	SAR	Alv	Di	Go	Go	Alexandrium-tamiyavanichi	2	0.36133	8	18	0	0	0	0	0	0	0	0	0	0	0	0	0	0	1	0	0	0	0	0	6	0	0	0	1	2	4	0	0	0
OTU648	Euk	SAR	Rhi	Ce	Im	Si_Euglypha	KT232134	100	0.96	SAR	Rhi	Ce	Im	Ma	Pseudopirsonia-mucosa	12	0.0601	7	18	0	0	0	0	0	0	0	0	0	0	4	7	0	0	0	0	0	0	0	0	0	0	0	0	0	0	0	2	0	0
OTU872	Euk	SAR	Rhi	Ce	Ce	He_Bodomorpha	AF411276	100	0.94	SAR	Rhi	Ce	Im	Si	Protaspis-obliqua	3	0.11507	6	18	0	4	0	0	0	0	0	0	0	0	0	0	0	0	0	0	0	0	0	0	3	0	0	0	0	0	2	1	0	6
OTU1030	Euk	SAR	Rhi	Ce	Im	Si_Euglypha	EF456755	100	0.91	SAR	Rhi	Ce	Gy		Gymnophrys-cometa	5	0.20864	6	18	0	0	0	0	0	1	1	9	0	0	0	0	0	0	0	0	0	0	0	0	0	0	0	0	1	0	0	2	0	0
OTU966	Euk	SAR	Rhi	Ce	Im	Ma_Pseudopirsonia	AJ561116	100	0.94	SAR	Rhi	Ce	Im	Ma	Pseudopirsonia-mucosa	13	0.05926	6	18	0	0	0	0	0	0	0	0	0	0	0	0	0	0	4	0	0	0	0	0	0	0	0	0	0	0	1	0	0	0
OTU986	Euk	SAR	Rhi	Ce	Th	Le_Lecythium	KP728379	100	0.94	SAR	Rhi	Ce	Im	Si	Protaspis-obliqua	4	0.09854	4	18	0	0	0	0	0	0	0	0	0	0	0	0	0	0	0	0	0	0	0	0	0	0	8	0	0	0	0	0	0	0
OTU731	Euk	SAR	Alv	Ci	In	Ol_Zoothamnium	DQ662855	100	1	SAR	Alv	Ci	In	Ol	Zoothamnium-alternans	2	0.00267	4	18	0	0	0	0	0	0	0	0	0	0	0	0	0	0	0	0	0	0	0	0	0	0	0	0	0	0	0	0	0	0
OTU847	Euk	SAR	Str	Ba	Co	Th_Thalassiosira	KC284713	100	0.95	SAR	Str	Ba	Co	Co	Aulacodiscus-oreganus	2	0.12625	3	18	0	0	0	0	0	1	0	15	0	0	0	0	0	0	0	0	0	0	0	0	0	0	0	0	0	0	0	0	0	0
OTU1166	Euk	SAR	Rhi	Ce	Im	Sp_Spongomonas	AY620252	100	0.9	SAR	Rhi	Ce	Im	Si	Peregrinia-clavideferens	3	0.29102	3	18	0	0	0	0	0	0	0	0	0	0	0	0	0	0	0	0	0	0	0	0	0	0	0	0	0	0	0	0	0	0
OTU424	Euk	SAR	Alv	Ci	In	Sp_Protocruzia	DQ190467	100	0.99	SAR	Alv	Ci	In	Sp	Protocruzia-contrax	2	0.00582	2	18	0	0	0	0	0	0	0	0	0	16	0	0	0	0	0	0	0	0	0	0	0	0	0	0	0	0	0	0	0	0
OTU919	Euk	SAR	Rhi	Ce		_Cercozoan	DQ666485	100	0.9	SAR	Rhi	Ce			Auranticordis-quadriverberis	5	0.13503	10	17	0	0	2	4	0	0	0	0	1	0	0	0	0	0	0	0	0	0	0	0	0	0	1	0	0	0	0	0	0	0
OTU1107	Euk	SAR	Str	Pe	Sa	Sa_Chrysoreinhardia	KF422611	100	0.89	SAR	Str	Ba	Co	Rh	Proboscia-indica	6	0.13228	10	17	0	0	0	0	0	0	1	0	0	0	2	0	0	0	1	0	0	2	0	0	0	0	0	0	0	0	1	0	3	0
OTU876	Euk	SAR	Str	Ba	Fr	Fr_Grammatophora	AF525656	100	1	SAR	Str	Ba	Fr	Fr	Grammatophora-gibberula	2	0.00151	7	17	0	0	0	0	0	0	0	3	0	0	0	0	0	0	0	0	0	0	0	0	0	0	0	0	0	0	0	0	0	0
OTU1091	Euk	SAR	Alv	Ci	In	Pr_Pelagothrix	AB486009	100	0.96	SAR	Alv	Ci	In	Pr	Prorodon-viridis	7	0.06699	7	17	0	0	0	0	0	0	0	0	0	0	0	0	0	0	0	0	0	0	0	0	1	0	0	0	0	0	0	0	0	0
OTU712	Euk	SAR	Rhi	Ce	Im	Si_Protaspis	FJ824125	100	0.98	SAR	Rhi	Ce	Im	Si	Protaspis-sp	9	0.00488	5	17	0	0	0	0	0	0	0	1	0	0	0	0	0	0	0	0	0	0	0	0	0	3	0	0	1	0	0	0	0	0
OTU1083	Euk	SAR	Alv	Ci	In	Sp_Strombidium	KJ737432	100	0.98	SAR	Alv	Ci	In	Sp	Pseudotontonia-simplicidens	3	0.07156	5	17	0	0	0	0	0	0	0	0	0	0	0	0	0	0	0	0	0	0	0	2	1	0	0	0	0	2	0	0	0	0
OTU906	Euk	SAR	Str	Ba	Co	Co_Corethron	KC309527	100	0.98	SAR	Str	Ba	Co	Co	Corethron-sp	6	0.06543	4	17	0	0	0	0	0	0	0	0	0	0	0	0	0	0	0	0	0	0	0	6	0	0	0	6	0	0	0	0	0	0
OTU930	Euk	SAR	Str	La	Th	La_Labyrinthuloides	AF265339	100	0.95	SAR	Str	Bi	Ca		Caecitellus-paraparvulus	4	0.25522	4	17	0	0	0	0	0	0	0	0	0	0	0	0	0	0	0	0	0	0	0	0	0	0	0	0	0	0	0	0	0	0
OTU1004	Euk	SAR	Str	Pi	Pi	Pi_Pinguiochrysis	HQ710580	100	0.92	SAR	Str	Ba	Ba	Ba	Amphora-commutata	6	0.10913	3	17	0	0	0	0	0	0	0	0	0	0	0	0	0	0	0	0	0	0	0	0	12	0	2	0	0	3	0	0	0	0
OTU375	Euk	SAR	Alv	Ci	In	Li_Loxophyllum	KC476181	100	1	SAR	Alv	Ci	In	Li	Hemiophrys-procera	2	0.00621	2	17	0	0	0	0	0	0	0	0	0	0	0	0	0	0	11	0	0	0	0	0	0	0	0	0	0	0	0	0	0	0
OTU1029	Euk	SAR	Alv	Ch		_Chromerida	DQ174732	100	0.92	SAR	Alv	Ap	Co	Gr	Lecudina-polymorpha	4	0.34783	1	17	0	0	17	0	0	0	0	0	0	0	0	0	0	0	0	0	0	0	0	0	0	0	0	0	0	0	0	0	0	0
OTU991	Euk	SAR	Rhi	Ce	Th	Eb_Ebria	DQ303923	100	0.98	SAR	Rhi	Ce	Th		Mataza-hastifera	13	0.09488	1	17	0	0	0	0	0	0	0	0	0	0	0	0	0	0	0	0	0	0	0	0	0	0	0	0	0	0	0	0	0	0
OTU866	Euk	SAR	Str	Ba	Ba	Ba_Nitzschia	KF417688	100	0.99	SAR	Str	Ba	Co	Th	Thalassiosira-mala	4	0.01418	1	17	0	0	0	0	0	0	0	0	0	0	0	0	0	0	0	0	0	0	0	0	0	0	0	0	0	0	0	0	0	0
OTU946	Euk	SAR	Str	Ba	Co	Th_Cyclotella	AY485499	100	0.91	SAR	Str	Ba	Ba	Ba	Amphora-commutata	7	0.08732	1	17	0	0	0	0	0	0	0	0	0	0	0	0	0	0	0	0	0	0	0	0	0	0	0	0	0	0	0	0	0	0
OTU896	Euk	SAR	Str	Ba	Co	Th_Thalassiosira	JF794045	100	0.97	SAR	Str	Sc			Schizocladia-ischiensis	3	0.09682	11	16	0	0	0	0	0	1	1	1	0	0	0	0	0	0	0	1	0	0	0	0	0	0	0	0	0	0	0	0	0	0
OTU1280	Euk	SAR	Str	Ba	Fr	Fr_Ctenophora	HQ912611	100	0.96	SAR	Str	Ba	Ba	Ba	Nitzschia-stellata	3	0.04311	10	16	0	0	0	0	1	4	0	0	1	0	0	0	0	0	0	2	0	0	0	0	0	2	0	0	1	0	0	0	0	0
OTU826	Euk	SAR	Str	Ba	Fr	Fr_Licmophora	AY633759	100	0.99	SAR	Str	Ba	Co	Ch	Chaetoceros-muellerii	6	0.12167	9	16	0	0	0	0	0	0	0	1	0	0	0	0	0	0	0	0	0	0	0	0	0	0	0	0	4	0	0	0	0	0
OTU440	Euk	SAR	Str	Oo	un	La_Lagenisma	KT273921	100	0.96	SAR	Str	PX	Xa	Mi	Botrydiopsis-alpina	2	0.10409	7	16	0	0	0	0	0	0	0	0	5	0	0	0	0	0	0	0	0	0	0	1	0	0	0	0	0	0	0	0	0	0
OTU448	Euk	SAR	Str	Ba	Co	Th_Porosira	AY485469	100	0.93	SAR	Str	Oo	Sa	Sa	Aplanes-treleaseanus	2	0.08861	5	16	0	0	0	0	3	0	0	0	1	0	0	0	0	0	0	0	0	0	0	0	0	0	0	0	0	0	0	0	0	0
OTU971	Euk	SAR	Alv	Ci	In	Ph_Dysteria	KC753493	100	0.85	SAR	Alv	Ci	In	Ph	Dysteria-cf	3	0.47681	5	16	0	0	0	0	0	0	0	0	0	0	0	0	0	0	0	0	0	0	2	0	3	0	0	0	0	2	0	0	0	0
OTU1074	Euk	SAR	Alv	Ci	In	Ol_Platynematum	KF301567	100	0.93	SAR	Alv	Ci	In	Ol	Hyalophysa-lwoffi	2	0.13923	3	16	0	0	0	0	0	0	6	0	0	0	0	0	0	0	0	0	0	0	0	0	0	0	0	0	0	0	0	0	0	0
OTU913	Euk	SAR	Str	Ba	Fr	Fr_Licmophora	AY633759	100	0.97	SAR	Str	Ba	Me	Bi	Dimeregramma-minor	2	0.042	2	16	0	0	0	0	0	15	0	0	0	0	0	0	0	0	0	0	0	0	0	0	0	0	0	0	0	0	0	0	0	0
OTU733	Euk	SAR	Rhi	Ce	Th	Tr_Trachyrhizium	LC125926	100	0.96	SAR	Rhi	Ce	Th	Tr	Trachyrhizium-urniformis	12	0.06971	2	16	0	0	0	0	0	0	0	0	0	0	0	0	0	0	0	0	0	0	0	0	0	0	0	0	0	0	0	0	0	0
OTU1058	Euk	SAR	Str	La	Th	Ap_Aplanochytrium	AJ519935	100	0.98	SAR	Str	La	La	La	Labyrinthula-sp	3	0.21201	1	16	0	0	0	0	0	0	0	0	0	0	0	0	0	16	0	0	0	0	0	0	0	0	0	0	0	0	0	0	0	0
OTU1001	Euk	SAR	Alv	Ci	In	Pr_Pelagothrix	AB486009	100	0.89	SAR	Alv	Ci	In	Ol	Entodiscus-borealis	4	0.1675	1	16	0	0	0	0	0	0	0	0	0	0	0	0	0	0	0	0	16	0	0	0	0	0	0	0	0	0	0	0	0	0
OTU920	Euk	SAR	Str	Ch	Ch	Ch_Chromulina	EF165101	100	0.89	SAR	Str	Ba	Ba	Ba	Nitzschia-frigida	3	0.21731	1	16	0	0	0	0	0	0	0	0	0	0	0	0	0	0	0	0	0	0	0	0	0	0	0	0	0	0	0	0	0	0
OTU939	Euk	SAR	Alv	Di	un	Pe_Pellucidodinium	LC027033	100	0.88	SAR	Alv	Di	Go	Go	Dapsilidinium-pastielsii	3	0.37865	1	16	0	0	0	0	0	0	0	0	0	0	0	0	0	0	0	0	0	0	0	0	0	0	0	0	0	0	0	0	0	0
OTU950	Euk	SAR	Str	Di	Di	Vi_Vicicitus	HQ646558	100	0.96	SAR	Str	Ba	Fr	Fr	Licmophora-grandis	14	0.1389	11	15	0	0	0	0	0	2	0	0	0	0	0	0	0	0	0	1	0	0	0	1	0	0	0	0	0	0	0	0	1	0
OTU1037	Euk	SAR	Alv	Ci	In	Sp_Strombidium	JF791016	100	0.97	SAR	Alv	Ci	In	Sp	Laboea-strobila	3	0.06321	10	15	0	0	1	0	0	0	0	0	0	0	2	0	0	0	0	0	2	0	0	0	0	0	0	0	1	2	1	0	0	0
OTU928	Euk	SAR	Alv	Ci	un	_Ciliate	AM412525	100	0.92	SAR	Alv	Ci	In	Pr	Prorodon-viridis	6	0.15531	9	15	0	2	0	0	1	0	0	0	0	0	0	2	0	2	0	0	0	0	1	0	0	0	0	0	0	0	0	0	0	1
OTU969	Euk	SAR	Alv	Di	Gy	Gy_Gyrodinium	AB120003	100	0.99	SAR	Alv	Di	Gy	Gy	Gyrodinium-rubrum	7	0.03976	9	15	0	0	0	0	0	0	0	0	0	0	0	0	0	0	0	0	0	0	2	0	1	0	0	1	1	2	0	0	0	0
OTU1104	Euk	SAR	Str	Di	Pe	Ap_Apedinella	HQ710559	100	0.95	SAR	Str	Di	Rh	Rh	Rhizochromulina-cf	6	0.18395	9	15	0	0	0	0	1	0	0	0	2	0	0	0	0	0	2	0	0	0	0	0	0	0	0	0	0	0	0	0	2	0
OTU1638	Euk	SAR	Str	Ba	Co	Ch_Chaetoceros	AB430592	100	0.96	SAR	Str	Ba	Co	Ch	Chaetoceros-radicans	7	0.19949	9	15	0	0	0	0	0	0	2	0	0	0	0	0	0	1	0	0	0	0	0	0	0	0	0	0	2	0	0	2	0	1
OTU1260	Euk	SAR	Rhi	Ce	Th	Ps_Pseudodifflugia	AJ418794	100	0.97	SAR	Rhi	Ce	Th	Ps	Pseudodifflugia-cf	3	0.04227	6	15	4	0	1	0	0	0	2	4	0	0	0	0	0	0	2	0	0	0	0	0	0	2	0	0	0	0	0	0	0	0
OTU634	Euk	SAR	Rhi	Ce	Th	Le_Lecythium	KP728379	100	0.98	SAR	Rhi	Ce	As	Ha	Haplosporidium-tuxtlensis	6	0.59726	6	15	0	0	0	0	1	0	0	0	2	0	0	0	0	0	0	0	0	0	0	0	0	0	0	0	0	0	0	0	0	0
OTU1339	Euk	SAR	Alv	Ci	In	Li_Chaenea	HM140393	100	0.98	SAR	Alv	Ci	In	Li	Chaenea-vorax	3	0.05915	5	15	0	0	0	0	0	0	0	4	3	0	0	0	0	0	0	0	0	0	0	0	0	0	0	0	0	0	6	0	0	0
OTU1026	Euk	SAR	Str	Oo	La	Ha_Haliphthoros	AB284573	100	0.91	SAR	Str	Ba	Ba	Ba	Pinnularia-acrosphaeria	5	0.25486	5	15	0	0	0	0	0	0	0	0	0	0	0	0	0	0	0	0	0	1	0	0	0	0	0	0	0	0	0	0	0	0
OTU1157	Euk	SAR	Rhi	Ce	Th	Cr_Cryothecomonas	AF290539	100	0.98	SAR	Rhi	Ce	Th	Cr	Cryothecomonas-aestivalis	3	0.07209	5	15	0	0	0	0	0	0	0	0	0	0	0	0	0	0	0	0	0	0	0	0	0	0	1	0	0	2	0	0	0	0
OTU978	Euk	SAR	Rhi	Ce	Th	Le_Lecythium	KP728379	100	0.96	SAR	Rhi	Ce	As	Ha	Haplosporidium-tuxtlensis	5	0.64146	3	15	0	0	0	0	0	7	0	0	0	0	0	0	0	0	0	0	0	0	0	0	0	0	0	0	0	0	0	0	0	2
OTU968	26r									SAR	Str	Ba	Co	Ch	Chaetoceros-radicans	3	1.56695	3	15	0	0	0	0	0	0	0	0	0	0	0	0	0	0	0	0	0	0	0	6	0	0	0	0	0	0	0	0	0	7
OTU1022	Euk	SAR	Alv	Ci	In	Co_Bursaria	EU039889	100	0.82	SAR	Alv	Ci	In	Na	Discotricha-papillifera	3	0.58305	3	15	0	0	0	0	0	0	0	0	0	0	0	0	0	0	0	0	0	0	0	0	0	0	0	0	0	0	0	0	0	0
OTU1200	Euk	SAR	Rhi	Ce	Im	Si_Thaumatomastix	GQ144681	100	0.96	SAR	Rhi	Ce	Im	Si	Euglypha-tuberculata	2	0.34185	3	15	0	0	0	0	0	0	0	0	0	0	0	0	0	0	0	0	0	0	0	0	0	0	0	0	0	0	0	0	0	0
OTU1021	Euk	SAR	Alv	Di	Sy	Am_Amoebophrya	AY775284	100	0.91	SAR	Alv	Di	Sy	Am	Amoebophrya-sp	6	0.21177	2	15	0	0	0	0	0	0	0	0	0	0	0	0	0	0	0	0	0	0	0	0	0	0	14	0	0	0	0	0	0	0
OTU1223	Euk	SAR	Rhi	Ce	Kr	_Kraken	KP940373	100	0.82	SAR	Str	Ba	Co	Co	Coscinodiscus-wailesii	5	0.36464	2	15	0	0	0	0	0	0	0	0	0	0	0	0	0	0	0	0	0	0	0	0	0	0	0	0	14	0	0	0	0	0
OTU910	Euk	SAR	Str	Bi	Ca	Ps_Pseudobodo	KT860979	100	0.84	SAR	Alv	Ap	Co	Gr	Ascogregarina-culicis	3	0.45804	1	15	0	0	0	0	0	0	0	0	0	15	0	0	0	0	0	0	0	0	0	0	0	0	0	0	0	0	0	0	0	0
OTU832	Euk	SAR	Rhi	Ce	Im	Si_Protaspis	FJ824125	100	0.94	SAR	Rhi	Ce	Th	Ch	Rhogostoma-minus	3	0.1288	1	15	0	0	0	0	0	0	0	0	0	0	0	0	0	0	0	0	0	0	15	0	0	0	0	0	0	0	0	0	0	0
OTU1066	Euk	SAR	Rhi	Ce	Pl	Pl_Spongospora	AF245217	100	0.89	SAR	Rhi	Ce	Pl	Pl	Spongospora-subterranea	3	0.43539	1	15	0	0	0	0	0	0	0	0	0	0	0	0	0	0	0	0	0	0	0	0	0	0	0	0	0	0	0	15	0	0
OTU1023	Euk	SAR	Alv	Di	Go	Cr_Crypthecodinium	AB871546	100	0.89	SAR	Alv	Ap	Co	Co	Cryptosporidium-parvum	2	0.20108	1	15	0	0	0	0	0	0	0	0	0	0	0	0	0	0	0	0	0	0	0	0	0	0	0	0	0	0	0	0	0	0
OTU565	87r									SAR	Str	Ba	Co	Co	Coscinodiscus-wailesii	5	0.60492	1	15	0	0	0	0	0	0	0	0	0	0	0	0	0	0	0	0	0	0	0	0	0	0	0	0	0	0	0	0	0	0
OTU933	Euk	SAR	Rhi	Ce	Im	Si_Sphenoderia	KF539409	100	0.91	SAR	Rhi	Ce	Im	Ma	Pseudopirsonia-mucosa	13	0.10667	1	15	0	0	0	0	0	0	0	0	0	0	0	0	0	0	0	0	0	0	0	0	0	0	0	0	0	0	0	0	0	0
OTU1742	Euk	SAR	Str	Oo	Ol	Ol_Olpidiopsis	AB363063	100	0.97	SAR	Str	Ch	Ch	Ch	Chrysowaernella-hieroglyphica	4	0.07582	10	14	0	0	0	0	0	0	0	0	0	0	2	0	0	0	0	0	0	0	0	0	0	0	0	1	0	2	0	0	2	0
OTU934	Euk	SAR	Alv	Di	Go	Am_Azadinium	JQ247707	100	0.88	SAR	Alv	Di	Gy	Ka	Takayama-cf	6	0.14733	10	14	0	0	0	0	0	0	0	0	1	1	0	0	0	0	0	0	1	0	0	0	0	0	0	0	0	0	0	0	0	0
OTU1154	Euk	SAR	Str	Di	Rh	Rh_Rhizochromulina	U14388	100	0.96	SAR	Str	Di	Rh	Rh	Rhizochromulina-cf	12	0.07165	9	14	0	0	0	0	0	0	0	0	0	0	1	0	1	2	0	0	0	0	0	0	0	0	0	3	0	0	0	0	3	0
OTU881	Euk	SAR	Alv	Di	Gy	Gy_Gyrodinium	AB120004	100	0.94	SAR	Alv	Di	Gy	Gy	Gyrodinium-rubrum	5	0.0818	9	14	0	0	0	0	0	0	0	0	0	0	0	0	0	0	0	0	0	0	1	0	2	0	0	1	1	4	0	0	0	0
OTU1006	Euk	SAR	Rhi	Ce	Im	Si_Protaspis	FJ824125	100	0.96	SAR	Rhi	Ce	Th	Ch	Rhogostoma-minus	9	0.18797	8	14	0	0	0	0	0	0	0	0	0	0	0	0	0	0	0	1	0	0	0	0	0	0	0	0	0	0	0	1	0	0
OTU546	Euk	SAR	Alv	Di	Pe	Di_Diplopsalis	KJ995958	100	0.99	SAR	Alv	Di	Pe	Di	Niea-acanthocysta	2	0.26506	7	14	0	0	0	0	0	0	0	0	0	6	0	0	0	1	0	0	0	0	0	0	0	0	0	0	1	0	0	0	0	0
OTU936	Euk	SAR	Str	Sy	Pa	Tr_Triparma	KR998401	100	0.98	SAR	Str	Ba	Co	Ch	Chaetoceros-muellerii	7	0.14229	7	14	0	0	0	0	0	0	0	0	0	0	0	0	0	0	0	0	0	0	0	0	0	0	0	0	0	1	0	0	0	0
OTU865	Euk	SAR	Rhi	Ce	Im	Si_Euglypha	KT232134	100	0.84	SAR	Str	Ba	Co	Ch	Tenuicylindrus-belgicus	7	0.65392	7	14	0	0	0	0	0	0	0	0	0	0	0	0	0	0	0	0	0	0	0	0	0	0	0	0	0	0	2	0	0	0
OTU1052	Euk	SAR	Rhi	Ce	Ce	He_Heteromita	U42447	100	1	SAR	Rhi	Ce	Ce	He	Bodomorpha-sp	3	0.00097	6	14	0	0	0	0	0	0	0	0	0	0	0	0	0	0	0	0	0	1	0	0	0	0	0	0	0	0	0	0	0	0
OTU1158	Euk	SAR	Str	Ba	Ba	Ba_Nitzschia	AJ867018	100	0.97	SAR	Str	Ba	Ba	Ba	Sellaphora-sp	3	0.05483	5	14	0	0	0	0	0	1	0	0	0	0	0	0	0	0	0	0	0	0	0	0	0	0	0	0	0	0	0	0	0	0
OTU1007	Euk	SAR	Rhi	Ce	Im	Si_Euglypha	AJ418788	100	0.95	SAR	Rhi	Ce	Im	Si	Sphenoderia-macrolepis	3	0.12695	4	14	0	0	0	0	1	0	0	0	0	0	0	0	0	0	0	0	0	0	0	0	0	0	0	0	0	0	6	0	5	0
OTU988	Euk	SAR	Str	Ba	Fr	Fr_Catacombas	KR048195	100	1	SAR	Str	Ba	Fr	Fr	Grammonema-sp	3	0	3	14	0	9	0	0	0	0	0	0	0	0	0	0	0	0	0	0	0	0	0	0	0	0	0	0	3	0	0	0	0	0
OTU964	Euk	SAR	Alv	Ci	In	Ol_Mesanophrys	JN885085	100	0.97	SAR	Alv	Ci	In	Ol	Mesanophrys-carcini	3	0.0546	3	14	0	0	0	0	0	0	0	0	0	0	1	0	0	0	0	0	0	0	0	0	0	0	0	0	0	0	0	0	0	0
OTU879	Euk	SAR	Rhi	Ce	Im	Si_Euglypha	KT232134	100	0.95	SAR	Rhi	Ce	Gy		Gymnophrys-cometa	6	0.08551	3	14	0	0	0	0	0	0	0	0	0	0	0	0	11	0	0	0	0	0	0	0	0	0	0	0	0	0	0	0	0	0
OTU1039	Euk	SAR	Str	Ba	Me	Bi_Dimeregramma	JX413547	100	0.96	SAR	Str	Ba	Co	Co	Corethron-sp	3	0.13736	2	14	0	0	0	0	0	3	0	0	0	0	0	0	0	0	0	0	0	11	0	0	0	0	0	0	0	0	0	0	0	0
OTU999	Euk	SAR	Rhi	Ce	Ce	Ce_Massisteria	KM065452	100	0.82	SAR	Rhi	Ce	Ce	Mi	Micrometopion-nutans	2	0.61582	2	14	0	0	0	0	0	0	0	0	0	0	0	0	0	0	0	0	0	0	0	0	0	0	0	0	0	0	0	0	0	0
OTU741	Euk	SAR	Str	Ba	Ba	Ba_Entomoneis	AJ535160	100	0.94	SAR	Str	Ba	Ba	Ba	Diploneis-subovalis	4	0.18329	1	14	0	0	0	0	0	0	0	14	0	0	0	0	0	0	0	0	0	0	0	0	0	0	0	0	0	0	0	0	0	0
OTU1075	Euk	SAR	Alv	Ci	In	Na_Trochiliopsis	JQ918367	100	0.83	SAR	Alv	Co	Co		Colpodella-sp	3	0.29709	1	14	0	0	0	0	0	0	0	0	14	0	0	0	0	0	0	0	0	0	0	0	0	0	0	0	0	0	0	0	0	0
OTU1044	Euk	SAR	Rhi	Ce	Im	Si_Protaspis	FJ824125	100	0.99	SAR	Rhi	Ce	Im	Si	Protaspis-sp	8	0.0437	1	14	0	0	0	0	0	0	0	0	0	0	0	0	0	0	0	0	0	0	0	0	0	0	0	0	0	0	0	0	0	0
OTU952	Euk	SAR	Str	Ba	Co	Co_Corethron	KC309527	100	0.99	SAR	Str	Ba	Co	Co	Corethron-sp	5	0.02515	1	14	0	0	0	0	0	0	0	0	0	0	0	0	0	0	0	0	0	0	0	0	0	0	0	0	0	0	0	0	0	0
OTU1167	Euk	SAR	Str	Ba	Ba	Ba_Campylodiscus	HQ912413	100	0.83	SAR	Alv	Ci	In	Pr	Placus-striatus	2	0.08784	1	14	0	0	0	0	0	0	0	0	0	0	0	0	0	0	0	0	0	0	0	0	0	0	0	0	0	0	0	0	0	0
OTU869	Euk	SAR	Str	Ba	Ba	Ba_Navicula	KT072983	100	0.96	SAR	Str	Ba	Ba	Ba	Diadesmis-gallica	2	0.10947	1	14	0	0	0	0	0	0	0	0	0	0	0	0	0	0	0	0	0	0	0	0	0	0	0	0	0	0	0	0	0	0
OTU963	Euk	SAR	Str	Oo	Sa	Sa_Aquastella	KF294791	100	0.86	SAR	Str	Ba	Co	Ch	Chaetoceros-muellerii	3	0.4447	1	14	0	0	0	0	0	0	0	0	0	0	0	0	0	0	0	0	0	0	0	0	0	0	0	0	0	0	0	0	0	0
OTU863	Euk	SAR	Str	Bi	un	Ha_Halocafeteria	KF545980	100	0.91	SAR	Str	Bi	un	Ha	Halocafeteria-seosinensis	4	0.24063	1	14	0	0	0	0	0	0	0	0	0	0	0	0	0	0	0	0	0	0	0	0	0	0	0	0	0	0	0	0	0	0
OTU905	Euk	SAR	Alv	Ci	In	Sp_Strombidium	FJ480419	100	0.96	SAR	Alv	Ci	In	Sp	Strombidium-basimorphum	3	0.10557	9	13	0	0	0	0	0	0	0	0	0	0	0	0	0	0	0	3	0	0	0	0	0	1	0	2	0	0	0	0	0	0
OTU306	Euk	SAR	Rhi	Ce		_Auranticordis	EU484394	100	0.96	SAR	Rhi	Ce			Auranticordis-quadriverberis	7	0.06761	6	13	0	0	0	0	1	0	0	0	0	0	0	0	0	0	0	0	0	0	0	0	0	0	0	0	0	0	0	0	0	0
OTU1031	Euk	SAR	Str	Ba	Fr	Fr_Licmophora	AY633759	100	0.95	SAR	Str	Ba	Fr	Fr	Licmophora-remulus	11	0.10737	6	13	0	0	0	0	0	3	0	0	0	0	0	0	0	0	0	0	0	0	0	0	0	2	0	0	2	0	0	2	0	2
OTU1002	Euk	SAR	Str	Ba	Co	Ch_Chaetoceros	HQ710553	100	1	SAR	Str	Ba	Me	Bi	Psammoneis-obaidii	12	0.00645	5	13	0	0	0	0	0	0	0	0	0	1	0	0	0	0	0	3	0	0	0	1	0	0	0	0	0	0	0	0	0	0
OTU1014	Euk	SAR	Alv	Di	Sy	Am_Amoebophrya	AY775284	100	0.97	SAR	Alv	Di	Sy	Am	Amoebophrya-sp	8	0.09448	4	13	1	0	0	0	0	0	0	0	0	2	0	0	0	0	0	0	0	0	0	0	0	0	0	0	0	0	0	8	0	0
OTU1113	Euk	SAR	Rhi	Ce	Im	Si_Euglypha	EF456755	100	0.96	SAR	Rhi	Ce	Ce	Ce	Massisteria-sp	9	0.13063	4	13	0	0	7	0	0	0	0	0	0	0	0	0	0	0	0	0	0	0	0	0	0	0	0	1	0	0	2	0	3	0
OTU998	Euk	SAR	Rhi	Ce	Im	Si_Corythion	EF456751	100	0.88	SAR	Str	Bl			Blastocystis-geocheloni	3	0.26177	4	13	0	0	0	0	0	0	0	1	0	0	0	0	0	0	0	0	3	0	0	0	0	0	0	0	0	0	0	0	0	0
OTU1024	Euk	SAR	Alv	Ci	In	Sp_Codonaria	JQ408202	100	0.99	SAR	Alv	Ci	In	Sp	Schmidingerella-quequenensis	4	0.03939	4	13	0	0	0	0	0	0	0	0	0	1	0	0	0	0	0	0	0	0	0	0	0	0	0	0	0	0	0	0	0	0
OTU1317	Euk	SAR	Str	PX	Ph	Fu_Sargassum	AB011428	100	1	SAR	Str	PX	Ph	Fu	Sargassum-macrocarpum	2	0.00076	3	13	0	0	4	2	0	0	0	0	0	0	0	0	0	0	0	0	0	0	0	0	0	0	0	0	0	0	0	0	0	7
OTU1189	Euk	SAR	Rhi	Ce	Im	Si_Assulina	EF456749	100	0.98	SAR	Rhi	Ce	Im	Si	Sphenoderia-macrolepis	5	0.02071	3	13	0	0	0	0	0	0	0	0	1	0	0	0	0	0	0	0	0	0	0	0	0	0	0	0	0	0	0	0	0	0
OTU953	Euk	SAR	Str	Bi	Bi	Bi_Bicosoeca	KM816648	100	0.99	SAR	Str	Bi	Bi	Bi	Bicosoeca-kenaiensis	2	0.0237	3	13	0	0	0	0	0	0	0	0	0	0	0	0	0	0	0	0	0	0	0	0	0	0	0	0	0	0	0	0	0	0
OTU1099	Euk	SAR	Rhi	Ce	Ph	Ph_Challengeron	AB998893	100	0.92	SAR	Rhi	Ce	Im	Si	Trachelocorythion-pulchellum	9	0.30261	2	13	0	0	0	12	0	0	0	0	0	0	0	0	0	0	0	0	0	0	0	0	0	0	0	0	0	0	0	0	0	0
OTU1059	Euk	SAR	Str	Ba	Ba	Ba_Navicula	KF177774	100	0.95	SAR	Str	Ba	Fr	Fr	Asterionella-glacialis	3	0.15197	2	13	0	0	0	0	0	0	0	0	0	0	0	0	0	11	0	0	0	0	0	0	0	0	0	0	0	0	0	0	0	0
OTU1218	Euk	SAR	Str	Ba	Co	Ch_Chaetoceros	EU090012	100	0.94	SAR	Str	Ba	Co	Ch	Chaetoceros-neogracilis	3	0.15545	2	13	0	0	0	0	0	0	0	0	0	0	0	0	0	0	0	0	0	0	0	2	0	0	0	0	0	0	0	0	0	0
OTU801	Euk	SAR	Alv	Ap	Co	Gr_Selenidium	AY196709	100	0.89	SAR	Str	Ba	Ba	Ba	Fistulifera-saprophila	2	0.12188	2	13	0	0	0	0	0	0	0	0	0	0	0	0	0	0	0	0	0	0	0	0	0	0	0	0	0	0	0	0	0	0
OTU1071	Euk	SAR	Str	Ba	Ba	Ba_Navicula	KT072983	100	0.99	SAR	Str	Oo	Sa	Sa	Saprolegnia-parasitica	2	0.19162	2	13	0	0	0	0	0	0	0	0	0	0	0	0	0	0	0	0	0	0	0	0	0	0	0	0	0	0	0	0	0	0
OTU927	Euk	SAR	Str	Ch	Ch	Pa_Paraphysomonas	JQ967309	100	0.91	SAR	Str	Ba	Co	un	Coscinodiscophyceae-sp	2	0.09187	1	13	13	0	0	0	0	0	0	0	0	0	0	0	0	0	0	0	0	0	0	0	0	0	0	0	0	0	0	0	0	0
OTU1174	Euk	SAR	Alv	Ci	In	Sp_Rimostrombidium	FJ876964	100	0.94	SAR	Alv	Ci	In	Sp	Rimostrombidium-veniliae	3	0.1092	1	13	0	0	0	0	0	0	13	0	0	0	0	0	0	0	0	0	0	0	0	0	0	0	0	0	0	0	0	0	0	0
OTU1050	Euk	SAR	Alv	Ci	In	Co_Colpoda	EU039893	100	1	SAR	Alv	Ci	In	Co	Colpoda-cucullus	2	0.0015	1	13	0	0	0	0	0	0	0	0	13	0	0	0	0	0	0	0	0	0	0	0	0	0	0	0	0	0	0	0	0	0
OTU1072	Euk	SAR	Alv	Ci	In	Sp_Strombidium	FJ480419	100	0.96	SAR	Alv	Ci	In	Sp	Strombidium-basimorphum	4	0.10467	1	13	0	0	0	0	0	0	0	0	0	0	0	0	0	0	0	0	0	0	0	0	0	0	0	0	0	0	0	0	0	0
OTU948	Euk	SAR	Str	Ba	Ba	Ba_Fallacia	KJ961671	100	0.99	SAR	Str	Ba	Ba	Ba	Diploneis-subovalis	3	0.03375	1	13	0	0	0	0	0	0	0	0	0	0	0	0	0	0	0	0	0	0	0	0	0	0	0	0	0	0	0	0	0	0
OTU912	Euk	SAR	Rhi	Ce	Ce	He_Bodomorpha	AF411276	100	0.93	SAR	Rhi	Ce	Th		Mataza-hastifera	5	0.14282	1	13	0	0	0	0	0	0	0	0	0	0	0	0	0	0	0	0	0	0	0	0	0	0	0	0	0	0	0	0	0	0
OTU1181	Euk	SAR	Str	PX	Xa	Mi_Chlorellidium	FJ030892	100	0.98	SAR	Str	Ba	Ba	Ba	Frustulia-aotearoa	7	0.05036	8	12	0	0	0	0	0	0	0	0	0	2	0	0	0	0	2	0	0	0	0	0	2	0	0	0	0	0	0	2	0	0
OTU1016	Euk	SAR	Str	Di	Fl	_Pseudochattonella	AM850218	100	0.96	SAR	Str	Di	Fl		Pseudochattonella-farcimen	3	0.10404	7	12	0	0	0	0	0	1	0	0	0	2	0	0	0	2	0	0	0	0	0	1	0	0	0	0	0	0	0	0	0	0
OTU1258	Euk	SAR	Rhi	Ce	Im	Si_Trinema	AJ418792	100	0.97	SAR	Rhi	Ce	Im	Si	Cyphoderia-major	4	0.15402	7	12	0	0	0	0	0	0	0	0	0	0	2	0	0	2	0	2	0	0	0	0	0	0	0	0	0	0	0	0	0	0
OTU1008	Euk	SAR	Alv	Ci	In	Sp_Stenosemella	AB640648	100	0.98	SAR	Alv	Ci	In	Sp	Stenosemella-nivalis	3	0.04492	6	12	0	0	0	0	0	1	0	0	0	0	0	0	0	2	0	0	0	0	0	0	0	0	0	0	0	0	0	0	0	0
OTU1079	Euk	SAR	Rhi	Ce	Th	Le_Lecythium	KP728379	100	0.94	SAR	Rhi	Ce	Th	Ch	Rhogostoma-minus	5	0.18795	5	12	0	0	0	0	0	0	0	0	0	0	0	0	0	2	0	0	6	0	0	0	0	0	0	0	0	0	1	0	0	0
OTU1196	Euk	SAR	Str	La	Th	La_Labyrinthuloides	AF265339	100	0.97	SAR	Str	La	La	La	Labyrinthula-sp	4	0.25129	5	12	0	0	0	0	1	0	0	0	0	0	0	0	0	0	0	0	0	0	0	0	0	0	0	0	0	0	0	0	0	0
OTU777	Euk	SAR	Str	Ba	Fr	Fr_Licmophora	AY633756	100	0.99	SAR	Str	Ba	Me	Bi	Psammoneis-obaidii	10	0.00645	5	12	0	0	0	0	0	0	0	0	0	0	1	0	0	0	0	0	0	0	0	0	0	0	0	0	0	0	1	0	0	0
OTU1093	Euk	SAR	Str	Oo	Ol	Ol_Olpidiopsis	AB363063	100	0.94	SAR	Str	Ba	Ba	Ba	Amphora-commutata	13	0.08568	3	12	0	0	0	0	0	0	0	0	0	0	0	0	0	0	0	0	0	0	0	0	1	0	0	0	0	0	0	0	0	0
OTU1045	Euk	SAR	Str	Ba	Co	Th_Skeletonema	EF138935	100	0.98	SAR	Str	Ba	Ba	Ba	Hantzschia-sp	2	0.06941	3	12	0	0	0	0	0	0	0	0	0	0	0	0	0	0	0	0	0	0	0	0	0	0	0	0	0	0	0	0	0	0
OTU671	Euk	SAR	Rhi	Ce	Im	Si_Thaumatomastix	GQ144681	100	1	SAR	Rhi	Ce	Im	Si	Thaumatomastix-sp	4	0.01764	3	12	0	0	0	0	0	0	0	0	0	0	0	0	0	0	0	0	0	0	0	0	0	0	0	0	0	0	0	0	0	0
OTU751	Euk	SAR	Str	Ba	Ba	Ba_Pinnularia	AM743094	100	0.99	SAR	Str	Ba	Ba	Ba	Pinnularia-acrosphaeria	4	0.0472	2	12	0	0	0	0	0	0	0	0	4	0	0	0	0	0	8	0	0	0	0	0	0	0	0	0	0	0	0	0	0	0
OTU1208	Euk	SAR	Str	Ba	Ba	Ba_Pinnularia	JN418598	100	0.93	SAR	Str	Ba	Ba	Ba	Fragilariopsis-cylindrus	4	0.14374	2	12	0	0	0	0	0	0	0	0	0	0	0	0	0	0	0	0	0	0	0	0	0	0	0	0	0	0	0	0	0	6
OTU1206	Euk	SAR	Alv	Di	Gy	Ce_Ceratoperidinium	KP790151	100	0.99	SAR	Alv	Di	un		Dinophyceae-gen	2	0.11307	1	12	0	0	0	12	0	0	0	0	0	0	0	0	0	0	0	0	0	0	0	0	0	0	0	0	0	0	0	0	0	0
OTU729	Euk	SAR	Alv	Ci	In	Sp_Amphisiella	KU594636	100	0.96	SAR	Alv	Ci	In	Sp	Oxytricha-saltans	2	0.06482	1	12	0	0	0	0	0	0	0	0	12	0	0	0	0	0	0	0	0	0	0	0	0	0	0	0	0	0	0	0	0	0
OTU1041	Euk	SAR	Str	Ba	Co	Th_Thalassiosira	AM050629	100	0.99	SAR	Str	Ba	Co	Th	Thalassiosira-mala	16	0.01418	1	12	0	0	0	0	0	0	0	0	0	0	0	0	0	0	0	0	0	0	0	0	0	0	0	12	0	0	0	0	0	0
OTU974	Euk	SAR	Rhi	Ce	Va	Le_Leptophrys	HE609039	100	0.85	SAR	Rhi	Ce	Va	Va	Penardia-sp	5	0.42971	1	12	0	0	0	0	0	0	0	0	0	0	0	0	0	0	0	0	0	0	0	0	0	0	0	0	0	0	0	0	0	0
OTU1067	Euk	SAR	Rhi	Ce	Im	Si_Euglypha	KT232134	100	0.92	SAR	Rhi	Ce	Ce	Ce	Massisteria-marina	6	0.1636	1	12	0	0	0	0	0	0	0	0	0	0	0	0	0	0	0	0	0	0	0	0	0	0	0	0	0	0	0	0	0	0
OTU1121	Euk	SAR	Alv	Di	Gy	Po_Pheopolykrikos	DQ371295	100	0.95	SAR	Alv	Di	Pe	Ox	Sabulodinium-undulatum	3	0.1291	1	12	0	0	0	0	0	0	0	0	0	0	0	0	0	0	0	0	0	0	0	0	0	0	0	0	0	0	0	0	0	0
OTU1055	Euk	SAR	Alv	Di	Gy	Gy_Gyrodinium	AB120003	100	0.99	SAR	Alv	Di	Gy	Gy	Gyrodinium-rubrum	3	0	1	12	0	0	0	0	0	0	0	0	0	0	0	0	0	0	0	0	0	0	0	0	0	0	0	0	0	0	0	0	0	0
OTU1284	Euk	SAR	Str	Ba	Ba	Ba_Navicula	KF417681	100	0.96	SAR	Str	Ba	Ba	Ba	Eucocconeis-laevis	3	0.06419	9	11	0	0	0	0	1	0	0	1	0	0	0	0	0	0	0	0	0	0	0	0	0	0	0	0	0	2	0	0	0	0
OTU1176	Euk	SAR	Str	Ba	Fr	Fr_Tetracyclus	KJ577873	100	0.96	SAR	Str	Ba	Fr	Fr	Licmophora-remulus	3	0.08684	9	11	0	0	0	0	0	0	1	0	0	0	0	1	0	0	0	1	0	0	0	0	0	0	0	0	0	0	0	2	0	0
OTU1212	Euk	SAR	Str	Ba	Ba	Ba_Navicula	KT072983	100	0.97	SAR	Str	Ba	Ba	Ba	Pinnularia-obscura	2	0.04951	8	11	0	0	0	0	0	0	0	0	0	1	0	0	0	0	0	0	0	0	0	0	0	0	0	0	0	0	1	0	0	0
OTU1003	Euk	SAR	Str	Ba	Me	Bi_Terpsinoe	KJ577872	100	0.95	SAR	Str	Ba	Co	Rh	Proboscia-indica	9	0.16795	8	11	0	0	0	0	0	0	0	0	0	0	0	0	0	0	0	0	0	0	0	1	0	0	0	0	1	0	0	1	0	0
OTU987	Euk	SAR	Str	Ba	Fr	Fr_Tetracyclus	KJ577873	100	0.99	SAR	Str	Ba	Ba	Ba	Amphipleuraceae-sp	5	0.03355	7	11	0	0	0	0	0	0	0	0	0	0	0	0	0	0	1	0	0	0	0	0	0	0	2	0	0	2	0	0	0	0
OTU1078	Euk	SAR	Str	Ba	Me	Cy_Extubocellulus	AY485504	100	0.93	SAR	Str	Ba	Fr	Fr	Licmophora-remulus	9	0.13225	6	11	0	0	0	0	0	1	0	1	0	0	0	0	0	1	0	0	0	0	0	0	0	0	0	1	0	0	0	0	0	0
OTU1102	Euk	SAR	Alv	Ci	In	Sp_Spirostrombidium	KM222098	100	0.9	SAR	Alv	Ci	In	Sp	Pseudotontonia-simplicidens	3	0.26328	5	11	0	1	0	1	0	0	0	2	0	0	0	0	0	0	0	4	0	0	0	0	0	0	0	0	0	0	0	0	0	0
OTU1062	Euk	SAR	Rhi	Ce	Pl	Pl_Ligniera	KF111227	100	0.93	SAR	Str	Ba	Ba	Ba	Amphipleura-pellucida	2	0.06982	5	11	0	0	0	0	0	1	0	0	0	0	0	0	0	0	0	0	0	0	0	0	1	1	0	0	0	0	0	0	0	0
OTU592	Euk	SAR	Rhi	Ce	Im	Si_Sphenoderia	KF539409	100	0.99	SAR	Rhi	Ce	Im	Si	Sphenoderia-macrolepis	5	0.012	5	11	0	0	0	0	0	0	0	0	4	0	0	0	0	0	0	0	0	0	0	0	0	0	0	0	1	0	0	0	0	0
OTU1081	Euk	SAR	Str	Ba	Co	Th_Thalassiosira	JF428841	100	0.97	SAR	Str	Ba	Co	Th	Thalassiosira-mala	26	0.09361	5	11	0	0	0	0	0	0	0	0	0	0	0	0	0	0	0	1	0	0	0	3	0	0	0	0	1	0	0	2	0	0
OTU1311	Euk	SAR	Str	Oo	Pe	Ph_Phytophthora	AY744947	100	0.81	SAR	Alv	Ci	un		Ciliophora-sp	2	0.30709	4	11	1	0	0	0	0	0	0	0	0	0	0	0	0	0	0	0	6	0	0	0	0	0	0	0	0	0	0	0	0	0
OTU1494	Euk	SAR	Str	Ba	Co	Th_Thalassiosira	EF585582	100	0.97	SAR	Str	Ba	Co	Th	Thalassiosira-weissflogii	3	0.08553	4	11	0	0	0	0	0	2	0	0	0	0	0	0	0	0	0	0	0	0	0	2	0	0	0	0	0	0	0	0	0	0
OTU1400	Euk	SAR	Rhi	Ce	Th	Eb_Ebria	DQ303923	100	0.91	SAR	Rhi	un			Dimorpha-like-sp	4	0.06243	4	11	0	0	0	0	0	0	0	0	3	4	0	0	0	0	0	0	0	0	0	0	0	0	0	0	0	0	0	0	0	0
OTU1321	Euk	SAR	Str	Ba	Ba	Ba_Nitzschia	AJ867278	100	0.97	SAR	Str	Ba	Co	Th	Thalassiosira-mala	7	0.07311	2	11	0	0	0	0	0	0	0	0	1	0	0	0	0	0	0	0	0	0	0	0	0	0	0	0	0	0	0	0	0	0
OTU1082	Euk	SAR	Alv	Ci	Po	He_Gruberia	KJ651818	100	0.89	SAR	Rhi	Ce	Ce	Ce	Massisteria-sp	3	0.23157	2	11	0	0	0	0	0	0	0	0	0	0	0	0	0	0	0	0	0	0	0	0	1	0	0	0	0	0	0	0	0	0
OTU1207	Euk	SAR	Rhi	Ce	Pl	Pl_Spongospora	AF245217	100	0.91	SAR	Rhi	Ce	Ce	Sa	Sainouron-acronematica	5	0.55198	1	11	0	0	0	0	0	0	11	0	0	0	0	0	0	0	0	0	0	0	0	0	0	0	0	0	0	0	0	0	0	0
OTU1033	Euk	SAR	Alv	Di	Pe	Gl_Peridiniopsis	HM596542	100	0.88	SAR	Alv	Pe	Pe	Pe	Parvilucifera-prorocentri	2	0.25843	1	11	0	0	0	0	0	0	11	0	0	0	0	0	0	0	0	0	0	0	0	0	0	0	0	0	0	0	0	0	0	0
OTU1144	Euk	SAR	Str	Ba	Ba	Ba_Meuniera	KC309482	100	0.96	SAR	Str	Ba	Ba	Ba	Pleurosigma-planktonicum	5	0.08081	1	11	0	0	0	0	0	0	0	0	0	0	0	0	0	0	0	11	0	0	0	0	0	0	0	0	0	0	0	0	0	0
OTU1228	Euk	SAR	Str	Ch	Ch	Ch_Chrysowaernella	HQ710556	100	1	SAR	Str	Ch	Ch	Ch	Chrysowaernella-hieroglyphica	3	0.03645	1	11	0	0	0	0	0	0	0	0	0	0	0	0	0	0	0	0	0	0	0	0	0	0	0	0	0	0	0	0	0	0
OTU1161	Euk	SAR	Str	Di	Pe	He_Helicopedinella	AB097408	100	0.95	SAR	Str	Di	Pe	un	Pedinellales-sp	4	0.00417	1	11	0	0	0	0	0	0	0	0	0	0	0	0	0	0	0	0	0	0	0	0	0	0	0	0	0	0	0	0	0	0
OTU976	Euk	SAR	Alv	Ci	In	Sp_Uncinata	KP717083	100	0.82	SAR	Rhi	Ce	Va	Le	Leptophryidae-sp	5	0.35976	1	11	0	0	0	0	0	0	0	0	0	0	0	0	0	0	0	0	0	0	0	0	0	0	0	0	0	0	0	0	0	0
OTU1147	Euk	SAR	Alv	Ci	In	Sp_Strombidium	KP260513	100	0.97	SAR	Alv	Ci	In	Sp	Strombidium-caudispina	4	0.07674	8	10	0	0	0	0	0	0	0	0	0	0	0	0	0	0	0	0	0	2	0	0	0	0	1	0	0	1	0	0	0	0
OTU1269	Euk	SAR	Str	Di	Pe	Ap_Apedinella	HQ710559	100	0.99	SAR	Str	Di	Rh	Rh	Rhizochromulina-cf	9	0.00494	7	10	0	0	0	1	0	0	0	0	0	0	0	0	0	0	1	0	0	2	0	0	1	0	0	0	0	0	0	0	0	0
OTU1020	Euk	SAR	Str	In		_Incisomonas	JN848814	100	0.96	SAR	Str	In			Incisomonas-marina	3	0.06962	7	10	0	0	0	0	0	0	0	0	0	0	0	0	0	0	0	0	1	1	0	0	0	0	0	0	0	1	0	0	0	0
OTU1080	Euk	SAR	Str	Di	Pe	Ps_Pseudopedinella	HQ710560	100	0.96	SAR	Str	Di	Pe	Ps	Pseudopedinella-sp	3	0.07702	7	10	0	0	0	0	0	0	0	0	0	0	0	0	0	0	0	0	0	2	0	0	1	0	0	0	0	2	1	0	0	0
OTU1271	Euk	SAR	Rhi	Ce	Ce	Ce_Paracercomonas	FJ790720	100	0.96	SAR	Rhi	Ce	De	Cl	Clathrulina-elegans	4	0.12971	7	10	0	0	0	0	0	0	0	0	0	0	0	0	0	0	0	0	0	2	0	0	0	0	1	0	0	1	0	0	0	0
OTU1309	Euk	SAR	Alv	Ci	In	Sp_Strombidium	JF791016	100	0.97	SAR	Alv	Ci	In	Sp	Strombidium-cf	4	0.08389	6	10	1	0	0	0	0	0	0	0	0	0	0	0	0	0	0	0	2	1	0	0	0	0	2	0	0	3	0	0	0	0
OTU1340	Euk	SAR	Alv	Di	Gy	Gy_Gyrodinium	AB120003	100	0.96	SAR	Alv	Di	Gy	Gy	Gyrodinium-rubrum	4	0.10443	6	10	0	0	0	2	0	0	0	4	0	0	0	0	0	0	0	0	0	0	1	1	0	0	0	0	0	0	0	0	0	0
OTU1061	Euk	SAR	Str	PX	Ph	Ec_Stschapovia	AB117921	100	0.96	SAR	Str	Ba	Fr	Fr	Licmophora-grandis	20	0.16399	6	10	0	0	0	0	0	2	0	0	0	0	0	0	0	0	0	1	0	0	1	0	0	0	0	0	0	0	0	3	0	0
OTU1132	Euk	SAR	Str	Ba	Co	Co_Corethron	KC309527	100	0.98	SAR	Str	Ba	Co	Co	Corethron-sp	3	0.06752	6	10	0	0	0	0	0	0	0	4	0	0	0	0	0	1	0	0	0	0	0	0	0	0	0	0	0	0	0	0	0	0
OTU1042	Euk	SAR	Alv	Ci	In	Sp_Codonaria	JQ408202	100	0.96	SAR	Alv	Ci	In	Sp	Schmidingerella-quequenensis	3	0.10203	6	10	0	0	0	0	0	0	0	0	0	0	0	0	0	0	0	0	0	0	0	0	0	0	0	0	1	0	0	0	0	1
OTU1186	Euk	SAR	Alv	Ci	In	Sp_Halteria	LN869995	100	1	SAR	Alv	Ci	In	Sp	Halteria-sp	4	0.0055	5	10	0	0	0	0	0	0	0	0	0	0	0	0	0	0	0	0	0	0	0	0	0	0	0	0	0	2	0	0	0	0
OTU862	Euk	SAR	Rhi	Ce	Im	Si_Sphenoderia	KF539409	100	0.99	SAR	Rhi	Ce	Im	Si	Sphenoderia-macrolepis	5	0.012	5	10	0	0	0	0	0	0	0	0	5	0	0	0	0	0	0	0	0	0	0	0	0	0	0	0	0	0	0	0	0	0
OTU1077	Euk	SAR	Alv	Di	Go	Am_Amphidiniella	LC057317	100	0.91	SAR	Alv	Di	Gy	Ka	Takayama-cf	6	0.13931	5	10	0	0	0	0	2	0	0	0	0	0	5	0	0	0	0	0	1	0	0	0	0	0	0	0	0	0	0	0	0	0
OTU434	Euk	SAR	Str	Ba	Ba	Ba_Navicula	AM501976	100	0.98	SAR	Str	Ba	Co	Th	Thalassiosira-mala	3	0.0336	5	10	0	0	0	0	0	2	0	0	0	0	0	0	0	0	0	0	0	0	0	0	0	4	0	0	0	0	0	0	0	0
OTU842	Euk	SAR	Str	La	Th	Sc_Schizochytrium	AB022108	100	0.97	SAR	Str	La	Th	Sc	Schizochytrium-minutum	3	0.09472	5	10	0	0	0	0	0	0	0	0	0	0	0	0	0	0	0	0	1	0	0	0	0	0	0	0	0	0	0	0	0	0
OTU1262	Euk	SAR	Str	Ba	Me	Bi_Cerataulina	HQ912669	100	0.99	SAR	Str	Ba	Me	Bi	Cerataulina-pelagica	3	0.04406	5	10	0	0	0	0	0	0	0	0	0	0	0	0	0	0	0	0	0	1	0	0	0	0	0	0	0	0	0	0	0	0
OTU1349	Euk	SAR	Alv	Di	Gy	Gy_Gyrodinium	AB120001	100	0.96	SAR	Alv	Di	Gy	Gy	Gyrodinium-cf	3	0.08244	5	10	0	0	0	0	0	0	0	0	0	0	0	0	0	0	0	0	0	0	0	2	0	0	0	0	1	0	0	0	1	0
OTU1149	Euk	SAR	Alv	Ci	In	Sp_Tintinnopsis	AB640668	100	0.99	SAR	Alv	Ci	In	Sp	Codonellopsis-morchella	5	0.06156	4	10	0	0	0	0	0	0	0	0	0	0	0	0	0	0	0	3	0	0	0	0	0	0	0	5	0	0	0	1	0	0
OTU1173	Euk	SAR	Str	Ba	Co	Rh_Guinardia	KC309536	100	0.97	SAR	Str	Ba	Co	Ch	Chaetoceros-radicans	8	0.15064	4	10	0	0	0	0	0	0	0	1	0	0	0	0	0	0	0	0	0	0	0	0	0	0	0	0	0	0	0	3	0	0
OTU735	Euk	SAR	Rhi	Ce	Th	Le_Lecythium	KP728379	100	0.99	SAR	Rhi	Ce	Th		Mataza-hastifera	6	0.03573	4	10	0	0	0	0	0	0	0	1	0	0	0	0	0	0	0	0	0	0	0	0	0	0	0	0	0	0	0	0	1	0
OTU1362	Euk	SAR	Alv	Ci	In	Sp_Eutintinnus	KU715759	100	0.99	SAR	Alv	Ci	In	Sp	Eutintinnus-cf	4	0.06148	4	10	0	0	0	0	0	0	0	0	0	0	0	0	0	0	0	0	0	3	0	0	0	0	0	0	3	0	0	0	0	0
OTU1000	Euk	SAR	Alv	Co	Co	_Colponema	KJ598081	100	0.93	SAR	Str	Bi	Ca		Caecitellus-paraparvulus	4	0.24572	3	10	0	0	0	0	7	0	0	0	0	0	0	0	0	0	0	0	0	0	0	0	0	0	0	0	0	0	0	0	0	0
OTU1324	Euk	SAR	Rhi	Ce	Ce	Ce_Paracercomonas	FJ790727	100	0.88	SAR	Str	Bi	Ne		Nerada-mexicana	3	0.12715	3	10	0	0	0	0	0	0	0	0	0	0	0	0	0	0	0	0	0	1	0	0	0	0	0	0	0	0	0	0	0	0
OTU1114	Euk	SAR	Str	Oo	Py	Py_Halophytophthora	HQ161106	100	0.94	SAR	Str	Ba	Fr	Fr	Licmophora-grandis	3	0.0613	3	10	0	0	0	0	0	0	0	0	0	0	0	0	0	0	0	0	0	0	0	0	0	0	4	0	0	0	0	0	2	0
OTU1320	Euk	SAR	Rhi	Ce	Im	Si_Assulina	EF456749	100	0.9	SAR	Rhi	Ce	Im	Ma	Pseudopirsonia-mucosa	4	0.21008	2	10	0	0	0	0	3	0	0	0	0	0	0	0	0	0	0	0	0	0	0	0	0	0	0	0	0	0	0	0	0	0
OTU808	Euk	SAR	Str	Ba	Co	Co_Paralia	KJ577865	100	0.98	SAR	Str	Ba	Co	Co	Aulacoseira-skvortzowii	2	0.12886	2	10	0	0	0	0	0	2	0	0	0	0	0	0	0	0	0	0	0	0	0	0	0	0	0	0	0	0	0	0	0	0
OTU1210	Euk	SAR	Str	Ba	Co	Th_Thalassiosira	KU352756	100	0.91	SAR	Str	Ba	Co	Th	Skeletonema-menzellii	3	0.30336	2	10	0	0	0	0	0	0	0	0	0	0	0	0	0	1	0	0	0	0	0	0	0	0	0	0	0	0	0	0	0	0
OTU1116	Euk	SAR	Str	Ba	Ba	Ba_Planothidium	KJ658411	100	0.99	SAR	Str	Ba	Me	Bi	Dimeregramma-sp	3	0.02035	2	10	0	0	0	0	0	0	0	0	0	0	0	0	0	0	0	0	0	0	0	0	0	0	0	0	0	0	0	0	0	1
OTU1242	Euk	SAR	Rhi	Ce	Im	Si_Euglypha	AJ418782	100	0.84	SAR	Rhi	Ce	Im	Si	Euglypha-tuberculata	3	0.31492	1	10	0	0	0	10	0	0	0	0	0	0	0	0	0	0	0	0	0	0	0	0	0	0	0	0	0	0	0	0	0	0
OTU1187	Euk	SAR	Rhi	Ce	Im	Si_Corythion	EF456751	100	0.96	SAR	Rhi	Ce	Im	Si	Trachelocorythion-pulchellum	8	0.03029	1	10	0	0	0	0	0	0	0	0	0	0	0	0	0	0	0	0	0	0	0	0	10	0	0	0	0	0	0	0	0	0
OTU1152	Euk	SAR	Str	Ba	Co	Th_Thalassiosira	JF794045	100	0.95	SAR	Str	Ba	Co	Th	Thalassiosira-mala	20	0.16169	1	10	0	0	0	0	0	0	0	0	0	0	0	0	0	0	0	0	0	0	0	0	0	10	0	0	0	0	0	0	0	0
OTU1322	Euk	SAR	Str	Ba	Ba	Ba_Luticola	AM501967	100	0.89	SAR	Alv	Ci	In	Sp	Holosticha-diademata	2	0.07914	1	10	0	0	0	0	0	0	0	0	0	0	0	0	0	0	0	0	0	0	0	0	0	0	0	0	0	0	0	0	0	0
OTU1054	Euk	SAR	Rhi	Ce	Ce	Ce_Massisteria	AF174370	100	0.98	SAR	Rhi	Ce	Ce	Ce	Massisteria-marina	8	0.02947	1	10	0	0	0	0	0	0	0	0	0	0	0	0	0	0	0	0	0	0	0	0	0	0	0	0	0	0	0	0	0	0
OTU1140	Euk	SAR	Str	Ba	Ba	Ba_Navicula	KT072983	100	0.97	SAR	Str	Ba	un		Bacillariophyta-sp	5	0.0796	1	10	0	0	0	0	0	0	0	0	0	0	0	0	0	0	0	0	0	0	0	0	0	0	0	0	0	0	0	0	0	0
OTU982	Euk	SAR	Rhi	un		_Rhizaria	KM401881	100	0.99	SAR	Rhi	un			Rhizaria-sp	3	0.0526	1	10	0	0	0	0	0	0	0	0	0	0	0	0	0	0	0	0	0	0	0	0	0	0	0	0	0	0	0	0	0	0
OTU1015	Euk	SAR	Str	Di	Pe	Pt_Pteridomonas	AB081640	100	0.91	SAR	Str	Di	Rh	Rh	Rhizochromulina-cf	7	0.26103	8	9	0	0	0	0	0	0	0	1	0	2	0	0	0	0	0	0	1	1	0	1	0	0	0	0	0	0	0	0	0	0
OTU1115	Euk	SAR	Str	Ba	Co	Th_Cyclotella	AY485499	100	0.9	SAR	Str	Ba	Fr	Fr	Licmophora-grandis	13	0.16306	8	9	0	0	0	0	0	1	0	2	0	0	0	0	0	0	0	0	0	0	0	0	0	0	0	0	0	0	0	1	0	0
OTU1109	Euk	SAR	Str	Di	Di	Di_Dictyocha	U14385	100	0.88	SAR	Alv	Ci	In	Sp	Protocruzia-contrax	6	0.1272	8	9	0	0	0	0	0	0	0	0	0	0	0	0	0	0	1	0	0	0	0	1	0	0	2	0	0	0	0	0	0	0
OTU1151	Euk	SAR	Alv	Ci	In	Li_Askenasia	EU024989	100	0.94	SAR	Alv	Ci	In	Ol	Cyclidium-porcatum	3	0.15369	8	9	0	0	0	0	0	0	0	0	0	0	0	0	0	0	0	0	0	0	2	0	0	0	1	0	0	0	0	0	0	0
OTU1103	Euk	SAR	Alv	Ci	In	Ol_Apofrontonia	AM072621	100	0.87	SAR	Alv	Ci	In	Pr	Prorodon-viridis	5	0.15836	7	9	0	1	0	0	0	0	1	0	0	0	0	0	0	0	2	0	0	0	0	0	0	0	0	1	0	0	0	0	0	1
OTU1219	Euk	SAR	Str	Ba	Fr	Fr_Tetracyclus	KJ577873	100	0.99	SAR	Str	Ba	Co	Ch	Chaetoceros-muellerii	3	0.08254	7	9	0	0	0	0	0	0	0	0	0	0	0	0	0	0	0	0	0	0	0	0	0	1	0	0	0	0	0	1	0	0
OTU1982	Euk	SAR	Str	Ba	Co	Th_Thalassiosira	JF794045	100	0.97	SAR	Rhi	Ce	Ce	Sa	Sainouron-acronematica	3	0.47239	7	9	0	0	0	0	0	0	0	0	1	0	1	0	0	0	1	0	0	0	0	0	0	0	0	0	0	0	0	0	0	0
OTU1009	Euk	SAR	Str	Di	Di	Vi_Vicicitus	HQ646558	100	0.98	SAR	Str	De			cf-Developayella	3	0.09279	7	9	0	0	0	0	1	0	0	0	0	0	0	0	0	0	0	0	0	0	0	1	0	0	0	0	0	1	0	0	0	0
OTU1183	Euk	SAR	Str	Ba	Ba	Ba_Achnanthidium	KJ658402	100	0.89	SAR	Str	Pe	Sa	Sa	Chrysoreinhardia-sp	4	0.21563	7	9	0	0	0	0	0	1	0	0	0	0	0	0	0	1	0	0	0	0	0	1	0	0	0	0	0	0	0	0	0	0
OTU945	Euk	SAR	Alv	Ci	In	Sp_Laboea	AF399154	100	0.97	SAR	Alv	Ci	In	Sp	Laboea-strobila	3	0.09581	6	9	0	0	0	0	0	1	0	0	0	0	0	0	0	0	0	0	1	0	0	1	0	0	3	2	0	0	0	0	0	1
OTU1142	Euk	SAR	Alv	Ci	In	Sp_Tintinnopsis	AB640668	100	0.96	SAR	Alv	Ci	In	Sp	Codonellopsis-morchella	3	0.12415	6	9	0	0	0	0	0	0	0	0	0	0	1	0	0	2	0	2	0	0	0	0	0	0	0	1	0	0	0	1	0	0
OTU1126	Euk	SAR	Str	Ba	Ba	Ba_Pinnularia	JN418596	100	0.89	SAR	Rhi	Ce	Th	Ch	Rhogostoma-minus	2	0.22204	6	9	0	0	0	0	0	0	0	0	0	0	0	0	0	0	0	0	0	0	0	0	0	0	0	0	0	0	0	0	0	0
OTU637	Euk	SAR	Str	Oo	Sa	Sa_Pythiopsis	KP098376	100	0.96	SAR	Str	Ba	Co	Ch	Chaetoceros-radicans	11	0.17201	5	9	1	0	0	0	0	0	2	0	0	0	0	0	0	0	0	0	0	0	0	0	0	0	0	0	0	0	0	0	0	0
OTU1221	Euk	SAR	Rhi	Ce	Gl	Sa_Sandona	EU709138	100	0.89	SAR	Str	Ca			Cantina-marsupialis	3	0.25023	5	9	0	2	0	2	0	0	0	0	0	0	0	0	0	0	0	0	0	0	0	0	2	0	0	0	0	0	1	0	0	0
OTU892	Euk	SAR	Alv	Di	Go	Go_Alexandrium	KJ361996	100	1	SAR	Alv	Di	Go	Go	Alexandrium-tamiyavanichi	2	0.05069	5	9	0	0	0	0	0	0	0	0	0	1	0	0	0	2	0	0	0	0	0	0	0	0	0	0	0	0	0	0	0	0
OTU1488	Euk	SAR	Str	Ba	Ba	Ba_Epithemia	HQ912409	100	0.97	SAR	Str	Ba	Co	Ch	Leptocylindrus-danicus	3	0.07072	5	9	0	0	0	0	3	0	0	0	0	0	0	0	2	0	0	0	0	0	0	0	0	0	0	0	1	0	0	0	0	0
OTU1112	Euk	SAR	Str	Ba	Me	Bi_Terpsinoe	KJ577872	100	0.97	SAR	Str	Ba	Co	Ch	Chaetoceros-radicans	12	0.11192	5	9	0	0	0	0	0	1	0	0	0	0	0	0	0	0	0	0	0	0	0	0	0	0	0	0	0	0	0	1	0	0
OTU1266	Euk	SAR	Str	Ba	Ba	Ba_Fragilariopsis	KJ866919	100	0.99	SAR	Str	Ba	Ba	Ba	Fragilariopsis-cylindrus	3	0.03804	5	9	0	0	0	0	0	0	0	0	0	0	0	0	0	0	0	0	0	0	2	0	1	0	1	0	0	2	0	0	0	0
OTU1398	Euk	SAR	Str	Di	Pe	un_Pedinellales	JF794054	100	0.96	SAR	Str	Di	Pe	un	Pedinellales-sp	3	0.12781	5	9	0	0	0	0	0	0	0	0	0	0	0	0	0	0	0	0	0	0	0	1	0	0	0	2	0	0	0	0	0	0
OTU845	Euk	SAR	Str	Ba	Fr	Fr_Protoraphis	EF423413	100	0.99	SAR	Str	Ba	Ba	Ba	Rhopalodia-gibba	2	0.00539	4	9	0	0	0	0	0	0	1	0	0	0	0	0	0	0	0	0	0	0	0	0	0	0	0	0	0	0	0	0	0	0
OTU959	Euk	SAR	Rhi	Ce	Th	Le_Lecythium	KP728379	100	0.95	SAR	Rhi	Ce	Th	Tr	Trachyrhizium-urniformis	3	0.07865	4	9	0	0	0	0	0	0	0	5	0	2	0	0	0	0	0	0	0	0	0	1	0	0	0	0	0	0	0	0	0	0
OTU902	Euk	SAR	Rhi	Ce		_Auranticordis	EU484394	100	0.92	SAR	Rhi	Ce			Auranticordis-quadriverberis	11	0.06559	4	9	0	0	0	0	0	0	0	0	3	0	0	0	0	0	0	0	0	0	0	0	0	0	0	0	0	0	0	0	0	0
OTU907	Euk	SAR	Str	Oo	Sa	Sa_Aphanomyces	HQ343196	100	0.94	SAR	Str	Eu	un		Eustigmatophyceae-sp	2	0.0008	4	9	0	0	0	0	0	0	0	0	0	0	0	0	2	0	0	0	0	0	0	0	1	0	3	0	0	0	0	0	0	0
OTU1590	Euk	SAR	Rhi	Ce	Im	Si_Thaumatomonas	HQ121429	100	0.85	SAR	Str	Pe	Sa	Sa	Chrysoreinhardia-sp	4	0.25175	4	9	0	0	0	0	0	0	0	0	0	0	0	0	0	0	1	0	0	0	0	0	0	0	0	0	0	1	0	0	0	0
OTU897	Euk	SAR	Str	Ba	Co	Ch_Leptocylindrus	KC814810	100	0.81	SAR	Str	Bl			Blastocystis-geocheloni	3	0.36593	4	9	0	0	0	0	0	0	0	0	0	0	0	0	0	0	0	0	2	0	0	0	0	0	0	0	0	0	0	0	0	0
OTU1423	Euk	SAR	Alv	Ci	In	Ol_Miamiensis	JN885091	100	0.99	SAR	Alv	Ci	In	Ol	Entorhipidium-enchi	2	0.04118	4	9	0	0	0	0	0	0	0	0	0	0	0	0	0	0	0	0	0	0	0	0	0	0	2	0	0	4	0	0	0	0
OTU1043	Euk	SAR	Alv	Ci	In	Sp_Strombidium	KJ737432	100	0.96	SAR	Alv	Ci	In	Sp	Strombidium-paracalkinsi	4	0.06149	3	9	0	0	0	0	0	0	0	0	0	0	0	0	0	0	0	0	0	0	0	0	0	0	0	0	2	6	0	0	0	0
OTU965	Euk	SAR	Str	Ba	Ba	Ba_Epithemia	HQ912409	100	0.99	SAR	Str	Ba	Me	Bi	Plagiogramma-atomus	3	0.00847	3	9	0	0	0	0	0	0	0	0	0	0	0	0	0	3	0	0	0	0	0	0	0	0	0	0	0	0	0	0	0	0
OTU1368	Euk	SAR	Rhi	Ce	Th	Cr_Cryothecomonas	AF290539	100	0.99	SAR	Rhi	Ce	Th	Cr	Cryothecomonas-aestivalis	4	0.05186	3	9	0	0	0	0	0	0	0	0	0	0	0	0	0	0	0	0	0	0	0	0	4	0	0	0	0	0	0	0	0	0
OTU1283	Euk	SAR	Str	Ba	Ba	Ba_Navicula	KT072983	100	1	SAR	Str	Ba	un		Bacillariophyta-sp	9	0.00075	3	9	0	0	0	0	0	0	0	0	0	0	0	0	0	0	0	0	0	0	0	0	0	0	0	0	0	0	0	0	0	0
OTU1088	Euk	SAR	Alv	Ci	In	Ol_Pseudocohnilembus	JQ956554	100	1	SAR	Alv	Ci	In	Ol	Pseudocohnilembus-persalinus	2	0.00803	2	9	2	0	0	0	0	0	0	0	0	0	0	0	0	0	0	0	0	0	0	0	0	0	0	0	0	0	0	0	0	0
OTU1108	Euk	SAR	Alv	Ci	In	Sp_Aspidisca	EU880598	100	0.92	SAR	Alv	Ci	In	Sp	Aspidisca-magna	2	0.21501	2	9	0	0	8	0	0	0	0	0	0	0	0	0	0	0	0	0	0	0	0	1	0	0	0	0	0	0	0	0	0	0
OTU1057	Euk	SAR	Alv	Ci	un	_Ciliate	AM412525	100	0.99	SAR	Alv	Ci	un		Ciliate-sp	3	0.06978	2	9	0	0	0	0	0	0	0	0	0	0	0	0	0	0	0	0	8	0	0	0	0	0	0	0	0	0	0	0	0	0
OTU1264	Euk	SAR	Str	Oo	Sa	Sa_Aquastella	KF294791	100	0.89	SAR	Str	Ca			Cantina-marsupialis	9	0.23659	2	9	0	0	0	0	0	0	0	0	0	0	0	0	0	0	0	0	0	0	0	1	0	0	0	0	0	0	0	0	0	0
OTU829	Euk	SAR	Rhi	Ce	Im	Si_Sphenoderia	KF539410	100	0.96	SAR	Rhi	Ce			Cercozoa-sp	3	0.03751	2	9	0	0	0	0	0	0	0	0	0	0	0	0	0	0	0	0	0	0	0	0	0	0	0	0	0	0	0	0	0	0
OTU1227	Euk	SAR	Rhi	Ce	Im	Si_Sphenoderia	KF539409	100	0.98	SAR	Rhi	Ce	Im	Si	Euglypha-tuberculata	3	0.17593	1	9	0	0	0	0	0	0	0	0	0	0	0	0	0	0	0	0	0	0	0	0	0	0	0	0	0	0	0	0	9	0
OTU1445	Euk	SAR	Str	Oo	La	Ha_Haliphthoros	AB284573	100	0.94	SAR	Str	Bi	Ad		Adriamonas-peritocrescens	3	0.08558	1	9	0	0	0	0	0	0	0	0	0	0	0	0	0	0	0	0	0	0	0	0	0	0	0	0	0	0	0	0	0	0
OTU1070	Euk	SAR	Str	Ba	Ba	Ba_Pinnularia	JN418578	100	0.92	SAR	Str	Bl			Blastocystis-cycluri	4	0.38791	1	9	0	0	0	0	0	0	0	0	0	0	0	0	0	0	0	0	0	0	0	0	0	0	0	0	0	0	0	0	0	0
OTU868	Euk	SAR	Alv	Co	un	_Colpodellidae	GQ411073	100	0.9	SAR	Alv	Co	Co		Colpodella-sp	2	0.26199	1	9	0	0	0	0	0	0	0	0	0	0	0	0	0	0	0	0	0	0	0	0	0	0	0	0	0	0	0	0	0	0
OTU1127	Euk	SAR	Rhi	Ce	Im	Si_Corythion	EF456751	100	0.89	SAR	Rhi	Ce	Gy		Gymnophrys-cometa	3	0.21649	1	9	0	0	0	0	0	0	0	0	0	0	0	0	0	0	0	0	0	0	0	0	0	0	0	0	0	0	0	0	0	0
OTU1348	Euk	SAR	Str	Di	Pe	Ci_Ciliophrys	AB081641	100	0.99	SAR	Str	Di	Pe	Ci	Ciliophrys-infusionum	4	0.03236	1	9	0	0	0	0	0	0	0	0	0	0	0	0	0	0	0	0	0	0	0	0	0	0	0	0	0	0	0	0	0	0
OTU1136	Euk	SAR	Str	Oo	Ol	Ol_Olpidiopsis	KM210530	100	0.99	SAR	Str	Ba	Co	Ch	Chaetoceros-radicans	10	0.13032	1	9	0	0	0	0	0	0	0	0	0	0	0	0	0	0	0	0	0	0	0	0	0	0	0	0	0	0	0	0	0	0
OTU1076	Euk	SAR	Alv	Ap	Co	Co_Goussia	GU479640	100	0.85	SAR	Str	Ba	Ba	Ba	Nitzschia-frigida	4	0.18194	1	9	0	0	0	0	0	0	0	0	0	0	0	0	0	0	0	0	0	0	0	0	0	0	0	0	0	0	0	0	0	0
OTU1110	Euk	SAR	Str	Ba	Co	Rh_Guinardia	KC309536	100	0.97	SAR	Str	Ba	Co	Rh	Proboscia-indica	7	0.12795	8	8	0	0	0	0	0	1	0	0	0	0	0	0	0	0	0	0	0	0	0	0	0	1	0	0	0	1	0	0	0	0
OTU1326	Euk	SAR	Alv	Ci	In	Sp_Strombidium	GU206561	100	0.94	SAR	Alv	Ci	In	Sp	Strombidium-capitatum	6	0.07437	7	8	1	0	0	0	1	0	0	0	0	0	0	0	0	0	0	0	1	0	0	0	0	0	0	1	1	0	0	0	0	0
OTU1257	Euk	SAR	Alv	Ci	In	Pr_Pelagothrix	AB486009	100	0.96	SAR	Alv	Ci	In	Sp	Protocruzia-contrax	5	0.07731	7	8	0	0	0	1	1	0	0	0	0	0	1	0	0	0	0	0	0	0	1	0	0	0	0	1	0	0	0	0	0	0
OTU1583	Euk	SAR	Str	Ba	Co	Ch_Chaetoceros	KT860958	100	0.98	SAR	Str	Ba	Co	Ch	Chaetoceros-radicans	5	0.11192	7	8	0	0	0	0	0	1	0	0	0	0	0	0	0	0	0	0	0	0	0	0	0	0	0	0	0	0	0	2	0	1
OTU1111	Euk	SAR	Str	Ba	Fr	Fr_Licmophora	AY633759	100	0.99	SAR	Str	Ba	Co	Ch	Chaetoceros-muellerii	5	0.0632	6	8	0	0	0	0	0	0	0	0	0	1	0	0	0	0	0	0	0	0	0	0	0	1	0	0	0	0	0	0	0	0
OTU1315	Euk	SAR	Str	Ba	Co	Ch_Chaetoceros	AB430592	100	0.95	SAR	Str	Ba	Co	Ch	Chaetoceros-radicans	3	0.19218	6	8	0	0	0	0	0	0	0	1	0	0	0	0	0	2	0	0	0	0	0	0	0	0	0	0	0	0	0	0	0	2
OTU1659	Euk	SAR	Str	Ba	Ba	Ba_Haslea	AY485488	100	0.95	SAR	Str	Ba	Ba	Ba	Eucocconeis-laevis	3	0.04465	6	8	0	0	0	0	0	0	0	0	0	0	0	1	0	0	0	0	0	0	0	0	0	0	0	0	1	1	0	0	0	0
OTU1820	Euk	SAR	Str	Ba	Co	Th_Shionodiscus	JF794041	100	0.94	SAR	Str	Ol			Olisthodiscus-luteus	3	0.11768	5	8	0	1	0	0	0	0	0	0	0	0	0	0	0	0	0	0	0	0	0	0	0	0	0	1	0	0	0	0	0	0
OTU1342	Euk	SAR	Str	Ch	Ch	Ch_Chrysolepidomonas	AF123297	100	0.99	SAR	Str	Sy	Sy	Ma	Synura-americana	3	0.00078	5	8	0	0	2	0	0	0	1	0	1	0	0	0	0	0	0	0	0	0	0	0	0	0	0	0	0	0	0	0	0	0
OTU1539	Euk	SAR	Str	Ba	Co	Th_Thalassiosira	KU352756	100	0.98	SAR	Str	Ba	Co	Th	Lauderia-borealis	2	0.08975	5	8	0	0	0	0	0	0	0	0	0	0	0	0	0	0	0	0	0	0	0	3	0	0	0	0	0	0	0	0	0	0
OTU1469	Euk	SAR	Str	Ba	Co	Th_Thalassiosira	HM991690	100	0.94	SAR	Str	Ph	Pl	Pl	Pleurochloridella-botrydiopsis	2	0.09841	5	8	0	0	0	0	0	0	0	0	0	1	0	0	0	2	0	0	0	0	0	0	0	0	0	0	1	0	0	0	0	0
OTU1220	Euk	SAR	Rhi	Ce	Pl	Pl_Phagomyxa	AF310903	100	0.95	SAR	Rhi	Ce	Pl	Pl	Plasmodiophora-brassicae	3	0.12537	5	8	0	0	0	0	0	0	0	0	0	0	0	0	0	0	0	0	0	0	0	0	1	0	2	0	0	0	0	0	0	0
OTU1097	Euk	SAR	Alv	Di	Su	Su_Protodinium	JF791031	100	0.99	SAR	Alv	Di	Di	Di	Sinophysis-grandis	2	0.02575	4	8	4	0	0	0	0	0	0	0	0	0	0	0	0	0	0	0	0	0	1	1	0	0	0	0	0	0	0	0	0	0
OTU1060	Euk	SAR	Alv	Ci	In	Na_Zosterodasys	FJ008926	100	0.86	SAR	Alv	Di	Gy	Gy	Cochlodinium-fulvescens	2	0.18304	4	8	0	0	0	0	4	1	0	0	0	0	0	0	0	0	0	0	0	0	0	0	0	0	0	0	0	0	0	0	0	0
OTU1496	Euk	SAR	Alv	Di	Pe	Pf_Pfiesteria-like	AY121856	100	0.99	SAR	Alv	Di	Go	Go	Gonyaulax-verior	2	0.05266	4	8	0	0	0	0	0	0	0	0	0	0	0	0	0	1	0	0	0	0	0	2	0	0	0	0	0	0	0	0	0	0
OTU1249	Euk	SAR	Str	Di	Di	Vi_Vicicitus	HQ646558	100	0.98	SAR	Str	Ch	Ch	Ch	Chrysocapsa-sp	2	0.06867	4	8	0	0	0	0	0	0	0	0	2	0	1	0	0	0	0	0	0	0	0	0	0	0	0	0	0	0	2	0	0	0
OTU1034	Euk	SAR	Alv	Ci	In	Sp_Aspidisca	JX025168	100	0.96	SAR	Alv	Ci	In	Sp	Aspidisca-steini	2	0.02891	4	8	0	0	0	0	0	0	0	0	0	2	0	0	0	0	0	0	0	0	0	0	0	0	0	0	1	0	0	0	0	0
OTU1296	Euk	SAR	Str	Hy	Rh	Rh_Rhizidiomyces	JF791062	100	0.99	SAR	Str	Hy	Rh	Rh	Rhizidiomyces-apophysatus	3	0.07074	3	8	0	0	0	0	0	0	2	0	0	0	0	0	0	0	5	0	0	0	0	0	0	0	0	0	0	0	0	0	0	0
OTU1199	Euk	SAR	Str	Ba	Co	Co_Stictocyclus	KC309507	100	0.83	SAR	Rhi	Ce	Va	Va	Penardia-sp	8	0.39479	2	8	0	0	0	0	0	5	0	0	0	0	0	0	0	0	0	0	0	0	0	0	0	0	0	0	0	0	0	0	0	0
OTU1652	Euk	SAR	Rhi	Ce	Im	Si_Thaumatomonas	HQ121429	100	0.91	SAR	Rhi	Ce	Th	Ch	Rhogostoma-minus	4	0.19	2	8	0	0	0	0	0	0	0	0	0	0	0	0	0	0	0	0	0	0	0	0	0	0	0	0	0	0	0	0	0	0
OTU951	Euk	SAR	Rhi	Ce	Im	Si_Euglypha	AJ418782	100	0.89	SAR	Rhi	Ce	Im	Si	Trachelocorythion-pulchellum	6	0.21374	2	8	0	0	0	0	0	0	0	0	0	0	0	0	0	0	0	0	0	0	0	0	0	0	0	0	0	0	0	0	0	0
OTU1092	Euk	SAR	Alv	Ci	In	Sp_Protocruzia	DQ190467	100	0.98	SAR	Alv	Ci	In	Sp	Protocruzia-contrax	2	0.02126	2	8	0	0	0	0	0	0	0	0	0	0	0	0	0	0	0	0	0	0	0	0	0	0	0	0	0	0	0	0	0	0
OTU1392	Euk	SAR	Rhi	Ce	Ce	He_Allantion	HQ918169	100	0.99	SAR	Rhi	Ce	Ce	He	Allantion-sp	4	0.024	1	8	8	0	0	0	0	0	0	0	0	0	0	0	0	0	0	0	0	0	0	0	0	0	0	0	0	0	0	0	0	0
OTU1535	Euk	SAR	Str	La	Th	Ob_Oblongichytrium	AB973534	100	0.91	SAR	Alv	Ac			Acavomonas-peruviana	3	0.21754	1	8	0	0	8	0	0	0	0	0	0	0	0	0	0	0	0	0	0	0	0	0	0	0	0	0	0	0	0	0	0	0
OTU1394	Euk	SAR	Rhi	Ce	Im	Si_Euglypha	AJ418788	100	0.95	SAR	Rhi	Ce			Auranticordis-quadriverberis	9	0.1695	1	8	0	0	0	8	0	0	0	0	0	0	0	0	0	0	0	0	0	0	0	0	0	0	0	0	0	0	0	0	0	0
OTU1293	Euk	SAR	Rhi	Ce	Im	Si_Tracheleuglypha	AJ418790	100	0.89	SAR	Rhi	Ce	Gy		Gymnophrys-cometa	4	0.29219	1	8	0	0	0	0	8	0	0	0	0	0	0	0	0	0	0	0	0	0	0	0	0	0	0	0	0	0	0	0	0	0
OTU1019	Euk	SAR	Alv	Ci	In	Ol_Cinetochilum	FJ870103	100	0.98	SAR	Alv	Ci	In	Ol	Cinetochilum-ovale	3	0.02754	1	8	0	0	0	0	0	0	0	0	0	0	0	0	0	0	0	0	0	0	0	0	0	0	0	0	0	0	0	0	0	0
OTU1185	Euk	SAR	Alv	Ci	In	Ol_Entodiscus	AY541687	100	0.91	SAR	Alv	Ci	In	Ol	Entodiscus-borealis	4	0.1675	1	8	0	0	0	0	0	0	0	0	0	0	0	0	0	0	0	0	0	0	0	8	0	0	0	0	0	0	0	0	0	0
OTU1312	Euk	SAR	Alv	Ci	In	Sp_Aspidisca	EF123704	100	0.87	SAR	Alv	Ci	In	Sp	Aspidisca-fusca	2	0.18628	1	8	0	0	0	0	0	0	0	0	0	0	0	0	0	0	0	0	0	0	0	8	0	0	0	0	0	0	0	0	0	0
OTU1063	Euk	SAR	Rhi	Ce	Ce	Ce_Cercomonas	AY748806	100	0.91	SAR	Rhi	Ce	As	Ha	Haplosporidium-tuxtlensis	6	0.72531	1	8	0	0	0	0	0	0	0	0	0	0	0	0	0	0	0	0	0	0	0	0	0	0	0	8	0	0	0	0	0	0
OTU1502	Euk	SAR	Str	Ba	Fr	Fr_Grammatophora	AF525656	100	0.9	SAR	Str	Sy	Rh	My	Chlamydomyxa-labyrinthuloides	2	0.233	1	8	0	0	0	0	0	0	0	0	0	0	0	0	0	0	0	0	0	0	0	0	0	0	0	0	0	8	0	0	0	0
OTU1506	Euk	SAR	Alv	Ci	In	Sp_Parabirojimia	FJ156104	100	0.94	SAR	Alv	Ci	In	Sp	Apogastrostyla-rigescens	3	0.07935	1	8	0	0	0	0	0	0	0	0	0	0	0	0	0	0	0	0	0	0	0	0	0	0	0	0	0	0	0	0	0	0
OTU1192	Euk	SAR	Str	Ba	Ba	Ba_Hantzschia	KM116109	100	0.99	SAR	Str	Ba	Co	Th	Thalassiosira-mala	5	0.05359	1	8	0	0	0	0	0	0	0	0	0	0	0	0	0	0	0	0	0	0	0	0	0	0	0	0	0	0	0	0	0	0
OTU1198	Euk	SAR	Str	Ch	Ch	Ch_Chrysoxys	AF123302	100	0.99	SAR	Str	Sy	Sy	Ma	Synura-americana	4	0.00078	1	8	0	0	0	0	0	0	0	0	0	0	0	0	0	0	0	0	0	0	0	0	0	0	0	0	0	0	0	0	0	0
OTU1164	Euk	SAR	Str	La	Th	Au_Aurantiochytrium	DQ367049	100	0.82	SAR	Rhi	Ce	Ce	Sa	Sainouron-acronematica	3	0.6402	1	8	0	0	0	0	0	0	0	0	0	0	0	0	0	0	0	0	0	0	0	0	0	0	0	0	0	0	0	0	0	0
OTU1402	Euk	SAR	Rhi	Ce	Th	Le_Lecythium	KP728379	100	0.98	SAR	Rhi	Ce	Th		Mataza-hastifera	4	0.07472	1	8	0	0	0	0	0	0	0	0	0	0	0	0	0	0	0	0	0	0	0	0	0	0	0	0	0	0	0	0	0	0
OTU1209	Euk	SAR	Alv	Ci	In	Ol_Miamiensis	JN885091	100	0.96	SAR	Alv	Ci	In	Ol	Entorhipidium-tenue	3	0.00073	1	8	0	0	0	0	0	0	0	0	0	0	0	0	0	0	0	0	0	0	0	0	0	0	0	0	0	0	0	0	0	0
OTU1211	Euk	SAR	Str	Ba	Ba	Ba_Navicula	KT072983	100	0.96	SAR	Str	Eu	Eu	Ps	Pseudocharaciopsis-ovalis	2	0.15101	1	8	0	0	0	0	0	0	0	0	0	0	0	0	0	0	0	0	0	0	0	0	0	0	0	0	0	0	0	0	0	0
OTU1357	Euk	SAR	Rhi	Ce	Va	Va_Penardia	KC779511	100	0.94	SAR	Rhi	Ce	Va	Va	Penardia-sp	3	0.28449	1	8	0	0	0	0	0	0	0	0	0	0	0	0	0	0	0	0	0	0	0	0	0	0	0	0	0	0	0	0	0	0
OTU1213	Euk	SAR	Str	Ba	Ba	Ba_Pinnularia	AM743096	100	0.93	SAR	Rhi	Ce	Ce	Ce	Paracercomonas-astra	5	0.04581	1	8	0	0	0	0	0	0	0	0	0	0	0	0	0	0	0	0	0	0	0	0	0	0	0	0	0	0	0	0	0	0
OTU1188	Euk	SAR	Str	Ba	Ba	Ba_Gyrosigma	KM999005	100	0.96	SAR	Str	Ba	Fr	Fr	Licmophora-remulus	7	0.08609	6	7	0	0	0	0	0	1	0	0	0	0	0	0	0	0	0	0	0	0	0	0	0	1	0	0	0	0	0	2	0	0
OTU1570	Euk	SAR	Alv	Ci	In	Sp_Strombidium	KP260510	100	0.98	SAR	Alv	Ci	In	Sp	Strombidium-capitatum	4	0.11411	6	7	0	0	0	0	0	0	1	0	0	0	0	0	0	0	0	1	0	0	0	0	0	0	0	0	0	0	0	0	2	0
OTU1274	Euk	SAR	Rhi	Ce	Im	Ma_Abollifer	LC006124	100	0.96	SAR	Rhi	Ce	Im	Ma	Abollifer-globosa	3	0.08408	6	7	0	0	0	0	0	0	1	0	0	0	0	0	0	0	1	0	0	0	0	0	0	0	0	0	0	0	0	0	0	0
OTU1256	Euk	SAR	Str	Pe	Pe	Pe_Pelagomonas	KT861109	100	0.95	SAR	Str	Ba	Fr	Fr	Licmophora-grandis	10	0.1389	6	7	0	0	0	0	0	0	0	0	1	0	0	0	0	0	0	0	0	0	1	0	0	0	0	0	0	0	0	0	0	1
OTU1692	Euk	SAR	Rhi	Ce	Ce	Ce_Paracercomonas	FJ790724	100	0.97	SAR	Rhi	Ce	Ce	Ce	Paracercomonas-oxoniensis	3	0.06295	6	7	0	0	0	0	0	0	0	0	0	0	0	0	0	0	0	0	0	1	0	0	0	0	0	0	0	1	0	0	0	0
OTU1278	Euk	SAR	Rhi	Ce	Im	Si_Protaspis	FJ824125	100	0.97	SAR	Rhi	Ce	Ce	He	Allantion-sp	6	0.04353	6	7	0	0	0	0	0	0	0	0	0	0	0	0	0	0	0	0	0	0	0	0	0	0	0	0	0	0	0	0	0	0
OTU1489	Euk	SAR	Alv	Ci	In	Sp_Strombidium	KJ737432	100	0.94	SAR	Alv	Ci	In	Sp	Strombidium-capitatum	16	0.15807	5	7	2	0	0	0	0	0	0	0	0	0	0	0	0	0	0	0	0	1	0	0	0	0	0	0	0	0	0	0	0	0
OTU1143	Euk	SAR	Str	Ba	Me	Bi_Terpsinoe	KJ577872	100	0.95	SAR	Str	Ba	Co	Ch	Chaetoceros-muellerii	8	0.16455	5	7	0	0	0	0	0	0	0	0	0	0	0	0	0	2	0	1	0	0	0	0	0	0	0	0	0	0	0	0	0	0
OTU1308	Euk	SAR	Str	Di	Pe	Ap_Apedinella	HQ710559	100	0.95	SAR	Str	Di	Rh	Rh	Rhizochromulina-cf	5	0.17301	5	7	0	0	0	3	0	0	0	0	0	0	0	0	0	0	0	0	0	0	0	0	0	0	0	0	0	1	1	0	0	0
OTU1084	Euk	SAR	Alv	Di	Sy	Am_Amoebophrya	AY775284	100	0.93	SAR	Alv	Di	Sy	Am	Amoebophrya-sp	5	0.17979	5	7	0	0	0	0	0	0	0	0	0	0	0	0	0	0	0	0	0	0	0	0	1	0	0	0	0	1	0	0	0	0
OTU1305	Euk	SAR	Str	Oo	My	Eu_Eurychasma	AB368176	100	0.94	SAR	Str	Ba	Fr	Fr	Licmophora-grandis	11	0.09569	5	7	0	0	0	0	0	2	0	0	0	0	0	0	0	0	0	0	0	0	0	0	0	0	0	0	0	0	0	1	0	0
OTU1263	Euk	SAR	Str	PX	Xa	Mi_Chlorellidium	FJ030892	100	0.97	SAR	Str	Sc			Schizocladia-ischiensis	4	0.05661	5	7	0	0	0	0	0	0	0	0	0	0	0	0	0	0	0	0	0	1	2	1	0	0	0	0	0	0	0	0	0	0
OTU1457	Euk	SAR	Rhi	Ce	Th	Le_Lecythium	KP728379	100	0.96	SAR	Rhi	un			Dimorpha-like-sp	3	0.03946	4	7	2	0	0	0	1	0	0	0	0	0	0	0	0	0	0	0	0	0	0	0	0	0	0	0	0	0	0	0	0	0
OTU786	Euk	SAR	Str	Ba	Ba	Ba_Navicula	GQ219689	100	0.86	SAR	Rhi	Ce	Th	Ch	Rhogostoma-minus	13	0.34281	4	7	0	0	0	0	0	0	0	0	0	0	0	0	0	0	2	0	0	0	0	0	0	0	0	0	0	0	0	0	0	0
OTU895	Euk	SAR	Str	Ba	un	_Peridiniopsis	AB353773	100	0.92	SAR	Str	Ba	Ba	Ba	Amphora-commutata	8	0.08425	4	7	0	0	0	0	0	0	0	0	0	0	0	0	0	0	0	0	0	0	0	2	0	0	0	0	0	0	0	0	1	0
OTU1534	Euk	SAR	Str	Ba	Co	Co_Corethron	KC309527	100	0.98	SAR	Str	Ba	Co	Co	Corethron-sp	4	0.06532	3	7	0	0	5	0	0	0	0	0	0	0	0	0	1	0	0	0	0	0	0	0	0	0	0	0	0	0	0	0	0	0
OTU1661	Euk	SAR	Rhi	Ce	Im	Si_Placocista	GQ144680	100	0.91	SAR	Rhi	Ce	Ce	Ce	Massisteria-marina	3	0.15745	3	7	0	0	0	1	0	0	0	0	0	0	4	0	0	0	0	0	0	0	0	0	0	0	0	0	0	0	0	0	0	0
OTU1172	Euk	SAR	Alv	Di	Gy	Gy_Gyrodinium	AB120001	100	0.98	SAR	Alv	Di	Gy	Gy	Gyrodinium-cf	4	0.06182	3	7	0	0	0	0	0	5	0	0	0	0	0	0	0	0	0	0	0	0	0	1	0	0	0	0	0	0	0	0	0	0
OTU1177	Euk	SAR	Str	La	Th	La_Labyrinthuloides	AF265339	100	0.92	SAR	Str	Bi	Bi	Bi	Bicosoeca-petiolata	2	0.10508	3	7	0	0	0	0	0	0	0	0	1	0	0	0	0	3	0	0	0	0	0	0	0	0	0	0	0	0	0	0	0	3
OTU1106	Euk	SAR	Alv	Ci	In	Pr_Plagiopogon	KC771342	100	0.95	SAR	Alv	Ci	In	Na	Discotricha-papillifera	5	0.24302	3	7	0	0	0	0	0	0	0	0	0	0	0	0	0	0	0	0	0	3	0	0	0	0	3	0	0	1	0	0	0	0
OTU1325	Euk	SAR	Rhi	Ce		_Cercozoan	DQ666485	100	0.9	SAR	Rhi	Ac	Sy	Am	Amphibelone-cultellata	4	0.24027	3	7	0	0	0	0	0	0	0	0	0	0	0	0	0	0	0	0	0	0	0	0	2	0	0	0	0	1	0	0	0	0
OTU1194	Euk	SAR	Rhi	Ce	Th	Tr_Trachyrhizium	LC125926	100	0.94	SAR	Rhi	Ce	Th	Tr	Trachyrhizium-urniformis	4	0.09486	3	7	0	0	0	0	0	0	0	0	0	0	0	0	0	0	0	0	0	0	0	0	0	0	0	0	0	0	0	0	0	0
OTU1053	Euk	SAR	Str	Ba	Fr	Fr_Synedra	EF491890	100	1	SAR	Str	Ba	Fr	Fr	Grammonema-sp	6	0	3	7	0	0	0	0	0	0	0	0	0	0	0	0	0	0	0	0	0	0	0	0	0	0	0	0	0	0	0	0	0	0
OTU1383	Euk	SAR	Rhi	Ce	Im	Si_Euglypha	KT232134	100	0.95	SAR	Rhi	Ce	Im	Ma	Pseudopirsonia-mucosa	11	0.08253	3	7	0	0	0	0	0	0	0	0	0	0	0	0	0	0	0	0	0	0	0	0	0	0	0	0	0	0	0	0	0	0
OTU1417	Euk	SAR	Rhi	Ce		_Cercozoa	FJ919772	100	0.89	SAR	Rhi	Ce	Im	Si	Cyphoderia-major	7	0.242	2	7	0	0	1	0	0	0	0	0	0	0	0	0	0	0	0	0	0	0	0	6	0	0	0	0	0	0	0	0	0	0
OTU1134	Euk	SAR	Str	Ba	Fr	Fr_Fragilaria	KF959661	100	0.99	SAR	Str	Ba	Fr	Fr	Fragilaria-rumpens	2	0.00076	2	7	0	0	0	0	1	0	0	0	0	6	0	0	0	0	0	0	0	0	0	0	0	0	0	0	0	0	0	0	0	0
OTU1245	Euk	SAR	Rhi	Ce	Im	Si_Ovulinata	HQ121432	100	0.98	SAR	Rhi	Ce	Im	Si	Ovulinata-parva	3	0.02254	2	7	0	0	0	0	0	6	0	0	0	0	0	0	0	0	0	0	0	0	0	0	0	0	0	0	0	0	0	0	0	0
OTU1275	Euk	SAR	Str	Ba	Ba	Ba_Epithemia	HQ912410	100	0.95	SAR	Str	Ba	Me	Bi	Terpsinoe-musica	2	0.14846	2	7	0	0	0	0	0	0	0	0	0	0	0	0	0	0	0	0	0	0	0	0	0	0	0	0	0	0	0	0	0	0
OTU1190	Euk	SAR	Alv	Ci	In	Ol_Pseudovorticella	DQ845295	100	1	SAR	Alv	Ci	In	Ol	Pseudovorticella-paracratera	2	0.00331	2	7	0	0	0	0	0	0	0	0	0	0	0	0	0	0	0	0	0	0	0	0	0	0	0	0	0	0	0	0	0	0
OTU1159	Euk	SAR	Alv	Di	Sy	Am_Amoebophrya	AY775284	100	0.92	SAR	Alv	Di	Sy	Am	Amoebophrya-sp	4	0.20037	2	7	0	0	0	0	0	0	0	0	0	0	0	0	0	0	0	0	0	0	0	0	0	0	0	0	0	0	0	0	0	0
OTU1252	Euk	SAR	Rhi	Ce	Im	Si_Thaumatomastigidae	KC243117	100	0.97	SAR	Rhi	Ce	Im	Si	Thaumatomonas-sp	6	0.04018	2	7	0	0	0	0	0	0	0	0	0	0	0	0	0	0	0	0	0	0	0	0	0	0	0	0	0	0	0	0	0	0
OTU1138	Euk	SAR	Alv	Di	To	To_Torodinium	KR139783	100	0.93	SAR	Alv	Di	Ph	Ph	Phytodinium-sp	3	0.12058	2	7	0	0	0	0	0	0	0	0	0	0	0	0	0	0	0	0	0	0	0	0	0	0	0	0	0	0	0	0	0	0
OTU1408	Euk	SAR	Rhi	Ce	Im	Si_Euglypha	EF456754	100	0.94	SAR	Rhi	Ce	Im	Si	Sphenoderia-macrolepis	3	0.05089	2	7	0	0	0	0	0	0	0	0	0	0	0	0	0	0	0	0	0	0	0	0	0	0	0	0	0	0	0	0	0	0
OTU1338	Euk	SAR	Alv	Di	Pe	Di_Diplopsalis	KJ995958	100	0.99	SAR	Alv	Di	un	St	Stoeckeria-algicida	2	0.03389	1	7	0	0	7	0	0	0	0	0	0	0	0	0	0	0	0	0	0	0	0	0	0	0	0	0	0	0	0	0	0	0
OTU1288	Euk	SAR	Rhi	Ce		_Cercozoan	DQ666485	100	0.91	SAR	Rhi	Ce	Th	Tr	Trachyrhizium-urniformis	6	0.1261	1	7	0	0	0	0	0	7	0	0	0	0	0	0	0	0	0	0	0	0	0	0	0	0	0	0	0	0	0	0	0	0
OTU1416	Euk	SAR	Rhi	Ce	Im	Si_Sphenoderia	KF539410	100	0.94	SAR	Rhi	Ce	Im	Si	Cyphoderia-major	8	0.17763	1	7	0	0	0	0	0	0	0	0	0	0	0	0	0	0	0	0	7	0	0	0	0	0	0	0	0	0	0	0	0	0
OTU1310	Euk	SAR	Str	Ba	Co	Ch_Leptocylindrus	KC309538	100	0.99	SAR	Str	Ba	Co	Ch	Leptocylindrus-minimus	3	0.07053	1	7	0	0	0	0	0	0	0	0	0	0	0	0	0	0	0	0	7	0	0	0	0	0	0	0	0	0	0	0	0	0
OTU1365	Euk	SAR	Rhi	Ce	Th	Eb_Ebria	DQ303923	100	0.93	SAR	Str	Oo	Sa	Sa	Leptolegnia-sp	3	0.07016	1	7	0	0	0	0	0	0	0	0	0	0	0	0	0	0	0	0	0	0	0	7	0	0	0	0	0	0	0	0	0	0
OTU1500	Euk	SAR	Alv	Ci	In	Ol_Myxophyllum	JQ956547	100	0.99	SAR	Alv	Ci	In	Ol	Parauronema-longum	2	0.0217	1	7	0	0	0	0	0	0	0	0	0	0	0	0	0	0	0	0	0	0	0	0	7	0	0	0	0	0	0	0	0	0
OTU1319	Euk	SAR	Alv	Ci	In	Pr_Pelagothrix	AB486009	100	0.94	SAR	Alv	Ci	un	Cr	Cryptocaryon-irritans	3	0.10502	1	7	0	0	0	0	0	0	0	0	0	0	0	0	0	0	0	0	0	0	0	0	0	0	0	0	0	0	0	0	0	0
OTU1090	Euk	SAR	Str	Bi	un	Ha_Halocafeteria	KF545980	100	0.91	SAR	Str	Bi	un	Ha	Halocafeteria-seosinensis	3	0.21448	1	7	0	0	0	0	0	0	0	0	0	0	0	0	0	0	0	0	0	0	0	0	0	0	0	0	0	0	0	0	0	0
OTU1231	Euk	SAR	Alv	Co	un	_Colpodellidae	GQ411073	100	0.91	SAR	Alv	Co	un		Colpodellidae-sp	2	0.19956	1	7	0	0	0	0	0	0	0	0	0	0	0	0	0	0	0	0	0	0	0	0	0	0	0	0	0	0	0	0	0	0
OTU1516	Euk	SAR	Rhi	Ce	Im	Si_Thaumatomastigidae	KC243117	100	0.85	SAR	Rhi	Ce	Ce	Sa	Cholamonas-cyrtodiopsidis	3	0.4021	1	7	0	0	0	0	0	0	0	0	0	0	0	0	0	0	0	0	0	0	0	0	0	0	0	0	0	0	0	0	0	0
OTU1382	Euk	SAR	Alv	Di	Gy	Ka_Takayama	JF790995	100	0.91	SAR	Alv	Di	Gy	Ka	Takayama-cf	4	0.16634	1	7	0	0	0	0	0	0	0	0	0	0	0	0	0	0	0	0	0	0	0	0	0	0	0	0	0	0	0	0	0	0
OTU954	Euk	SAR	Str	Bi	un	Ha_Halocafeteria	KF545980	100	0.91	SAR	Str	Bi	un	Ha	Halocafeteria-seosinensis	4	0.2582	1	7	0	0	0	0	0	0	0	0	0	0	0	0	0	0	0	0	0	0	0	0	0	0	0	0	0	0	0	0	0	0
OTU1232	Euk	SAR	Str	Ba	Ba	Ba_Psammothidium	KM116122	100	0.96	SAR	Str	Ba	Co	Th	Thalassiosira-mala	11	0.115	1	7	0	0	0	0	0	0	0	0	0	0	0	0	0	0	0	0	0	0	0	0	0	0	0	0	0	0	0	0	0	0
OTU1051	Euk	SAR	Str	Ba	Co	Co_Melosira	KF915810	100	0.83	SAR	Str	Hy	Rh	Rh	Rhizidiomyces-apophysatus	3	0.52869	1	7	0	0	0	0	0	0	0	0	0	0	0	0	0	0	0	0	0	0	0	0	0	0	0	0	0	0	0	0	0	0
OTU1035	Euk	SAR	Str	Ba	Ba	Ba_Cymbella	JN033248	100	0.98	SAR	Str	Ba	Ba	Ba	Hantzschia-sp	3	0.02469	1	7	0	0	0	0	0	0	0	0	0	0	0	0	0	0	0	0	0	0	0	0	0	0	0	0	0	0	0	0	0	0
OTU1303	Euk	SAR	Alv	Ci	In	Li_Lacrymariidae	LN869967	100	0.97	SAR	Alv	Ci	In	Li	Lacrymariidae-sp	4	0.05567	1	7	0	0	0	0	0	0	0	0	0	0	0	0	0	0	0	0	0	0	0	0	0	0	0	0	0	0	0	0	0	0
OTU1410	Euk	SAR	Rhi	Ce	Im	Si_Euglypha	EF456755	100	0.93	SAR	Rhi	Ce	Ce	Ce	Massisteria-sp	3	0.20022	1	7	0	0	0	0	0	0	0	0	0	0	0	0	0	0	0	0	0	0	0	0	0	0	0	0	0	0	0	0	0	0
OTU1361	Euk	SAR	Rhi	Ce	Im	Si_Thaumatomonas	HQ121429	100	0.9	SAR	Rhi	Ce	Ce	Ce	Massisteria-sp	5	0.14886	1	7	0	0	0	0	0	0	0	0	0	0	0	0	0	0	0	0	0	0	0	0	0	0	0	0	0	0	0	0	0	0
OTU1259	Euk	SAR	Str	Ch	Ch	Ch_Ochromonas	EU024995	100	0.96	SAR	Str	Ba	Fr	Fr	Licmophora-grandis	7	0.09569	6	6	0	0	0	0	1	0	0	1	0	0	0	0	0	1	0	0	0	0	0	0	0	1	0	0	0	0	0	0	0	0
OTU1254	Euk	SAR	Str	PX	Xa	Mi_Botryochloris	AJ579341	100	0.95	SAR	Str	Bl			Blastocystis-cycluri	6	0.37088	6	6	0	0	0	0	0	0	0	0	0	0	0	0	0	0	0	0	0	0	0	0	0	0	0	0	0	0	0	0	0	0
OTU2070	Euk	SAR	Alv	Ci	In	Li_Askenasia	EU024989	100	0.96	SAR	Alv	Ci	In	Ol	Parauronema-virginianum	2	0.37062	5	6	0	0	0	0	1	0	0	0	0	0	0	0	1	0	0	0	1	0	0	0	0	0	0	0	0	0	2	0	0	0
OTU1261	Euk	SAR	Alv	Co	Co	_Colponema	KJ598081	100	0.95	SAR	Rhi	Ce	Im	Si	Euglypha-tuberculata	4	0.23555	5	6	0	0	0	0	0	1	1	0	0	1	0	0	0	0	2	0	0	0	0	0	0	0	0	0	0	0	0	0	0	0
OTU1462	Euk	SAR	Str	Ba	Co	Ch_Chaetoceros	KT860959	100	0.94	SAR	Str	Ba	Fr	Fr	Licmophora-remulus	18	0.1787	5	6	0	0	0	0	0	1	0	0	0	0	0	0	0	0	0	1	0	0	0	0	0	0	0	2	0	0	0	0	0	1
OTU1268	Euk	SAR	Alv	Di	Gy	Po_Polykrikos	EU418966	100	0.96	SAR	Alv	Di	Co	Ch	Chytriodinium-affine	2	0.10015	5	6	0	0	0	0	0	0	0	1	0	0	0	0	0	0	0	0	0	0	1	0	0	0	0	0	0	0	0	0	0	0
OTU1573	Euk	SAR	Str	Ch	Ch	Di_Dinobryon	EU024980	100	0.94	SAR	Str	Ba	Fr	Fr	Licmophora-grandis	8	0.1389	5	6	0	0	0	0	0	0	0	0	0	0	2	0	0	0	1	0	1	0	0	0	0	0	0	1	0	0	0	0	0	0
OTU1118	Euk	SAR	Alv	Ci	In	Sp_Strombidium	KJ737432	100	0.94	SAR	Alv	Ci	In	Sp	Oligotrichia-sp	3	0.18961	4	6	0	0	1	0	0	0	0	0	0	0	0	0	0	0	0	0	0	0	0	0	0	0	0	1	0	0	0	0	0	2
OTU1184	Euk	SAR	Alv	Di	un	_Dinophyta	LC054950	100	0.88	SAR	Alv	Di	Pe	Oo	Oodinium-pouchetii	3	0.36718	4	6	0	0	0	1	0	0	0	0	0	0	0	0	0	0	1	0	0	0	0	0	0	0	0	0	0	0	0	0	0	0
OTU1424	Euk	SAR	Rhi	Ce	Pl	Pl_Phagomyxa	AF310903	100	0.95	SAR	Rhi	Ce	Pl	Pl	Plasmodiophora-brassicae	3	0.12474	4	6	0	0	0	0	0	0	0	0	0	0	0	0	0	0	0	0	0	0	0	0	0	0	0	0	0	3	0	0	0	0
OTU1341	Euk	SAR	Str	Pi		_Pirsonia	AJ561113	100	0.87	SAR	Str	Ba	Fr	Fr	Licmophora-remulus	16	0.16076	4	6	0	0	0	0	0	0	0	2	0	0	0	0	0	0	0	0	0	1	2	0	0	0	0	0	0	0	0	0	0	0
OTU2112	Euk	SAR	Str	Di	Pe	Ap_Apedinella	HQ710559	100	0.97	SAR	Str	Di	Rh	Rh	Rhizochromulina-cf	7	0.08545	4	6	0	0	0	0	0	0	0	0	0	0	0	0	0	0	0	0	0	0	0	0	0	0	2	0	0	1	0	0	0	0
OTU1344	Euk	SAR	Alv	Ci	In	Sp_Strombidium	KP260510	100	0.94	SAR	Alv	Ci	In	Sp	Strombidium-capitatum	3	0.20804	4	6	0	0	0	0	0	0	0	0	0	1	0	0	0	0	0	0	0	0	0	0	0	0	0	0	0	0	0	1	0	2
OTU645	Euk	SAR	Str	Ba	Ba	Ba_Navicula	KF417683	100	0.96	SAR	Str	Bl			Blastocystis-cycluri	5	0.35397	4	6	0	0	0	0	0	0	1	0	0	0	0	0	0	0	0	0	0	0	0	0	0	0	0	0	0	0	0	0	0	0
OTU1980	Euk	SAR	Str	Ba	Ba	Ba_Navicula	KT072983	100	0.98	SAR	Rhi	Ce	Ce	Sa	Sainouron-acronematica	4	0.47239	4	6	0	0	0	0	0	0	0	3	0	0	0	0	0	0	0	0	0	0	0	0	0	0	0	0	0	0	0	0	0	0
OTU1313	Euk	SAR	Alv	Ci	In	Pr_Pelagothrix	AB486009	100	0.97	SAR	Alv	Ci	In	Pr	Prorodon-viridis	4	0.06731	4	6	0	0	0	0	0	0	0	1	0	0	0	0	0	0	0	0	0	0	0	3	0	0	0	1	0	0	0	0	0	0
OTU1563	Euk	SAR	Str	Di	Di	Di_Dictyocha	U14385	100	0.87	SAR	Alv	Ci	In	Sp	Protocruzia-contrax	4	0.12903	4	6	0	0	0	0	0	0	0	0	0	0	2	0	0	0	0	0	2	0	0	0	0	0	0	0	0	0	0	0	0	0
OTU1217	Euk	SAR	Str	Ch	Ch	Di_Dinobryon	EU024980	100	0.96	SAR	Str	Ba	Fr	Fr	Licmophora-grandis	9	0.09569	4	6	0	0	0	0	0	0	0	0	0	0	0	0	2	0	0	1	0	0	0	0	0	0	0	0	0	0	0	1	0	0
OTU915	Euk	SAR	Str	Ba	Co	Co_Podosira	HQ912567	100	1	SAR	Str	Ba	Co	Co	Podosira-stelligera	2	0.04794	4	6	0	0	0	0	0	0	0	0	0	0	0	0	0	2	0	0	0	0	0	0	0	0	0	0	2	0	0	0	0	0
OTU1224	Euk	SAR	Alv	Co	Co	_Colponema	KJ598081	100	0.89	SAR	Rhi	Ce	Ph	Ph	Challengeron-willemoesii	2	0.48189	4	6	0	0	0	0	0	0	0	0	0	0	0	0	0	0	0	0	0	0	0	0	0	0	0	0	1	0	2	0	0	0
OTU579	Euk	SAR	Alv	Ci	In	Sp_Strombidinopsis	KR263893	100	0.96	SAR	Alv	Ci	In	Sp	Strobilidium-sp	3	0.17871	4	6	0	0	0	0	0	0	0	0	0	0	0	0	0	0	0	0	0	0	0	0	0	0	0	0	0	0	0	0	0	0
OTU1412	Euk	SAR	Alv	Ci	In	Sp_Strombidium	JF791016	100	0.98	SAR	Alv	Ci	In	Sp	Strombidium-capitatum	19	0.05425	3	6	0	0	0	0	0	0	0	0	0	0	2	0	0	0	0	0	0	0	0	0	0	0	0	0	0	0	0	0	0	0
OTU818	Euk	SAR	Str	La	Th	La_Labyrinthuloides	AF265339	100	0.99	SAR	Str	La	Th	Ap	Aplanochytrium-sp	3	0.00219	3	6	0	0	0	0	0	0	0	0	0	0	0	0	0	0	0	0	0	0	0	0	0	0	0	0	0	0	0	0	0	0
OTU1373	Euk	SAR	Str	Di	Pe	Ps_Pseudopedinella	HQ710560	100	0.96	SAR	Str	Di	Rh	Rh	Rhizochromulina-cf	5	0.0858	3	6	0	0	0	0	2	0	0	0	0	0	0	0	0	0	0	0	0	0	0	0	0	0	0	0	0	0	0	0	0	0
OTU1139	Euk	SAR	Rhi	Ce	Im	Si_Euglypha	AJ418782	100	0.91	SAR	Rhi	Ce	Im	Si	Euglypha-tuberculata	5	0.17408	3	6	0	0	0	0	0	2	0	0	0	0	0	0	0	0	0	0	0	0	0	0	0	0	0	0	0	0	0	0	0	0
OTU1370	Euk	SAR	Str	Di	Pe	Ap_Apedinella	HQ710559	100	0.96	SAR	Str	Di	Rh	Rh	Rhizochromulina-cf	6	0.10605	3	6	0	0	0	0	0	0	0	2	0	0	0	0	0	0	0	0	0	0	0	0	0	0	0	0	0	3	0	0	0	0
OTU1294	Euk	SAR	Str	Ba	Co	Th_Cyclotella	AY485499	100	0.97	SAR	Str	Ba	Co	Th	Thalassiosira-anguste-lineata	4	0.22795	3	6	0	0	0	0	0	0	0	3	0	0	0	0	0	0	0	0	0	0	0	0	0	0	0	1	0	0	0	0	0	0
OTU1248	Euk	SAR	Alv	Ci	In	Co_Sorogena	AF300286	100	0.85	SAR	Str	Ba	Ba	Ba	Frustulia-aotearoa	3	0.11464	3	6	0	0	0	0	0	0	0	0	3	0	0	0	0	0	0	0	0	0	0	0	0	0	0	0	0	0	0	0	2	0
OTU1276	Euk	SAR	Str	Ba	Ba	Ba_Biremis	KJ961678	100	0.97	SAR	Str	Ba	Fr	Fr	Astrosyne-radiata	2	0.07087	3	6	0	0	0	0	0	0	0	0	0	0	0	0	0	2	0	0	0	0	0	0	0	0	0	0	0	0	0	0	0	0
OTU1414	Euk	SAR	Str	Ba	Ba	Ba_Tryblionella	HQ912600	100	0.97	SAR	Str	Ba	Co	Th	Thalassiosira-mala	6	0.07306	3	6	0	0	0	0	0	0	0	0	0	0	0	0	0	3	0	0	0	0	0	0	0	0	0	0	0	0	0	0	0	0
OTU1205	Euk	SAR	Alv	Di	Sy	Am_Amoebophrya	AY775284	100	0.95	SAR	Alv	Di	Sy	Am	Amoebophrya-sp	3	0.15625	2	6	2	0	0	4	0	0	0	0	0	0	0	0	0	0	0	0	0	0	0	0	0	0	0	0	0	0	0	0	0	0
OTU1243	Euk	SAR	Rhi	Ce	Re	_Reticulamoeba	KC109672	100	0.82	SAR	Rhi	Ce	Im	Si	Allas-diplophysa	3	0.44992	2	6	0	0	0	5	0	0	0	0	0	0	0	0	0	0	0	0	0	0	0	0	0	0	0	0	0	0	0	0	0	0
OTU1148	Euk	SAR	Alv	Ci	In	Sp_Strombidinopsis	FJ790209	100	0.96	SAR	Alv	Ci	In	Sp	Strombidinopsis-acuminata	3	0.1045	2	6	0	0	0	0	0	0	0	0	0	0	0	0	0	0	0	0	0	0	0	0	0	0	0	0	0	0	0	0	0	0
OTU1297	Euk	SAR	Str	PX	Ph	Di_Lobospira	AF350235	100	0.91	SAR	Str	Ra	un	Ha	Haramonas-viridis	2	0.10588	2	6	0	0	0	0	0	2	0	0	0	0	0	0	0	0	0	0	0	0	0	0	0	0	0	0	0	0	0	0	0	0
OTU1265	Euk	SAR	Str	Ba	Ba	Ba_Entomoneis	AJ535160	100	0.92	SAR	Str	Ba	Ba	Ba	Bacillariophycidae-sp	3	0.25602	2	6	0	0	0	0	0	0	0	0	0	0	0	0	0	0	0	0	0	0	0	2	0	0	0	0	0	0	0	0	0	0
OTU1596	Euk	SAR	Str	Ba	Co	Th_Shionodiscus	JF794041	100	0.97	SAR	Str	Ba	Co	Th	Thalassiosira-anguste-lineata	5	0.20602	2	6	0	0	0	0	0	0	0	0	0	0	0	0	0	0	0	0	0	0	0	1	0	0	0	0	0	0	0	0	0	0
OTU1350	Euk	SAR	Rhi	Ce		_Auranticordis	EU484394	100	0.9	SAR	Rhi	Ce			Auranticordis-quadriverberis	3	0.13554	2	6	0	0	0	0	0	0	0	0	0	0	0	0	0	0	0	0	0	0	0	0	0	0	0	0	0	0	2	0	0	0
OTU1277	Euk	SAR	Alv	Di	Di	Di_Dinophysis	HM853815	100	0.95	SAR	Alv	Di	un	Ba	Balechina-pachydermata	2	0.08774	2	6	0	0	0	0	0	0	0	0	0	0	0	0	0	0	0	0	0	0	0	0	0	0	0	0	0	0	0	0	0	0
OTU1434	Euk	SAR	Str	PX	Xa	Mi_Botryidiopsidaceae	AM695636	100	0.98	SAR	Str				Leukarachnion-sp	4	0.03773	2	6	0	0	0	0	0	0	0	0	0	0	0	0	0	0	0	0	0	0	0	0	0	0	0	0	0	0	0	0	0	0
OTU1706	Euk	SAR	Str	Ba	Ba	Ba_Hantzschia	KM116100	100	0.98	SAR	Str	Ba	Co	Th	Thalassiosira-mala	8	0.05291	2	6	0	0	0	0	0	0	0	0	0	0	0	0	0	0	0	0	0	0	0	0	0	0	0	0	0	0	0	0	0	0
OTU1255	Euk	SAR	Rhi	Ce	Im	Si_Corythion	EF456751	100	0.94	SAR	Rhi	Ce	Ce	Ce	Massisteria-marina	4	0.13108	2	6	0	0	0	0	0	0	0	0	0	0	0	0	0	0	0	0	0	0	0	0	0	0	0	0	0	0	0	0	0	0
OTU816	Euk	SAR	Str	La	Th	Ob_Oblongichytrium	AB973534	100	0.89	SAR	Str	Di	Pe	Ci	Ciliophrys-infusionum	3	0.4305	1	6	0	0	0	6	0	0	0	0	0	0	0	0	0	0	0	0	0	0	0	0	0	0	0	0	0	0	0	0	0	0
OTU1215	Euk	SAR	Str	Ba	Ba	Ba_Pinnularia	JN418579	100	0.91	SAR	Rhi	Ce	Im	Si	Thaumatomonas-sp	2	0.09667	1	6	0	0	0	0	0	0	0	0	0	0	0	0	0	6	0	0	0	0	0	0	0	0	0	0	0	0	0	0	0	0
OTU1429	Euk	SAR	Str	Ba	Co	Co_Paralia	HQ912573	100	0.95	SAR	Str	Ba	Co	Co	Stephanopyxis-nipponica	4	0.14451	1	6	0	0	0	0	0	0	0	0	0	0	0	0	0	0	0	0	0	0	0	0	0	0	0	0	0	0	0	0	0	6
OTU1376	Euk	SAR	Str	Ba	Ba	Ba_Pinnularia	AM743094	100	0.93	SAR	Rhi	Ce	Re	un	Reticulamoeba-sp	4	0.23007	1	6	0	0	0	0	0	0	0	0	0	0	0	0	0	0	0	0	0	0	0	0	0	0	0	0	0	0	0	0	0	0
OTU1193	Euk	SAR	Rhi	Ce	Im	Si_Sphenoderia	KF539409	100	0.94	SAR	Rhi	Ce	Ce	Ce	Massisteria-sp	6	0.15255	1	6	0	0	0	0	0	0	0	0	0	0	0	0	0	0	0	0	0	0	0	0	0	0	0	0	0	0	0	0	0	0
OTU1279	Euk	SAR	Str	Ch	Ch	Ch_Chrysowaernella	HQ710556	100	0.91	SAR	Str	Bi	Ca		Caecitellus-paraparvulus	3	0.27522	1	6	0	0	0	0	0	0	0	0	0	0	0	0	0	0	0	0	0	0	0	0	0	0	0	0	0	0	0	0	0	0
OTU1438	Euk	SAR	Str	Ba	Ba	Ba_Navicula	KT072983	100	0.98	SAR	Str	Ba	un		Bacillariophyta-sp	8	0.05916	1	6	0	0	0	0	0	0	0	0	0	0	0	0	0	0	0	0	0	0	0	0	0	0	0	0	0	0	0	0	0	0
OTU1441	Euk	SAR	Alv	Di	Gy	Ka_Takayama	HM067010	100	0.99	SAR	Alv	Di	Gy	Ka	Karenia-bidigitata	3	0.0068	1	6	0	0	0	0	0	0	0	0	0	0	0	0	0	0	0	0	0	0	0	0	0	0	0	0	0	0	0	0	0	0
OTU1230	Euk	SAR	Str	Ba	Ba	Ba_Gyrosigma	KM999005	100	0.99	SAR	Str	Ba	Ba	Ba	Pleurosigma-planktonicum	4	0.00104	1	6	0	0	0	0	0	0	0	0	0	0	0	0	0	0	0	0	0	0	0	0	0	0	0	0	0	0	0	0	0	0
OTU1518	Euk	SAR	Rhi	Ce	Im	Si_Sphenoderia	KF539406	100	0.94	SAR	Rhi	Ce	Ce	Ce	Massisteria-sp	6	0.10125	1	6	0	0	0	0	0	0	0	0	0	0	0	0	0	0	0	0	0	0	0	0	0	0	0	0	0	0	0	0	0	0
OTU1471	Euk	SAR	Alv	Ci	In	Sp_Eutintinnus	KU715759	100	0.96	SAR	Alv	Ci	In	Sp	Eutintinnus-cf	3	0.12497	1	6	0	0	0	0	0	0	0	0	0	0	0	0	0	0	0	0	0	0	0	0	0	0	0	0	0	0	0	0	0	0
OTU1178	Euk	SAR	Str	PX	Xa	Mi_Botryochloris	AJ579341	100	0.93	SAR	Str	Ba	Ba	Ba	Frustulia-aotearoa	5	0.12153	1	6	0	0	0	0	0	0	0	0	0	0	0	0	0	0	0	0	0	0	0	0	0	0	0	0	0	0	0	0	0	0
OTU981	Euk	SAR	Alv	Di	Pe	Di_Preperidinium	AB716910	100	0.96	SAR	Alv	Di	Gy	Gy	Gymnodinium-lira	2	0.0676	1	6	0	0	0	0	0	0	0	0	0	0	0	0	0	0	0	0	0	0	0	0	0	0	0	0	0	0	0	0	0	0
OTU1353	Euk	SAR	Rhi	Ce	Im	Si_Euglypha	EF456755	100	0.94	SAR	Rhi	Ce	Ce	Ce	Massisteria-sp	5	0.15341	1	6	0	0	0	0	0	0	0	0	0	0	0	0	0	0	0	0	0	0	0	0	0	0	0	0	0	0	0	0	0	0
OTU1405	Euk	SAR	Str	Ba	Ba	Ba_Bacillaria	KT861008	100	0.92	SAR	Str	Bl			Blastocystis-cycluri	8	0.34891	1	6	0	0	0	0	0	0	0	0	0	0	0	0	0	0	0	0	0	0	0	0	0	0	0	0	0	0	0	0	0	0
OTU1180	Euk	SAR	Str	La	La	La_Labyrinthula	GQ499189	100	0.91	SAR	Rhi	Ce	De	Cl	Clathrulina-elegans	3	0.20247	1	6	0	0	0	0	0	0	0	0	0	0	0	0	0	0	0	0	0	0	0	0	0	0	0	0	0	0	0	0	0	0
OTU1866	Euk	SAR	Alv	Co	Co	_Colponema	KJ598081	100	0.96	SAR	Alv	Ac			Acavomonas-peruviana	6	0.04662	5	5	0	0	0	0	0	0	1	0	0	0	0	0	0	0	0	0	0	0	0	0	0	0	0	0	1	1	0	0	0	0
OTU1345	Euk	SAR	Str	Pe	Sa	Sa_Ankylochrysis	HQ710571	100	0.93	SAR	Str	Ba	Fr	Fr	Hyalosira-interrupta	2	0.12878	5	5	0	0	0	0	0	0	0	0	1	0	0	0	0	0	0	0	1	0	1	0	0	0	1	0	0	0	0	0	0	0
OTU1307	Euk	SAR	Alv	Ci	In	Ol_Apofrontonia	AM072621	100	0.88	SAR	Alv	Ci	In	Pr	Prorodon-viridis	3	0.1313	5	5	0	0	0	0	0	0	0	0	0	0	0	0	0	0	0	1	0	0	0	0	0	0	0	0	0	0	1	0	0	0
OTU1133	Euk	SAR	Alv	Ci	In	Sp_Strombidium	KP260510	100	1	SAR	Alv	Ci	In	Sp	Strombidium-capitatum	5	0.05425	4	5	0	0	0	0	0	0	0	0	0	1	0	0	0	0	0	0	0	0	0	0	0	0	2	0	0	0	0	1	0	1
OTU1068	Euk	SAR	Rhi	Ce	Im	Si_Corythion	EF456751	100	0.99	SAR	Rhi	Ce	Im	Si	Sphenoderia-macrolepis	4	0.012	4	5	0	0	0	0	0	0	1	0	0	0	0	0	0	0	0	0	0	0	0	0	0	0	0	0	0	1	0	0	0	0
OTU1314	Euk	SAR	Rhi	Ce	Th	Eb_Ebria	DQ303923	100	0.96	SAR	Rhi	Ce	Im	Si	Cyphoderia-major	14	0.1753	4	5	0	0	0	0	0	0	0	0	0	0	0	0	0	1	0	0	0	0	0	0	0	1	0	0	0	0	0	0	0	0
OTU1095	Euk	SAR	Rhi	Ce	Im	Si_Assulina	EF456749	100	0.81	SAR	Rhi	Ce	Im	Si	Euglypha-tuberculata	6	0.62324	3	5	0	0	0	0	0	2	0	0	0	0	0	0	0	0	0	0	0	0	0	0	0	0	0	0	0	2	0	0	0	0
OTU1463	Euk	SAR	Str	Ch	Ch	Ch_Chrysowaernella	HQ710556	100	0.92	SAR	Str	Ba	Fr	Fr	Licmophora-grandis	15	0.2084	3	5	0	0	0	0	0	0	0	2	0	0	0	0	0	0	0	0	0	0	0	0	0	0	0	0	0	0	0	0	0	0
OTU1574	Euk	SAR	Alv	Ci	In	Sp_Strobilidium	AF399123	100	0.99	SAR	Alv	Ci	In	Sp	Strobilidium-sp	3	0.06617	3	5	0	0	0	0	0	0	0	0	0	0	0	0	0	0	0	0	0	0	0	0	2	0	0	0	1	0	0	0	0	0
OTU1160	Euk	SAR	Str	Bi	un	_Bicosoecida	EF432537	100	0.94	SAR	Str	Bi	un		Bicosoecida-sp	4	0.08496	3	5	0	0	0	0	0	0	0	0	0	0	0	0	0	0	0	0	0	0	0	0	0	0	0	0	0	0	0	0	0	0
OTU877	Euk	SAR	Rhi	Ce	Th	Le_Lecythium	KP728379	100	0.92	SAR	Rhi	Ce	Re	un	Reticulamoeba-sp	4	0.40686	2	5	0	0	0	0	0	0	0	0	0	0	0	4	0	0	0	0	0	0	0	0	0	0	0	0	0	0	0	0	0	0
OTU1304	Euk	SAR	Str	Ba	Me	Bi_Orizaformis	KR048192	100	0.98	SAR	Str	Ba	Me	Bi	Psammoneis-obaidii	4	0.0655	2	5	0	0	0	0	0	0	0	0	0	0	0	0	0	4	0	0	0	0	0	1	0	0	0	0	0	0	0	0	0	0
OTU1101	Euk	SAR	Rhi	Ce	Th	Tr_Trachyrhizium	LC125926	100	0.99	SAR	Rhi	Ce	Th	Tr	Trachyrhizium-urniformis	7	0.05924	2	5	0	0	0	0	0	0	0	0	0	0	0	0	0	0	0	0	0	0	0	0	0	0	0	1	0	0	0	0	0	0
OTU1273	Euk	SAR	Alv	Ci	In	Sp_Parastrombidinopsis	AJ786648	100	0.93	SAR	Alv	Ci	In	Sp	Parastrombidinopsis-shimi	6	0.1125	2	5	0	0	0	0	0	0	0	0	0	0	0	0	0	0	0	0	0	0	0	0	0	0	0	0	0	0	0	0	0	2
OTU1375	Euk	SAR	Str	Ba	Co	Th_Roundia	KC284712	100	0.96	SAR	Str	Ba	Co	Th	Thalassiosira-mala	24	0.09369	2	5	0	0	0	0	0	0	0	0	0	0	0	0	0	0	0	0	0	0	0	0	0	0	0	0	0	0	0	0	0	0
OTU1291	Euk	SAR	Rhi	Ce		_Mataza	KM516201	100	1	SAR	Rhi	Ce	Th		Mataza-hastifera	2	0.00169	1	5	0	0	0	0	5	0	0	0	0	0	0	0	0	0	0	0	0	0	0	0	0	0	0	0	0	0	0	0	0	0
OTU1422	Euk	SAR	Rhi	Ce	Ce	Ce_Paracercomonas	FJ790727	100	0.91	SAR	Str	Ra	Ch	Ch	Heterosigma-akashiwo	3	0.15193	1	5	0	0	0	0	0	0	0	0	0	0	0	0	0	0	0	0	0	0	0	0	0	0	5	0	0	0	0	0	0	0
OTU797	Euk	SAR	Alv	Ci	In	Li_Askenasia	EU024989	100	0.96	SAR	Alv	Ci	In	Li	Askenasia-sp	3	0.02654	1	5	0	0	0	0	0	0	0	0	0	0	0	0	0	0	0	0	0	0	0	0	0	0	0	0	0	0	5	0	0	0
OTU1427	Euk	SAR	Str	Ba	Ba	Ba_Navicula	KT072983	100	0.97	SAR	Str	Ba	Co	Co	Ellerbeckia-sp	4	0.15311	1	5	0	0	0	0	0	0	0	0	0	0	0	0	0	0	0	0	0	0	0	0	0	0	0	0	0	0	0	5	0	0
OTU1505	Euk	SAR	Str	Ba	Ba	Ba_Navicula	KT072983	100	0.98	SAR	Str	Ba	un		Bacillariophyta-sp	7	0.03918	1	5	0	0	0	0	0	0	0	0	0	0	0	0	0	0	0	0	0	0	0	0	0	0	0	0	0	0	0	0	0	5
OTU1440	Euk	SAR	Str	La	Th	Ap_Aplanochytrium	AJ519935	100	0.95	SAR	Str	Ca			Cantina-marsupialis	11	0.11189	1	5	0	0	0	0	0	0	0	0	0	0	0	0	0	0	0	0	0	0	0	0	0	0	0	0	0	0	0	0	0	0
OTU1327	Euk	SAR	Str	Ph	Pl	Pl_Pleurochloridella	AM490831	100	0.98	SAR	Str	Ch	un	Ph	Phaeobotrys-solitaria	2	0.01601	1	5	0	0	0	0	0	0	0	0	0	0	0	0	0	0	0	0	0	0	0	0	0	0	0	0	0	0	0	0	0	0
OTU1281	Euk	SAR	Str	Ba	Ba	Ba_Pseudogomphonema	AF525663	100	0.93	SAR	Str				Leukarachnion-sp	3	0.0996	1	5	0	0	0	0	0	0	0	0	0	0	0	0	0	0	0	0	0	0	0	0	0	0	0	0	0	0	0	0	0	0
OTU1474	Euk	SAR	Rhi	Ce	Ce	un_Nucleocercomonas	HM536166	100	0.94	SAR	Rhi	Ce	Ce	Ce	Paracercomonas-elongata	3	0.04369	1	5	0	0	0	0	0	0	0	0	0	0	0	0	0	0	0	0	0	0	0	0	0	0	0	0	0	0	0	0	0	0
OTU1300	Euk	SAR	Str	Ch	Ch	Ph_Phaeoplaca	AF123296	100	0.94	SAR	Str	Ba	Ba	Ba	Nitzschia-frigida	5	0.10825	1	5	0	0	0	0	0	0	0	0	0	0	0	0	0	0	0	0	0	0	0	0	0	0	0	0	0	0	0	0	0	0
OTU1354	Euk	SAR	Rhi	Ce	Im	Si_Euglypha	AJ418782	100	0.85	SAR	Rhi	Ce	Im	Si	Euglypha-rotunda	2	0.32373	1	5	0	0	0	0	0	0	0	0	0	0	0	0	0	0	0	0	0	0	0	0	0	0	0	0	0	0	0	0	0	0
OTU1253	Euk	SAR	Rhi	Ce	Im	Si_Thaumatomastigidae	KC243117	100	0.97	SAR	Rhi	Ce	Im	Si	Thaumatomastigidae-sp	2	0.02166	1	5	0	0	0	0	0	0	0	0	0	0	0	0	0	0	0	0	0	0	0	0	0	0	0	0	0	0	0	0	0	0
OTU1360	Euk	SAR	Rhi	Ce	Th	Eb_Ebria	DQ303923	100	0.99	SAR	Rhi	Ce	Th		Mataza-hastifera	11	0.03573	1	5	0	0	0	0	0	0	0	0	0	0	0	0	0	0	0	0	0	0	0	0	0	0	0	0	0	0	0	0	0	0
OTU310	Euk	SAR	Rhi	Ce	Th	Tr_Trachyrhizium	LC125926	100	0.92	SAR	Rhi	Ce	Th	Tr	Trachyrhizium-urniformis	13	0.12361	4	4	0	0	1	0	0	0	0	0	0	0	0	0	0	0	0	0	0	0	0	0	0	0	0	0	0	1	0	1	0	0
OTU1250	Euk	SAR	Str	Oo	Ol	Ol_Olpidiopsis	KM210530	100	0.97	SAR	Str	Pe	Pe	Au	Aureococcus-anophagefferens	3	0.05237	4	4	0	0	0	0	0	0	0	0	0	0	0	0	0	0	0	0	0	0	0	0	1	0	0	0	0	0	0	0	0	0
OTU1346	Euk	SAR	Str	Ba	Co	Th_Thalassiosira	JF794045	100	0.98	SAR	Str	Ba	Ba	Ba	Nitzschia-stellata	3	0.02287	4	4	0	0	0	0	0	1	0	0	1	0	0	0	0	0	0	0	0	0	0	1	0	0	0	0	0	0	0	0	0	0
OTU1306	Euk	SAR	Rhi	Ce	Ce	Ce_Neocercomonas	AY496048	100	0.91	SAR	Rhi	Ce	Im	Si	Cyphoderia-major	3	0.25889	4	4	0	0	0	0	0	0	0	0	0	0	0	0	0	0	0	1	0	0	0	0	0	0	0	0	0	0	0	0	0	0
OTU1229	Euk	SAR	Str	Di	Pe	Ps_Pseudopedinella	HQ710560	100	0.96	SAR	Str	Di	Rh	Rh	Rhizochromulina-cf	8	0.10744	4	4	0	0	0	0	0	0	0	0	0	0	0	0	0	0	0	0	0	0	0	0	1	0	0	1	0	0	1	0	0	0
OTU1467	Euk	SAR	Str	Ba	Co	Rh_Guinardia	KJ577857	100	0.85	SAR	Rhi	Ce	Im	Si	Cyphoderia-major	15	0.26628	3	4	0	0	0	0	0	0	0	0	0	0	0	0	0	0	0	0	0	0	0	0	0	0	0	0	0	0	0	1	0	0
OTU1270	Euk	SAR	Alv	Ci	In	Sp_Tintinnopsis	AB640668	100	0.99	SAR	Alv	Ci	In	Sp	Codonellopsis-morchella	4	0.06188	3	4	0	0	0	0	0	0	0	0	0	0	0	0	0	2	0	0	0	0	0	1	0	0	0	1	0	0	0	0	0	0
OTU1216	Euk	SAR	Alv	Ci	In	Sp_Strombidium	JF791016	100	0.97	SAR	Alv	Ci	In	Sp	Pseudotontonia-simplicidens	2	0.08548	3	4	0	0	0	0	0	0	0	0	0	0	0	0	0	1	0	0	0	0	0	0	0	1	0	0	0	0	0	0	0	0
OTU1586	Euk	SAR	Str	Di	Di	Vi_Vicicitus	HQ646558	100	0.95	SAR	Str	Ba	Me	Bi	Psammoneis-obaidii	3	0.04193	3	4	0	0	0	0	0	0	0	0	0	0	0	0	0	0	0	0	0	0	0	0	0	0	0	0	0	0	1	0	0	0
OTU1323	Euk	SAR	Rhi	Ce	Pl	Pl_Spongospora	AF245217	100	0.93	SAR	Str	Ba	Fr	Fr	Licmophora-grandis	4	0.21523	3	4	0	0	0	0	0	0	0	0	0	0	0	0	0	0	0	0	0	0	0	0	0	0	0	0	0	0	0	0	0	0
OTU480	Euk	SAR	Str	Eu	Eu	Mo_Nannochloropsis	KU352758	100	1	SAR	Str	Eu	Eu	Mo	Nannochloropsis-oculata	2	0.00077	2	4	0	0	0	0	0	0	0	0	0	0	0	0	0	0	0	0	0	0	0	0	0	0	0	0	0	3	0	0	0	0
OTU1150	Euk	SAR	Alv	Di	Pr	Pr_Prorocentrum	DQ174089	100	1	SAR	Alv	Di	Pr	Pr	Prorocentrum-mexicanum	3	0.00547	2	4	0	0	3	0	0	0	0	0	0	0	0	0	0	0	0	0	0	0	0	1	0	0	0	0	0	0	0	0	0	0
OTU526	Euk	SAR	Rhi	Ce	Gl	Pr_Proleptomonas	GQ377682	100	0.91	SAR	Rhi	Ce	Th	Ps	Pseudodifflugia-cf	4	0.10336	2	4	0	0	0	3	0	0	0	0	0	0	0	0	0	0	0	0	0	0	0	0	0	0	0	0	0	0	0	0	0	0
OTU1364	Euk	SAR	Rhi	Ce	Im	Si_Euglypha	EF456755	100	0.93	SAR	Rhi	Ce	Im	Ma	Pseudopirsonia-mucosa	3	0.08349	2	4	0	0	0	0	0	0	0	0	0	0	0	0	0	0	0	0	3	0	0	0	0	0	0	0	0	0	0	0	0	0
OTU1356	Euk	SAR	Str	Ba	Co	Co_Planktoniella	HQ912562	100	0.91	SAR	Str	Ba	Ba	Ba	Pinnularia-acrosphaeria	6	0.10772	2	4	0	0	0	0	0	0	0	0	0	0	0	0	0	0	0	0	0	0	0	0	0	0	0	0	0	0	0	0	0	0
OTU1358	Euk	SAR	Rhi	Ce	Th	Eb_Ebria	DQ303923	100	0.9	SAR	Rhi	Ce			Nuclearia-like-filose	3	0.10703	2	4	0	0	0	0	0	0	0	0	0	0	0	0	0	0	0	0	0	0	0	0	0	0	0	0	0	0	0	0	0	0
OTU1377	Euk	SAR	Str	Ba	Co	Co_Corethron	KC309526	100	0.88	SAR	Str	Ba	Co	Co	Corethron-inerme	2	0.28446	2	4	0	0	0	0	0	0	0	0	0	0	0	0	0	0	0	0	0	0	0	0	0	0	0	0	0	0	0	0	0	0
OTU947	Euk	SAR	Rhi	Ce	Im	Si_Corythion	EF456751	100	0.94	SAR	Rhi	Ce	Ce	Ce	Massisteria-sp	7	0.08537	2	4	0	0	0	0	0	0	0	0	0	0	0	0	0	0	0	0	0	0	0	0	0	0	0	0	0	0	0	0	0	0
OTU1105	Euk	SAR	Rhi	Ce	Gy	_Gymnophrys	GU320582	100	1	SAR	Rhi	Ce	Gy		Gymnophrys-sp	3	0.04045	1	4	0	0	0	0	0	0	0	0	0	0	0	0	0	0	4	0	0	0	0	0	0	0	0	0	0	0	0	0	0	0
OTU1431	Euk	SAR	Alv	Ap	Co	Co_Sarcocystis	GQ251019	100	0.88	SAR	Alv	Ap	Co	Co	Eimeria-cf	2	0.41885	1	4	0	0	0	0	0	0	0	0	0	0	0	0	0	0	0	0	0	0	0	0	0	0	0	0	0	0	0	0	0	0
OTU1378	Euk	SAR	Rhi	Ce		_Auranticordis	EU484394	100	0.9	SAR	Rhi	Ce	Im	Si	Cyphoderia-major	6	0.19842	1	4	0	0	0	0	0	0	0	0	0	0	0	0	0	0	0	0	0	0	0	0	0	0	0	0	0	0	0	0	0	0
OTU747	Euk	SAR	Rhi	Po	Na	Pl_Cladoscenium	HQ651793	100	0.98	SAR	Rhi	Po	Na	Pl	Cladoscenium-tricolpium	2	0.01848	1	4	0	0	0	0	0	0	0	0	0	0	0	0	0	0	0	0	0	0	0	0	0	0	0	0	0	0	0	0	0	0
OTU1298	Euk	SAR	Rhi	Ce	Va	Le_Leptophrys	KC174719	100	0.86	SAR	Rhi	un	Co		Corallomyxa-tenera	6	0.43775	1	4	0	0	0	0	0	0	0	0	0	0	0	0	0	0	0	0	0	0	0	0	0	0	0	0	0	0	0	0	0	0
OTU1407	Euk	SAR	Rhi	Ce	Im	Si_Trachelocorythion	AJ418789	100	0.96	SAR	Rhi	Ce	Im	Si	Euglypha-filifera	3	0.08138	1	4	0	0	0	0	0	0	0	0	0	0	0	0	0	0	0	0	0	0	0	0	0	0	0	0	0	0	0	0	0	0
OTU1355	Euk	SAR	Str	Ba	Co	Th_Roundia	KC284712	100	0.96	SAR	Str	Ba	Co	Th	Thalassiosira-mala	21	0.11509	1	4	0	0	0	0	0	0	0	0	0	0	0	0	0	0	0	0	0	0	0	0	0	0	0	0	0	0	0	0	0	0
OTU460	Euk	SAR	Alv	Ci	In	Li_Trachelotractus	FJ876954	100	0.95	SAR	Alv	Ci	In	Li	Trachelotractus-entzi	2	0.22393	1	4	0	0	0	0	0	0	0	0	0	0	0	0	0	0	0	0	0	0	0	0	0	0	0	0	0	0	0	0	0	0
OTU1761	Euk	SAR	Rhi	Ce	Th	Le_Lecythium	KP728379	100	0.94	SAR	Rhi	Ce	Ce	Ce	Cercomonas-alexieffi	3	0.05964	1	4	0	0	0	0	0	0	0	0	0	0	0	0	0	0	0	0	0	0	0	0	0	0	0	0	0	0	0	0	0	0
OTU1553	Euk	SAR	Str	Ba	Co	Th_Skeletonema	DQ396517	100	0.96	SAR	Str	Pi			Pirsonia-punctigera	2	0.0658	3	3	0	0	0	0	0	0	0	0	0	0	0	0	0	0	0	1	0	0	0	0	0	0	0	0	0	0	0	0	0	0
OTU1803	Euk	SAR	Str	Oo	un	La_Lagenisma	KT273921	100	0.97	SAR	Rhi	Ce	Ce	Sa	Sainouron-acronematica	5	0.47827	3	3	0	0	0	0	0	0	0	0	0	0	1	0	0	0	0	1	0	0	0	0	0	0	0	0	0	0	1	0	0	0
OTU1635	Euk	SAR	Str	PX	Xa	Mi_Chlorellidium	FJ030892	100	0.94	SAR	Str	Ba	Fr	Fr	Licmophora-grandis	17	0.18727	3	3	0	0	0	0	0	0	0	0	0	0	0	1	0	1	0	0	0	0	1	0	0	0	0	0	0	0	0	0	0	0
OTU1420	Euk	SAR	Str	Ba	Co	Th_Discostella	DQ514903	100	0.97	SAR	Str	Ba	Ba	Ba	Nitzschia-frigida	5	0.0659	3	3	0	0	0	0	0	0	0	0	0	0	0	0	0	0	0	0	0	0	0	0	1	1	0	0	0	0	0	0	0	0
OTU1988	Euk	SAR	Str	Di	Pe	Ap_Apedinella	HQ710559	100	0.98	SAR	Str	Di	Rh	Rh	Rhizochromulina-cf	4	0.06389	3	3	0	0	0	0	0	0	0	0	0	0	0	0	0	0	0	0	0	0	0	0	0	0	0	0	0	0	0	1	0	0
OTU1452	Euk	SAR	Alv	Di	Pe	He_Heterocapsa	KF925338	100	0.98	SAR	Alv	Di	Pe	He	Heterocapsa-arctica	5	0.06319	2	3	0	0	0	0	0	0	2	0	0	0	0	0	0	0	0	0	0	0	0	0	0	0	0	0	0	0	0	0	0	0
OTU1722	Euk	SAR	Str	Ba	Me	Bi_Orizaformis	KR048192	100	0.98	SAR	Str	Ba	Co	Co	Stictocyclus-stictodiscus	3	0.08183	2	3	0	0	0	0	0	0	0	0	0	0	0	0	0	0	0	1	0	0	0	0	0	0	2	0	0	0	0	0	0	0
OTU1476	Euk	SAR	Str	Ba	Ba	Ba_Navicula	KT072983	100	0.98	SAR	Str	Ba	un		Bacillariophyta-sp	4	0.06009	2	3	0	0	0	0	0	0	0	0	0	0	0	0	0	0	0	0	0	0	0	1	0	0	0	0	0	0	0	0	0	0
OTU523	Euk	SAR	Str	Ba	Co	Ch_Attheya	EF106785	100	0.91	SAR	Rhi	Ce			Marine-flagellate	6	0.13365	2	3	0	0	0	0	0	0	0	0	0	0	0	0	0	0	0	0	0	0	0	0	0	0	0	0	0	0	0	0	0	0
OTU1141	Euk	SAR	Str	Ba	Ba	Ba_Navicula	KT072983	100	0.99	SAR	Str	Ba	un		Bacillariophyta-sp	11	0.00075	2	3	0	0	0	0	0	0	0	0	0	0	0	0	0	0	0	0	0	0	0	0	0	0	0	0	0	0	1	0	0	0
OTU1374	Euk	SAR	Str	Ba	Me	To_Toxarium	HQ912662	100	0.82	SAR	Rhi	Ce	Va	Va	Penardia-sp	7	0.39739	2	3	0	0	0	0	0	0	0	0	0	0	0	0	0	0	0	0	0	0	0	0	0	0	0	0	0	0	0	0	0	0
OTU975	Euk	SAR	Rhi	Ce	Im	Si_Sphenoderia	KF539409	100	0.92	SAR	Rhi	Ce	Im	Si	Trachelocorythion-pulchellum	9	0.11728	2	3	0	0	0	0	0	0	0	0	0	0	0	0	0	0	0	0	0	0	0	0	0	0	0	0	0	0	0	0	0	0
OTU1598	Euk	SAR	Str	PX	Ph	Fu_Fucus	HQ710578	100	0.97	SAR	Str	PX	Ph	Di	Exallosorus-olsenii	3	0.08176	2	3	0	0	0	0	0	0	0	0	0	0	0	0	0	0	0	0	0	0	0	0	0	0	0	0	0	0	0	0	0	0
OTU849	Euk	SAR	Rhi	Ce	Im	Si_Sphenoderia	KF539410	100	0.96	SAR	Rhi	Ce	Ce	Ce	Massisteria-sp	4	0.17141	2	3	0	0	0	0	0	0	0	0	0	0	0	0	0	0	0	0	0	0	0	0	0	0	0	0	0	0	0	0	0	0
OTU672	Euk	SAR	Str	Oo	Sa	Sa_Aquastella	KF294791	100	0.9	SAR	Str	Ba	Co	Ch	Leptocylindrus-minimus	2	0.23296	1	3	0	0	0	0	0	0	0	0	0	0	0	0	0	3	0	0	0	0	0	0	0	0	0	0	0	0	0	0	0	0
OTU1493	Euk	SAR	Str	Ba	Co	Th_Thalassiosira	JF794045	100	0.97	SAR	Str	Ba	Co	Rh	Urosolenia-eriensis	3	0.08245	1	3	0	0	0	0	0	0	0	0	0	0	0	0	0	0	0	0	0	0	0	3	0	0	0	0	0	0	0	0	0	0
OTU1367	Euk	SAR	Str	Ba	Ba	Ba_Pauliella	KJ658408	100	0.95	SAR	Str	Ba	Co	Th	Thalassiosira-mala	12	0.13705	1	3	0	0	0	0	0	0	0	0	0	0	0	0	0	0	0	0	0	0	0	0	0	3	0	0	0	0	0	0	0	0
OTU1439	Euk	SAR	Str	Ba	Co	Ch_Chaetoceros	KF899834	100	1	SAR	Str	Ba	Co	Ch	Chaetoceros-debilis	2	0.00803	1	3	0	0	0	0	0	0	0	0	0	0	0	0	0	0	0	0	0	0	0	0	0	0	0	0	0	0	0	0	0	0
OTU1444	Euk	SAR	Str	Ba	Co	Th_Thalassiosira	KU352756	100	0.99	SAR	Str	Ba	Co	Th	Thalassiosira-mala	18	0.01418	1	3	0	0	0	0	0	0	0	0	0	0	0	0	0	0	0	0	0	0	0	0	0	0	0	0	0	0	0	0	0	0
OTU1347	Euk	SAR	Rhi	Ce	Va	Va_Vampyrella	HE609041	100	0.86	SAR	Rhi	Ce	Pl	Pl	Ligniera-junci	2	0.3019	1	3	0	0	0	0	0	0	0	0	0	0	0	0	0	0	0	0	0	0	0	0	0	0	0	0	0	0	0	0	0	0
OTU1477	Euk	SAR	Rhi	Ce	Ce	Ce_Cercomonas	DQ211597	100	0.88	SAR	Rhi	Ce			Marine-flagellate	4	0.17749	1	3	0	0	0	0	0	0	0	0	0	0	0	0	0	0	0	0	0	0	0	0	0	0	0	0	0	0	0	0	0	0
OTU1363	Euk	SAR	Str	Pe	Pe	Au_Aureococcus	JQ420077	100	0.94	SAR	Str	Pe	un		Pelagophyceae-sp	2	0.04326	2	2	0	0	0	0	0	0	0	0	0	0	0	0	0	0	0	0	1	0	0	0	0	0	0	0	0	0	0	0	0	0
OTU1267	Euk	SAR	Str	Ba	Ba	Ba_Cymbella	JN033248	100	0.98	SAR	Str	Ba	Ba	Ba	Hantzschia-sp	3	0.02458	2	2	0	0	0	0	0	0	0	0	0	0	0	0	0	0	0	0	0	0	0	0	0	0	0	0	0	0	0	1	0	0
OTU1401	Euk	SAR	Str	La	La	La_Labyrinthula	KU559376	100	0.83	SAR	Alv	El	Th		Thalassomyces-sp	2	0.32816	2	2	0	0	0	0	0	1	0	0	0	0	0	0	0	0	0	0	0	0	0	0	0	0	0	0	0	0	0	0	0	0
OTU1332	Euk	SAR	Rhi	Ce	Ce	Ce_Cercomonas	AY748806	100	0.99	SAR	Rhi	Ce	Gl	Vi	Viridiraptor-sp	2	0.08885	2	2	0	0	0	0	0	0	0	0	0	1	0	0	0	0	0	0	0	0	0	0	0	0	0	0	0	0	0	0	0	0
OTU1182	Euk	SAR	Str	Ba	Co	Th_Thalassiosira	JF794045	100	0.97	SAR	Str	Ba	Ba	Ba	Amphora-commutata	4	0.06497	2	2	0	0	0	0	0	0	0	0	0	0	0	0	0	1	0	0	0	0	0	0	0	0	0	0	0	0	0	0	0	0
OTU995	Euk	SAR	Str	Hy	Hy	Hy_Hyphochytrium	AF163294	100	0.96	SAR	Str	Ba	Fr	Fr	Licmophora-gracilis	2	0.02251	2	2	0	0	0	0	0	0	0	0	0	0	0	0	0	0	0	0	0	1	0	0	0	0	0	0	0	0	0	0	0	0
OTU1578	Euk	SAR	Alv	Ci	In	Sp_Helicostomella	AB640639	100	0.94	SAR	Alv	Ci	In	Sp	Tintinnopsis-major	2	0.22231	2	2	0	0	0	0	0	0	0	0	0	0	0	0	0	0	0	0	0	0	0	0	0	0	0	1	0	0	0	0	0	0
OTU1316	Euk	SAR	Str	De		_cf	JX272636	100	0.89	SAR	Rhi	Ce	Im	Si	Esquamula-lacrimiformis	3	0.16455	2	2	0	0	0	0	0	0	0	0	0	0	0	0	0	0	0	0	0	0	0	0	0	0	0	0	0	1	0	0	0	0
OTU1359	Euk	SAR	Str	Oo	Sa	Sa_Protoachlya	KP098375	100	0.88	SAR	Str	Ba	Co	Co	Coscinodiscus-radiatus	2	0.41221	2	2	0	0	0	0	0	0	0	0	0	0	0	0	0	0	0	0	0	0	0	0	0	0	0	0	0	0	1	0	0	0
OTU1318	Euk	SAR	Str	Bi	un	Ha_Halocafeteria	KT210055	100	0.9	SAR	Str	Ba	Ba	Ba	Amphora-ovalis	2	0.34501	1	2	0	0	0	0	0	0	0	0	0	0	0	0	0	0	0	0	0	0	0	0	0	0	0	0	0	0	0	0	0	0
OTU1455	Euk	SAR	Str	Ba	Co	Ch_Chaetoceros	AB847418	100	0.99	SAR	Str	Ba	Co	Ch	Chaetoceros-setoense	3	0.05204	1	2	0	0	0	0	0	0	0	0	0	0	0	0	2	0	0	0	0	0	0	0	0	0	0	0	0	0	0	0	0	0
OTU500	Euk	SAR	Rhi	Ce	Ce	Ce_Massisteria	AF174370	100	0.96	SAR	Rhi	Ce	Ce	Ce	Massisteria-marina	7	0.1083	1	2	0	0	0	0	0	0	0	0	0	0	0	0	0	0	0	0	0	0	0	2	0	0	0	0	0	0	0	0	0	0
OTU1065	Euk	SAR	Rhi	Ce	Ce	Ce_Massisteria	AF174370	100	0.97	SAR	Rhi	Ce	Ce	Ce	Massisteria-marina	8	0.02947	1	2	0	0	0	0	0	0	0	0	0	0	0	0	0	0	0	0	0	0	0	0	0	0	0	0	0	2	0	0	0	0
OTU630	Euk	SAR	Alv	Ci	In	Sp_Strombidium	KJ737432	100	0.98	SAR	Alv	Ci	In	Sp	Strombidium-capitatum	19	0.07722	1	2	0	0	0	0	0	0	0	0	0	0	0	0	0	0	0	0	0	0	0	0	0	0	0	0	0	0	0	0	0	0
OTU1719	Euk	SAR	Rhi	Ce	Im	Ma_Pseudopirsonia	AJ561116	100	0.93	SAR	Rhi	Ce	Im	Ma	Pseudopirsonia-mucosa	10	0.06089	1	2	0	0	0	0	0	0	0	0	0	0	0	0	0	0	0	0	0	0	0	0	0	0	0	0	0	0	0	0	0	0
OTU994	Euk	SAR	Str	Ch	Ch	Ch_Chrysosaccus	EF165120	100	0.99	SAR	Str	Ch	Ch	Ch	Chrysosaccus-sp	2	0.00415	1	2	0	0	0	0	0	0	0	0	0	0	0	0	0	0	0	0	0	0	0	0	0	0	0	0	0	0	0	0	0	0
OTU1179	Euk	SAR	Alv	Ap	Co	Co_Coccidia	HM117908	100	0.95	SAR	Alv	Ap			Apicomplexa-sp	5	0.08485	1	2	0	0	0	0	0	0	0	0	0	0	0	0	0	0	0	0	0	0	0	0	0	0	0	0	0	0	0	0	0	0
OTU1100	Euk	SAR	Alv	Ap	Co	Co_Cryptosporidium	AY954882	100	0.88	SAR	Rhi	Ce	Ce	He	Allantion-sp	3	0.13018	1	2	0	0	0	0	0	0	0	0	0	0	0	0	0	0	0	0	0	0	0	0	0	0	0	0	0	0	0	0	0	0
OTU547	Euk	SAR	Str	Oo	Sa	Sa_Aquastella	KF294791	100	0.84	SAR	Rhi	Ce	As	Ha	Haplosporidium-tuxtlensis	3	0.89387	1	2	0	0	0	0	0	0	0	0	0	0	0	0	0	0	0	0	0	0	0	0	0	0	0	0	0	0	0	0	0	0
OTU661	Euk	SAR	Rhi	Ce	Im	Si_Corythionella	GU228850	100	0.9	SAR	Rhi	Ce	Im	Ma	Abollifer-globosa	7	0.21466	1	1	1	0	0	0	0	0	0	0	0	0	0	0	0	0	0	0	0	0	0	0	0	0	0	0	0	0	0	0	0	0
OTU1131	Euk	SAR	Str	Oo	Sa	Sa_Protoachlya	KP098375	100	0.97	SAR	Str	Ca			Cantina-marsupialis	11	0.11189	1	1	1	0	0	0	0	0	0	0	0	0	0	0	0	0	0	0	0	0	0	0	0	0	0	0	0	0	0	0	0	0
OTU773	Euk	SAR	Str	Ba	Ba	Ba_Biremis	KM078661	100	0.87	SAR	Str	La	Am	Am	Amphitrema-wrightianum	2	0.18912	1	1	0	0	0	0	0	0	0	0	0	0	0	0	0	0	0	0	0	0	0	0	0	0	0	0	0	0	0	0	0	0
OTU1203	Euk	SAR	Str	Bi	Ad	_Adriamonas	AF243501	100	0.98	SAR	Str	Bi	Ad		Adriamonas-peritocrescens	3	0.05081	1	1	0	0	0	1	0	0	0	0	0	0	0	0	0	0	0	0	0	0	0	0	0	0	0	0	0	0	0	0	0	0
OTU1292	Euk	SAR	Str	Ba	Ba	Ba_Rhoicosphenia	KJ011673	100	1	SAR	Str	Ba	Ba	Ba	Rhoicosphenia-cf	2	0.00125	1	1	0	0	0	0	0	0	0	1	0	0	0	0	0	0	0	0	0	0	0	0	0	0	0	0	0	0	0	0	0	0
OTU1287	Euk	SAR	Str	Hy	Hy	Hy_Hyphochytrium	AF163294	100	0.96	SAR	Str	Ra	Ch	Ch	Heterosigma-akashiwo	3	0.06843	1	1	0	0	0	0	0	0	0	0	0	0	0	0	0	0	0	0	0	0	0	0	0	0	0	0	0	0	0	0	0	0
OTU1239	Euk	SAR	Alv	Ci	In	Sp_Protocruzia	DQ190467	100	0.98	SAR	Alv	Ci	In	Sp	Protocruzia-contrax	3	0.09428	1	1	0	0	0	0	0	0	0	0	0	1	0	0	0	0	0	0	0	0	0	0	0	0	0	0	0	0	0	0	0	0
OTU1334	Euk	SAR	Alv	Ci	un	Cr_Cryptocaryon	AF351579	100	0.96	SAR	Alv	Ci	In	Ol	Parauronema-virginianum	2	0.29623	1	1	0	0	0	0	0	0	0	0	0	0	1	0	0	0	0	0	0	0	0	0	0	0	0	0	0	0	0	0	0	0
OTU771	Euk	SAR	Alv	Ci	In	Sp_Anteholosticha	FJ156105	100	1	SAR	Alv	Ci	In	Sp	Anteholosticha-scutellum	2	0.00391	1	1	0	0	0	0	0	0	0	0	0	0	0	0	0	0	0	0	0	0	0	1	0	0	0	0	0	0	0	0	0	0
OTU593	Euk	SAR	Alv	Ci	In	Ol_Ichthyophthirius	KJ690572	100	0.85	SAR	Rhi	Ce	Va	Le	Leptophryidae-sp	4	0.25573	1	1	0	0	0	0	0	0	0	0	0	0	0	0	0	0	0	0	0	0	0	0	1	0	0	0	0	0	0	0	0	0
OTU1064	Euk	SAR	Str	Ba	Ba	Ba_Biremis	KM078661	100	0.97	SAR	Str	Ba	Co	Ch	Tenuicylindrus-belgicus	5	0.07295	1	1	0	0	0	0	0	0	0	0	0	0	0	0	0	0	0	0	0	0	0	0	0	0	0	0	0	0	0	0	0	0
OTU533	Euk	SAR	Str	La	Th	Ap_Aplanochytrium	KT901795	100	0.94	SAR	Rhi	Ce	Ce	Ce	Paracercomonas-astra	5	0.06652	1	1	0	0	0	0	0	0	0	0	0	0	0	0	0	0	0	0	0	0	0	0	0	0	0	0	0	0	1	0	0	0
OTU1428	Euk	SAR	Str	Ba	Co	Rh_Guinardia	KC309536	100	0.97	SAR	Str	Ba	Co	Rh	Guinardia-striata	3	0.08471	1	1	0	0	0	0	0	0	0	0	0	0	0	0	0	0	0	0	0	0	0	0	0	0	0	0	0	0	0	1	0	0
OTU383	Euk	SAR	Alv	Pe	Pe	Pe_Perkinsus	AY487833	100	0.93	SAR	Alv	Pe	Pe	Pe	Parvilucifera-sinerae	2	0.21706	1	1	0	0	0	0	0	0	0	0	0	0	0	0	0	0	0	0	0	0	0	0	0	0	0	0	0	0	0	0	0	0
OTU1197	Euk	SAR	Rhi	Ce	Im	Si_Trinema	AJ418792	100	0.97	SAR	Rhi	Ce	Re	un	Reticulamoeba-sp	4	0.34324	1	1	0	0	0	0	0	0	0	0	0	0	0	0	0	0	0	0	0	0	0	0	0	0	0	0	0	0	0	0	0	0
OTU748	Euk	SAR	Str	Ba	Ba	Ba_Navicula	EF106789	100	0.96	SAR	Str	Ba	Fr	Fr	Podocystis-spathulata	2	0.03245	1	1	0	0	0	0	0	0	0	0	0	0	0	0	0	0	0	0	0	0	0	0	0	0	0	0	0	0	0	0	0	0
OTU595	Euk	SAR	Alv	Ci	In	Sp_Psammomitra	EF486865	100	0.98	SAR	Alv	Ci	In	Sp	Psammomitra-retractilis	2	0.04399	1	1	0	0	0	0	0	0	0	0	0	0	0	0	0	0	0	0	0	0	0	0	0	0	0	0	0	0	0	0	0	0
OTU1352	Euk	SAR	Str	Ba	Co	Th_Thalassiosira	DQ514866	100	0.94	SAR	Str	Ba	Co	Th	Thalassiosira-anguste-lineata	3	0.32386	1	1	0	0	0	0	0	0	0	0	0	0	0	0	0	0	0	0	0	0	0	0	0	0	0	0	0	0	0	0	0	0
OTU1214	Euk	SAR	Rhi	Ce	Ph	Ph_Medusetta	AB998920	100	0.9	SAR	Rhi	Ce	Im	Si	Thaumatomonas-sp	6	0.20665	1	1	0	0	0	0	0	0	0	0	0	0	0	0	0	0	0	0	0	0	0	0	0	0	0	0	0	0	0	0	0	0
OTU631	Euk	SAR	Rhi	Ce	Th	Eb_Ebria	DQ303923	100	0.91	SAR	Rhi	un			Dimorpha-like-sp	6	0.06131	1	1	0	0	0	0	0	0	0	0	0	0	0	0	0	0	0	0	0	0	0	0	0	0	0	0	0	0	0	0	0	0
											TROPHIC	Ttaxo_rank2	Ttaxo_rank3							To.1.2	To.1.10	To.3.2	To.3.10	p0z0.1.2	p0z0.1.10	p0z0.2.2	p0z0.2.10	p0z0.3.2	p0z0.3.10	p1z0.1.2	p1z0.1.10	p1z0.2.2	p1z0.2.10	p1z0.3.2	p1z0.3.10	p2z0.1.2	p2z0.1.10	p2z0.2.2	p2z0.2.10	p2z0.3.2	p2z0.3.10	p3z0.1.2	p3z0.1.10	p3z0.2.10	p3z0.3.2	p0z1.1.2	p0z1.1.10	p0z1.2.2	p0z1.2.10
											heterotrophs	Alv	Ac							0	0	8	0	0	0	1	0	0	0	0	0	0	0	0	0	0	0	0	0	0	0	0	0	1	1	0	0	0	0
											parasites	Alv	Ap							71	0	19	0	0	0	0	34	0	15	0	0	0	0	0	0	0	0	123	0	0	0	0	0	0	6	0	11	8	0
											mixotrophs	Alv	Ch							0	10	0	0	0	0	0	0	0	0	0	0	0	0	0	0	0	0	0	0	0	0	0	33	0	0	0	6	0	99
											heterotrophs	Alv	Ci							30661	19917	17988	28227	11938	7393	10010	10063	5519	3536	16761	10092	8403	4123	6448	7901	14556	11422	9986	11512	6942	9007	20082	13645	10811	12835	10390	6678	6007	10111
											heterotrophs	Alv	Co							2	116	26	38	7	8	3	0	31	0	7	0	10	4	68	0	14	26	2	0	128	0	11	7	0	8	26	36	103	20
											autotrophs	Alv	Di							2430	1842	1772	2530	1378	689	1079	983	1797	636	1077	869	1177	713	1426	1246	1667	1406	1013	873	2009	614	1322	967	711	2621	1294	604	1456	1633
											parasites	Alv	El							0	0	0	0	0	1	0	0	0	0	0	0	0	0	0	0	0	0	0	0	0	0	0	0	0	0	0	0	0	0
											parasites	Alv	Pe							0	0	0	0	0	0	11	0	0	0	0	0	0	0	0	0	0	0	0	0	0	0	0	0	0	0	0	0	0	0
											heterotrophs	Rhi	Ac							37	11	26	63	29	56	30	8	11	10	19	16	119	11	71	13	63	85	0	19	19	2	34	20	16	71	35	4	48	3
											heterotrophs	Rhi	Ce							4120	1717	2153	2757	2194	715	1806	916	1902	1121	1435	604	2279	521	2380	647	1833	2353	968	694	2294	960	1749	497	721	2417	2373	606	2421	1335
											heterotrophs	Rhi	Fo							0	0	0	15	9	10	27	1	9	3	21	1	12	3	7	0	11	6	3	1	13	0	5	1	2	5	31	1	29	46
											heterotrophs	Rhi	Gr							0	0	0	0	0	7	0	0	0	0	0	0	0	0	0	0	0	0	0	0	0	16	0	0	0	0	0	0	0	0
											heterotrophs	Rhi	Po							177	115	93	2	82	76	100	28	93	27	56	17	135	23	45	145	115	8	103	53	102	29	84	84	22	88	109	9	107	5
											heterotrophs	Rhi	un							3	50	180	66	6	41	3	261	8	61	19	78	16	91	21	165	22	23	11	98	30	112	5	79	84	69	12	96	28	64
											autotrophs	Str	Ba							3472	19017	18926	2872	7951	30183	11271	28229	11796	36307	6835	28693	6319	36520	9182	31296	8563	9824	26381	27682	13763	31920	9221	26625	31766	12151	9402	36528	9566	27676
											heterotrophs	Str	Bi							1566	1734	1407	3080	665	355	951	863	1088	379	894	517	1480	479	1492	958	2221	1516	398	1033	2088	495	1088	1315	1093	2333	982	485	921	1057
											parasites	Str	Bl							99	0	39	93	95	51	161	38	117	13	61	43	85	72	36	31	85	80	171	65	68	6	26	51	29	85	133	6	109	46
											heterotrophs	Str	Ca							14	5	2	34	7	0	14	0	6	0	4	0	0	0	4	0	8	17	2	2	31	0	3	1	1	12	6	0	10	0
											mixotrophs	Str	Ch							816	249	465	594	1946	994	2638	1189	2087	733	1850	587	2989	737	2264	616	2413	4706	1925	813	2674	850	2619	866	727	3578	1937	430	2690	805
											heterotrophs	Str	De							0	0	0	0	1	0	0	0	6	0	1	4	0	2	0	0	0	0	0	1	0	0	0	0	1	1	2	0	0	0
											autotrophs	Str	Di							3931	3574	5195	7228	19229	8196	17420	6544	18444	5806	16765	7231	22789	5554	20921	5466	14510	14715	7885	6023	14220	4923	10589	5036	3276	9821	18116	3725	21466	5797
											autotrophs	Str	Eu							0	0	0	0	0	0	0	0	0	0	0	0	2	0	0	0	0	0	0	0	1	0	3	0	0	3	0	0	0	0
											heterotrophs	Str	Hy							0	0	0	0	0	0	2	0	0	0	0	0	0	0	5	0	0	0	0	0	0	0	0	0	0	0	0	0	0	0
											heterotrophs	Str	In							75	60	32	55	51	34	64	14	89	2	45	21	43	13	92	88	42	199	27	28	15	5	13	7	13	39	77	33	49	53
											parasites	Str	La							0	2	16	22	1	0	0	2	17	4	2	11	7	16	6	1	10	0	0	4	5	0	0	1	1	8	2	0	1	0
											autotrophs	Str	Ol							0	1	0	0	0	0	0	0	0	0	0	0	0	0	0	0	0	0	0	0	0	0	0	1	0	0	0	0	0	0
											parasites	Str	Oo							3	14	73	24	4	2	1	1	1	39	0	0	0	0	7	12	0	45	0	7	0	1	0	0	0	2	3	1	2	0
											autotrophs	Str	Pe							400	146	224	679	689	106	728	33	1662	62	624	122	864	101	1812	88	520	1201	194	146	1605	113	591	20	66	856	730	57	847	51
											autotrophs	Str	Ph							4	7	0	0	21	0	0	1	3	4	0	0	0	3	3	2	0	0	1	14	0	0	0	0	3	0	0	4	0	0
											autotrophs	Str	Pi							0	0	0	0	0	0	0	0	0	0	0	0	0	0	0	1	0	0	0	0	0	0	0	0	0	0	0	0	0	0
											autotrophs	Str	PX							1261	840	1076	1081	1544	813	1639	494	2275	770	1393	678	1551	776	1739	880	1433	773	577	671	1895	817	1086	575	483	1159	1945	456	2001	858
											autotrophs	Str	Ra							0	1	33	0	0	15	0	2	2	91	0	1	0	1	1	0	0	0	0	8	0	0	5	0	0	8	11	0	4	2
											autotrophs	Str	Sc							0	0	0	0	0	1	1	1	0	0	2	0	4	0	0	2	0	18	2	1	8	0	14	2	0	23	0	0	0	0
											autotrophs	Str	So							3	0	25	76	15	14	31	1	2	5	56	0	2	10	51	1	59	134	0	11	35	0	21	2	1	24	15	3	38	0
											autotrophs	Str	Sy							826	572	219	443	2042	226	1922	294	2940	337	2000	407	1649	222	1850	441	1788	1423	228	227	1979	130	1422	165	169	1679	2278	212	2016	336
											heterotrophs	Str								29	0	3	21	96	14	87	0	95	39	73	8	65	5	69	0	67	20	0	14	76	0	7	0	3	97	91	9	73	3
																			sample	To.1.2	To.1.10	To.3.2	To.3.10	p0z0.1.2	p0z0.1.10	p0z0.2.2	p0z0.2.10	p0z0.3.2	p0z0.3.10	p1z0.1.2	p1z0.1.10	p1z0.2.2	p1z0.2.10	p1z0.3.2	p1z0.3.10	p2z0.1.2	p2z0.1.10	p2z0.2.2	p2z0.2.10	p2z0.3.2	p2z0.3.10	p3z0.1.2	p3z0.1.10	p3z0.2.10	p3z0.3.2	p0z1.1.2	p0z1.1.10	p0z1.2.2	p0z1.2.10
																			phytopk_added	na	na	na	na	0	0	0	0	0	0	1	1	1	1	1	1	2	2	2	2	2	2	3	3	3	3	0	0	0	0
																			copepods added	na	na	na	na	0	0	0	0	0	0	0	0	0	0	0	0	0	0	0	0	0	0	0	0	0	0	1	1	1	1
											heterotrophs								heterotrophs	36684	23725	21918	34358	15085	8709	13098	12154	8857	5178	19335	11358	12562	5275	10702	9917	18952	15675	11500	13455	11738	10626	23081	15656	12768	17976	14134	7957	9796	12697
											autotrophs								autotrophs	12327	26000	27470	14909	32869	40243	34091	36582	38921	44018	28752	38001	34357	43900	36985	39423	28540	29494	36281	35656	35515	38517	24274	33393	36475	28345	33791	41589	37394	36353
											parasites								parasites	173	16	147	139	100	54	173	75	135	71	63	54	92	88	49	44	95	125	294	76	73	7	26	52	30	101	138	18	120	46
											mixotrophs								mixotrophs	816	259	465	594	1946	994	2638	1189	2087	733	1850	587	2989	737	2264	616	2413	4706	1925	813	2674	850	2619	899	727	3578	1937	436	2690	904
																																														a
[truncated: 42 more columns]

## Sheet: replicates_pooled
Ttaxo_rank5	Tmorpho	trophic	size		Taxa	size		T0	p0z0	p1z0	p2z0	p3z0	p0z1	p1z1	p2z1	p3z1	p0z2	p1z2	p2z2	p3z2
Alveolata	Acavomonas	heterotrophs	10-80µm	1	Alveolata_Acavomonas	10-80µm	Alveolata_Acavomonas_10-80µm	0	0	0	0	0	0	0	0	0	0	0	0	0
Alveolata	Apicomplexa	heterotrophs	10-80µm	2	Alveolata_Apicomplexa	10-80µm	Alveolata_Apicomplexa_10-80µm	0	0	0	0	0	0	0	0	0	0	0	0	0
Alveolata	Colpodellida	heterotrophs	10-80µm	3	Alveolata_Colpodellida	10-80µm	Alveolata_Colpodellida_10-80µm	0	0	0	0	0	45.3333	0	4	0	0	0	0	56.6667
Alveolata	Ciliophora	heterotrophs	10-80µm	4	Alveolata_Ciliophora	10-80µm	Alveolata_Ciliophora_10-80µm	21076	6766	7159.33	10365.3	11534.5	6293.33	3993.67	8316.33	7374	3985.33	4896.67	5358	5462.67
Alveolata	Colponemidia	heterotrophs	10-80µm	5	Alveolata_Colponemidia	10-80µm	Alveolata_Colponemidia_10-80µm	61.5	0	0	0	0	5.33333	9	0	15.5	0.666667	0	0	12.6667
Alveolata	Dinophyceae	autotrophs	10-80µm	6	Alveolata_Dinophyceae	10-80µm	Alveolata_Dinophyceae_10-80µm	2132	744.667	926.333	876.667	807.5	1049.67	680.333	925.333	870.5	818	940.667	718	756.333
Alveolata	Ellobiopsidae	heterotrophs	10-80µm	7	Alveolata_Ellobiopsidae	10-80µm	Alveolata_Ellobiopsidae_10-80µm	0	0	0	0	0	0	0	0	0	0	0	0	0
Alveolata	Perkinsozoa	heterotrophs	10-80µm	8	Alveolata_Perkinsozoa	10-80µm	Alveolata_Perkinsozoa_10-80µm	0	0	0	0	0	0	0	0	0	0	0	0	0
Rhizaria	Acantharea	heterotrophs	10-80µm	9	Rhizaria_Acantharea	10-80µm	Rhizaria_Acantharea_10-80µm	17	21.6667	13.3333	22	7	8.33333	2.66667	6.66667	31	3	20.6667	9	20.3333
Rhizaria	Endomyxa	heterotrophs	10-80µm	10	Rhizaria_Endomyxa	10-80µm	Rhizaria_Endomyxa_10-80µm	68	39.3333	0.666667	0	0	199.667	56.6667	410.667	0	9.66667	121.667	74.6667	158
Rhizaria	Cercozoa	heterotrophs	10-80µm	11	Rhizaria_Cercozoa	10-80µm	Rhizaria_Cercozoa_10-80µm	1242.5	787.667	543	1196.33	463.5	639.333	514	899.667	629.5	816.667	906	1269	980.333
Rhizaria	Foraminifera	heterotrophs	10-80µm	12	Rhizaria_Foraminifera	10-80µm	Rhizaria_Foraminifera_10-80µm	0	4.66667	1.33333	2.33333	1.5	16.6667	0	0	0	0	0	0	0
Rhizaria	Polycystinea	heterotrophs	10-80µm	13	Rhizaria_Polycystinea	10-80µm	Rhizaria_Polycystinea_10-80µm	58.5	43.6667	61.6667	30	53	8.33333	37.3333	57	49.5	44	29.6667	55.6667	65
Rhizaria	unclassified	heterotrophs	10-80µm	14	Rhizaria_unclassified	10-80µm	Rhizaria_unclassified_10-80µm	0	119.667	111.333	70.3333	81.5	99.3333	131	98.3333	178	95.6667	83	168.333	136.333
Stramenopila	Bacillariophyta	autotrophs	10-80µm	15	Stramenopila_Bacillariophyta	10-80µm	Stramenopila_Bacillariophyta_10-80µm	9977	31512.3	32080.7	23009.7	29077.5	33812.3	37802.3	28846.3	29475	35320.7	31996.3	31983.7	33914.7
Stramenopila	Bicosecida	heterotrophs	10-80µm	16	Stramenopila_Bicosecida	10-80µm	Stramenopila_Bicosecida_10-80µm	2394	532.333	584.333	1002.67	1203.5	747.333	252.333	679	507	440.333	625.333	860	639.333
Stramenopila	Blastocystidae	heterotrophs	10-80µm	17	Stramenopila_Blastocystidae	10-80µm	Stramenopila_Blastocystidae_10-80µm	0	27.6667	42	49.6667	40	31	24	89	101.5	72.6667	52	59	58.3333
Stramenopila	unclassified		10-80µm	18	Stramenopila_unclassified	10-80µm	Stramenopila_unclassified_10-80µm	31.5	40	48.6667	136.667	2.5	27.3333	44	70	19.5	119.667	81.3333	28	57.3333
Stramenopila	Chrysophyceae	heterotrophs	10-80µm	19	Stramenopila_Chrysophyceae	10-80µm	Stramenopila_Chrysophyceae_10-80µm	1.5	1.33333	2.33333	2.66667	2.5	1.66667	1	0	0	0	2	1	6.66667
Stramenopila	Chrysomerophyceae	autotrophs	10-80µm	20	Stramenopila_Chrysomerophyceae	10-80µm	Stramenopila_Chrysomerophyceae_10-80µm	393.5	970.333	644.333	2119.67	780	519.333	537.667	889.333	1161.5	766.667	867	802.667	1124.67
Stramenopila	Developea	heterotrophs	10-80µm	21	Stramenopila_Developea	10-80µm	Stramenopila_Developea_10-80µm	0	0	2	0	0	0	0.666667	1.66667	0	0	0	0	0
Stramenopila	Dictyochiphyceae	autotrophs	10-80µm	22	Stramenopila_Dictyochiphyceae	10-80µm	Stramenopila_Dictyochiphyceae_10-80µm	5174.5	6835.33	6065.33	8525	4151	4563.67	4310	6645.33	7507	5269.67	6729.67	6163	4429.67
Stramenopila	Eustigmatophyceae	autotrophs	10-80µm	23	Stramenopila_Eustigmatophyceae	10-80µm	Stramenopila_Eustigmatophyceae_10-80µm	0	0	0	0	0	0	0	0	0	0	0	0	0
Stramenopila	Hyphochytriomycetes	heterotrophs	10-80µm	24	Stramenopila_Hyphochytriomycetes	10-80µm	Stramenopila_Hyphochytriomycetes_10-80µm	0	0	0	0	0	0	0	0	0	0	0	0	0
Stramenopila	Labyrinthulomycetes	heterotrophs	10-80µm	25	Stramenopila_Labyrinthulomycetes	10-80µm	Stramenopila_Labyrinthulomycetes_10-80µm	0	1.66667	4	0	0	0	0.666667	0	0	0	17.6667	3.33333	10.3333
Stramenopila	Oomycetes	heterotrophs	10-80µm	26	Stramenopila_Oomycetes	10-80µm	Stramenopila_Oomycetes_10-80µm	16.5	14	0	0	0	0.666667	0	0	0	0	0	0	8.33333
Stramenopila	Pelagophyceae	autotrophs	10-80µm	27	Stramenopila_Pelagophyceae	10-80µm	Stramenopila_Pelagophyceae_10-80µm	412.5	66.3333	94.6667	486	38	57	91.6667	131	229.5	78.6667	142	243	129.333
Stramenopila	Phaeothamniophyceae	autotrophs	10-80µm	28	Stramenopila_Phaeothamniophyceae	10-80µm	Stramenopila_Phaeothamniophyceae_10-80µm	0	1.33333	1	0	0	0	0	0	0	0	0	0.666667	0
Stramenopila	Pirsoniales	autotrophs	10-80µm	29	Stramenopila_Pirsoniales	10-80µm	Stramenopila_Pirsoniales_10-80µm	0	0	0	0	0	0	0	0	0	0	0	0	0
Stramenopila	PX-clade	autotrophs	10-80µm	30	Stramenopila_PX-clade	10-80µm	Stramenopila_PX-clade_10-80µm	955.5	690.667	777.333	752	529	758	516	803.333	642	581	863.333	875.667	604.667
Stramenopila	Raphidophyceae	autotrophs	10-80µm	31	Stramenopila_Raphidophyceae	10-80µm	Stramenopila_Raphidophyceae_10-80µm	0	34.6667	0	0	0	1	0	14.6667	0	4.33333	5	0	2.33333
Stramenopila	Synurophyceae	autotrophs	10-80µm	32	Stramenopila_Synurophyceae	10-80µm	Stramenopila_Synurophyceae_10-80µm	474	276.667	356.333	593.333	167	254.667	274.667	533	243	321.667	482	355	349.667
Alveolata	Acavomonas	heterotrophs	2-10µm	33	Alveolata_Acavomonas	2-10µm	Alveolata_Acavomonas_2-10µm	0	0	0	0	0	0	0	0	0	0	0	0	0
Alveolata	Apicomplexa	heterotrophs	2-10µm	34	Alveolata_Apicomplexa	2-10µm	Alveolata_Apicomplexa_2-10µm	0	0	0	0	0	0	0	0	0	0	0	0	0
Alveolata	Colpodellida	heterotrophs	2-10µm	35	Alveolata_Colpodellida	2-10µm	Alveolata_Colpodellida_2-10µm	0	6	27.3333	16.6667	8.5	15.6667	12.3333	13.6667	0	15.6667	15	29	0
Alveolata	Ciliophora	heterotrophs	2-10µm	36	Alveolata_Ciliophora	2-10µm	Alveolata_Ciliophora_2-10µm	21895	9055	10436.7	10163	16189.5	6806.67	6596	9810	10338	5360.33	5145	7812	12511
Alveolata	Colponemidia	heterotrophs	2-10µm	37	Alveolata_Colponemidia	2-10µm	Alveolata_Colponemidia_2-10µm	0	2	1	31	0	32.3333	0	2	0	0	2.33333	0	0
Alveolata	Dinophyceae	autotrophs	2-10µm	38	Alveolata_Dinophyceae	2-10µm	Alveolata_Dinophyceae_2-10µm	1857	1406	1206.67	1513.33	1938.5	1292.67	1949.67	1574.33	1593.5	1826	2017.33	1733.67	1998.33
Alveolata	Ellobiopsidae	heterotrophs	2-10µm	39	Alveolata_Ellobiopsidae	2-10µm	Alveolata_Ellobiopsidae_2-10µm	0	0	0	0	0	0	0	0	0	0	0	0	0
Alveolata	Perkinsozoa	heterotrophs	2-10µm	40	Alveolata_Perkinsozoa	2-10µm	Alveolata_Perkinsozoa_2-10µm	0	0	0	0	0	0	0	0	0	0	0	0	0
Rhizaria	Acantharea	heterotrophs	2-10µm	41	Rhizaria_Acantharea	2-10µm	Rhizaria_Acantharea_2-10µm	0	18.3333	28.3333	17	45	40	17	61	0	52.3333	23.6667	22	42.6667
Rhizaria	Endomyxa	heterotrophs	2-10µm	42	Rhizaria_Endomyxa	2-10µm	Rhizaria_Endomyxa_2-10µm	68	22	149.667	49.3333	27.5	77.3333	111	100.333	0	82.6667	10	113.667	41
Rhizaria	Cercozoa	heterotrophs	2-10µm	43	Rhizaria_Cercozoa	2-10µm	Rhizaria_Cercozoa_2-10µm	2547	1852.67	1810.67	1483	1881.5	2194	2201.67	2049.67	2316.5	2625	2261	2352.33	2299.67
Rhizaria	Foraminifera	heterotrophs	2-10µm	44	Rhizaria_Foraminifera	2-10µm	Rhizaria_Foraminifera_2-10µm	0	15	13.3333	9	5	24.6667	11	6	0	31	20	12.6667	14.6667
Rhizaria	Polycystinea	heterotrophs	2-10µm	45	Rhizaria_Polycystinea	2-10µm	Rhizaria_Polycystinea_2-10µm	135	91.6667	78.6667	106.667	86	106	71.3333	84.3333	123	121	149.667	80.3333	81.3333
Rhizaria	unclassified	heterotrophs	2-10µm	46	Rhizaria_unclassified	2-10µm	Rhizaria_unclassified_2-10µm	33.5	4.33333	13.6667	20	24	20.3333	7	37	0	28.6667	59.3333	52.3333	54.3333
Stramenopila	Bacillariophyta	autotrophs	2-10µm	47	Stramenopila_Bacillariophyta	2-10µm	Stramenopila_Bacillariophyta_2-10µm	10500	10258	7399	16088.3	10616.5	10050	9139	9800.67	8765.5	10465.7	11898	13439.7	10340
Stramenopila	Bicosecida	heterotrophs	2-10µm	48	Stramenopila_Bicosecida	2-10µm	Stramenopila_Bicosecida_2-10µm	1398	889	1285.33	1555.33	1708	1271.33	891.667	1491.33	1778	1533.33	1357.33	1911.67	1973.67
Stramenopila	Blastocystidae	heterotrophs	2-10µm	49	Stramenopila_Blastocystidae	2-10µm	Stramenopila_Blastocystidae_2-10µm	56	122.667	60.6667	106.333	55.5	110.667	107.667	77.6667	97	130.333	127.333	76.3333	72
Stramenopila	unclassified		2-10µm	50	Stramenopila_unclassified	2-10µm	Stramenopila_unclassified_2-10µm	83.5	185	165.333	118.667	122.5	186.667	148	165.333	233.5	211.333	254.667	248	203.333
Stramenopila	Chrysophyceae	heterotrophs	2-10µm	51	Stramenopila_Chrysophyceae	2-10µm	Stramenopila_Chrysophyceae_2-10µm	339	7	12.6667	4.66667	2.5	8.66667	6.66667	26	0	14	27	6	1
Stramenopila	Chrysomerophyceae	autotrophs	2-10µm	52	Stramenopila_Chrysomerophyceae	2-10µm	Stramenopila_Chrysomerophyceae_2-10µm	272.5	2214.33	2348	2330.33	3091.5	2346.33	2569	2547.33	3844.5	2702	1851	1913.33	3546.67
Stramenopila	Developea	heterotrophs	2-10µm	53	Stramenopila_Developea	2-10µm	Stramenopila_Developea_2-10µm	0	0	0	0	0	0	7.33333	0	0	0.666667	0	0	0
Stramenopila	Dictyochiphyceae	autotrophs	2-10µm	54	Stramenopila_Dictyochiphyceae	2-10µm	Stramenopila_Dictyochiphyceae_2-10µm	4543	18363.3	20152.3	12197	10194.5	20462	20576.3	18134	15935	18756	18603.7	15154.7	12495.7
Stramenopila	Eustigmatophyceae	autotrophs	2-10µm	55	Stramenopila_Eustigmatophyceae	2-10µm	Stramenopila_Eustigmatophyceae_2-10µm	0	0	0	0	0	0	0	0	0	0	0	0	0
Stramenopila	Hyphochytriomycetes	heterotrophs	2-10µm	56	Stramenopila_Hyphochytriomycetes	2-10µm	Stramenopila_Hyphochytriomycetes_2-10µm	0	0	0	0	0	0	0	0	0	0	0	0	0
Stramenopila	Labyrinthulomycetes	heterotrophs	2-10µm	57	Stramenopila_Labyrinthulomycetes	2-10µm	Stramenopila_Labyrinthulomycetes_2-10µm	0	0	1.66667	0	0	2.33333	0	0	0	4.33333	7.66667	8.33333	2.33333
Stramenopila	Oomycetes	heterotrophs	2-10µm	58	Stramenopila_Oomycetes	2-10µm	Stramenopila_Oomycetes_2-10µm	4	1.33333	0	0	0	1.33333	0	0	0	1.33333	7.33333	2.66667	0
Stramenopila	Pelagophyceae	autotrophs	2-10µm	59	Stramenopila_Pelagophyceae	2-10µm	Stramenopila_Pelagophyceae_2-10µm	283.5	1021.33	1098.33	771	722	796.667	768.333	544	924	968.333	1277	1001.33	1078.67
Stramenopila	Phaeothamniophyceae	autotrophs	2-10µm	60	Stramenopila_Phaeothamniophyceae	2-10µm	Stramenopila_Phaeothamniophyceae_2-10µm	0	8	0	0	0	0	0	0	0	0	0	0	0
Stramenopila	Pirsoniales	autotrophs	2-10µm	61	Stramenopila_Pirsoniales	2-10µm	Stramenopila_Pirsoniales_2-10µm	0	0	0	0	0	0	0	0	0	0	0	0	0
Stramenopila	PX-clade	autotrophs	2-10µm	62	Stramenopila_PX-clade	2-10µm	Stramenopila_PX-clade_2-10µm	1164	1809.33	1561	1301	1112	1730	1810	1434.67	1417	2027.67	1690	1458.67	1210.33
Stramenopila	Raphidophyceae	autotrophs	2-10µm	63	Stramenopila_Raphidophyceae	2-10µm	Stramenopila_Raphidophyceae_2-10µm	0	0	0	0	0	4.33333	0	0	0	2	1.33333	0	3.33333
Stramenopila	Synurophyceae	autotrophs	2-10µm	64	Stramenopila_Synurophyceae	2-10µm	Stramenopila_Synurophyceae_2-10µm	521.5	2300.67	1833	1331	1546.5	1948.67	2366.67	1734.33	1413.5	2418.67	2738	1969	1335
									0	1	2	3	0	1	2	3	0	1	2	3
								T0	p0z0	p1z0	p2z0	p3z0	p0z1	p1z1	p2z1	p3z1	p0z2	p1z2	p2z2	p3z2
					Alveolata	2-10µm	autotrophs	1857	1406	1206.67	1513.33	1938.5	1292.67	1949.67	1574.33	1593.5	1826	2017.33	1733.67	1998.33
					Alveolata	2-10µm	heterotrophs	21895	9063	10465	10210.7	16198	6854.67	6608.33	9825.67	10338	5376	5162.33	7841	12511
					Alveolata	10-80µm	autotrophs	2132	744.667	926.333	876.667	807.5	1049.67	680.333	925.333	870.5	818	940.667	718	756.333
					Alveolata	10-80µm	heterotrophs	21137.5	6766	7159.33	10365.3	11534.5	6344	4002.67	8320.33	7389.5	3986	4896.67	5358	5532
					Stramenopila	2-10µm	autotrophs	17284.5	35975	34391.7	34018.7	27283	37338	37229.3	34195	32299.5	37340.3	38059	34936.7	30009.7
					Stramenopila	2-10µm	heterotrophs	1797	1020	1360.33	1666.33	1766	1394.33	1013.33	1595	1875	1684	1526.67	2005	2049
					Stramenopila	10-80µm	autotrophs	17387	40387.7	40019.7	35485.7	34742.5	39966	43532.3	37863	39258	42342.7	41085.3	40423.7	40555
					Stramenopila	10-80µm	heterotrophs	2412	577	634.667	1055	1246	780.667	278.667	769.667	608.5	513	697	923.333	723
					Rhizaria	2-10µm	autotrophs	0	0	0	0	0	0	0	0	0	0	0	0	0
					Rhizaria	2-10µm	heterotrophs	2783.5	2004	2094.33	1685	2069	2462.33	2419	2338.33	2439.5	2940.67	2523.67	2633.33	2533.67
					Rhizaria	10-80µm	autotrophs	0	0	0	0	0	0	0	0	0	0	0	0	0
					Rhizaria	10-80µm	heterotrophs	1386	1016.67	731.333	1321	606.5	971.667	741.667	1472.33	888	969	1161	1576.67	1360
									0	1	2	3	0	1	2	3	0	1	2	3
								heterotrophs	20446.7	22445	26303.3	33420	18807.7	15063.7	24321.3	23538.5	15468.7	15967.3	20337.3	24708.7
								autotrophs	78513.3	76544.3	71894.3	64771.5	79646.3	83391.7	74557.7	74021.5	82327	82102.3	77812	73319.3
